# Supplementary material for: Genome-Wide Identification and Characterization of Long Non-Coding RNAs in Longissimus dorsi Skeletal Muscle of Shandong Black Cattle and Luxi Cattle
Source: Front Genet. 2022 May 16;13:849399. doi: 10.3389/fgene.2022.849399 (PMC9149217; doi:10.3389/fgene.2022.849399)
Supplement: Supplementary file 3 [file Table9.XLSX]

## Sheet: GO
GO term (level 2)	num of genes	Pvalue	FDR	Genes
multicellular organism development	401	1.72e-21	1.01e-17	gene10163;gene10186;gene10295;gene10300;gene10318;gene10322;gene10367;gene10411;gene1042;gene10506;gene10510;gene1064;gene10677;gene10844;gene10937;gene11044;gene11048;gene11083;gene1119;gene1121;gene11239;gene11372;gene11382;gene11464;gene11523;gene11664;gene11863;gene12062;gene12096;gene12135;gene12257;gene12279;gene12337;gene12498;gene12525;gene12536;gene12553;gene1261;gene12689;gene1275;gene1…
single-multicellular organism process	460	3.1e-21	1.01e-17	gene10163;gene10186;gene10234;gene10251;gene10295;gene10300;gene10318;gene10322;gene1035;gene10367;gene10411;gene1042;gene10506;gene10510;gene1064;gene10677;gene10774;gene10844;gene10937;gene11044;gene11048;gene11063;gene11083;gene11099;gene11151;gene1119;gene1121;gene11239;gene11372;gene11382;gene11464;gene11493;gene11523;gene11664;gene11863;gene12062;gene12096;gene12135;gene12163;gene12257;gene…
multicellular organismal process	493	8.78e-20	1.91e-16	gene10163;gene10186;gene10234;gene10251;gene10295;gene10300;gene10312;gene10318;gene10322;gene1035;gene10367;gene10411;gene1042;gene10506;gene10510;gene1064;gene10677;gene10687;gene10688;gene10774;gene10844;gene10937;gene11044;gene11048;gene11063;gene11083;gene11099;gene11151;gene1119;gene1121;gene11239;gene11372;gene11382;gene11464;gene11493;gene11523;gene11664;gene11863;gene12062;gene12096;gene…
system development	354	2.26e-19	3.69e-16	gene10163;gene10186;gene10295;gene10300;gene10318;gene10322;gene10367;gene10411;gene1042;gene10506;gene10510;gene1064;gene10677;gene10937;gene11044;gene11048;gene11083;gene1119;gene1121;gene11239;gene11372;gene11382;gene11464;gene11523;gene11863;gene12062;gene12096;gene12135;gene12257;gene12279;gene12337;gene12498;gene12525;gene12536;gene12689;gene12793;gene1286;gene12860;gene12867;gene13014;gene…
single-organism developmental process	454	7.76e-19	1.01e-15	gene10163;gene10186;gene10251;gene10295;gene10300;gene10312;gene10317;gene10318;gene10322;gene10367;gene10411;gene1042;gene10434;gene10506;gene10510;gene1064;gene10677;gene10844;gene10937;gene11044;gene11048;gene11083;gene1119;gene1121;gene11239;gene11372;gene11382;gene11464;gene11523;gene11664;gene11863;gene12062;gene12096;gene12135;gene12257;gene12279;gene12337;gene12498;gene12525;gene12536;gen…
developmental process	458	1.62e-18	1.76e-15	gene10163;gene10186;gene10251;gene10295;gene10300;gene10312;gene10317;gene10318;gene10322;gene10367;gene10411;gene1042;gene10434;gene10506;gene10510;gene1064;gene10677;gene10844;gene10937;gene11044;gene11048;gene11083;gene1119;gene1121;gene11239;gene11372;gene11382;gene11464;gene11523;gene11664;gene11863;gene12062;gene12096;gene12135;gene12257;gene12279;gene12337;gene12498;gene12525;gene12536;gen…
anatomical structure development	409	5.78e-18	5.39e-15	gene10163;gene10186;gene10251;gene10295;gene10300;gene10312;gene10317;gene10318;gene10322;gene10367;gene10411;gene1042;gene10434;gene10506;gene10510;gene1064;gene10677;gene10844;gene10937;gene11044;gene11048;gene11083;gene1119;gene1121;gene11239;gene11372;gene11382;gene11464;gene11523;gene11863;gene12062;gene12096;gene12135;gene12257;gene12279;gene12337;gene12498;gene12525;gene12536;gene1261;gene…
muscle structure development	83	4.89e-16	3.99e-13	gene10163;gene10434;gene1119;gene1121;gene11523;gene11863;gene12135;gene12257;gene12536;gene12793;gene14397;gene1487;gene1500;gene15043;gene15491;gene15552;gene15598;gene16000;gene1605;gene162;gene16264;gene16517;gene16838;gene16995;gene17083;gene17325;gene17507;gene17654;gene17880;gene18511;gene18645;gene18713;gene19909;gene20195;gene20715;gene20888;gene20900;gene21393;gene21781;gene22041;gene22…
tissue development	169	2.51e-15	1.82e-12	gene10163;gene10186;gene10251;gene10844;gene11048;gene1119;gene11382;gene11464;gene11523;gene12135;gene12257;gene12279;gene12337;gene12498;gene12525;gene12536;gene1261;gene1275;gene12793;gene12867;gene13030;gene13447;gene14397;gene14543;gene1487;gene1498;gene1500;gene15149;gene15222;gene15236;gene15258;gene1535;gene15400;gene15552;gene15598;gene15600;gene15605;gene15662;gene15875;gene15883;gene16…
animal organ development	254	8.73e-15	5.7e-12	gene10163;gene10186;gene10322;gene10411;gene1042;gene10677;gene10937;gene11048;gene1119;gene1121;gene11239;gene11382;gene11464;gene11523;gene12096;gene12135;gene12257;gene12279;gene12337;gene12498;gene12525;gene12536;gene12793;gene12860;gene12867;gene13014;gene13030;gene133;gene13447;gene13473;gene13654;gene14039;gene14134;gene14397;gene14543;gene1487;gene14965;gene1498;gene1500;gene15003;gene151…
cell differentiation	310	2.32e-14	1.38e-11	gene10163;gene10186;gene10322;gene10367;gene10411;gene10434;gene10510;gene10937;gene11044;gene11083;gene1119;gene11372;gene11382;gene11464;gene11523;gene11664;gene11863;gene12096;gene12257;gene12279;gene12498;gene12525;gene12536;gene1261;gene12689;gene1275;gene12793;gene1286;gene12860;gene13041;gene133;gene1335;gene13473;gene13766;gene13971;gene14039;gene14134;gene14397;gene1487;gene14965;gene149…
anatomical structure morphogenesis	238	9.31e-14	5.07e-11	gene10163;gene10186;gene10251;gene10312;gene10317;gene10411;gene10434;gene10510;gene10844;gene11044;gene11083;gene1119;gene11239;gene11372;gene11382;gene11464;gene12062;gene12257;gene12337;gene12498;gene12525;gene12536;gene1261;gene1275;gene12793;gene1286;gene12867;gene13014;gene13041;gene133;gene13447;gene14397;gene14543;gene14713;gene1498;gene1500;gene15149;gene15236;gene15258;gene1535;gene1555…
muscle tissue development	57	1.11e-13	5.55e-11	gene10163;gene1119;gene11523;gene12135;gene12257;gene12536;gene12793;gene14397;gene1487;gene1500;gene15149;gene15236;gene15552;gene15598;gene16000;gene1605;gene162;gene16264;gene16517;gene16838;gene17325;gene17880;gene17953;gene18713;gene20195;gene20715;gene20900;gene21781;gene22041;gene2221;gene23554;gene2418;gene24225;gene24265;gene27185;gene27472;gene27736;gene27814;gene28736;gene28995;gene290…
circulatory system development	106	1.39e-12	6.04e-10	gene1042;gene1119;gene11372;gene12062;gene12257;gene12498;gene12536;gene12793;gene133;gene14397;gene14543;gene1500;gene15149;gene15236;gene15258;gene15552;gene15598;gene15600;gene15605;gene15662;gene16000;gene162;gene16264;gene16284;gene16285;gene16517;gene16995;gene17325;gene17654;gene17880;gene17953;gene18097;gene18713;gene18724;gene19467;gene19678;gene20247;gene20285;gene20367;gene20528;gene20…
cardiovascular system development	106	1.39e-12	6.04e-10	gene1042;gene1119;gene11372;gene12062;gene12257;gene12498;gene12536;gene12793;gene133;gene14397;gene14543;gene1500;gene15149;gene15236;gene15258;gene15552;gene15598;gene15600;gene15605;gene15662;gene16000;gene162;gene16264;gene16284;gene16285;gene16517;gene16995;gene17325;gene17654;gene17880;gene17953;gene18097;gene18713;gene18724;gene19467;gene19678;gene20247;gene20285;gene20367;gene20528;gene20…
regulation of multicellular organismal process	223	2.45e-12	9.99e-10	gene10234;gene10251;gene1035;gene10367;gene10411;gene10506;gene1064;gene10774;gene11063;gene11083;gene11099;gene1119;gene11382;gene11464;gene11493;gene11863;gene12163;gene12337;gene12498;gene12536;gene12689;gene12793;gene12859;gene1286;gene133;gene13437;gene13473;gene14039;gene14134;gene14289;gene14543;gene1487;gene14965;gene1498;gene1500;gene15149;gene15222;gene15236;gene15258;gene1535;gene15552…
striated muscle tissue development	53	3.06e-12	1.18e-09	gene10163;gene1119;gene11523;gene12135;gene12257;gene12536;gene12793;gene14397;gene1487;gene15236;gene15552;gene15598;gene16000;gene1605;gene162;gene16264;gene16517;gene16838;gene17325;gene17880;gene17953;gene18713;gene20195;gene20715;gene20900;gene21781;gene22041;gene23554;gene2418;gene24225;gene24265;gene27185;gene27472;gene27736;gene27814;gene28736;gene28995;gene29093;gene29773;gene29965;gene3…
cellular developmental process	322	1.11e-11	4.04e-09	gene10163;gene10186;gene10312;gene10317;gene10322;gene10367;gene10411;gene10434;gene10510;gene10937;gene11044;gene11083;gene1119;gene11372;gene11382;gene11464;gene11523;gene11664;gene11863;gene12096;gene12257;gene12279;gene12498;gene12525;gene12536;gene1261;gene12689;gene1275;gene12793;gene1286;gene12860;gene13041;gene133;gene1335;gene13473;gene13766;gene13971;gene14039;gene14134;gene14397;gene14…
muscle organ development	53	1.19e-11	4.08e-09	gene10163;gene1119;gene1121;gene11523;gene12135;gene12257;gene12536;gene12793;gene1487;gene1500;gene15552;gene15598;gene16000;gene1605;gene162;gene16264;gene16838;gene16995;gene17083;gene17325;gene17654;gene17880;gene18511;gene18645;gene18713;gene20195;gene20715;gene20900;gene21781;gene2285;gene23554;gene2418;gene24265;gene27472;gene27736;gene27814;gene28736;gene29093;gene29965;gene30501;gene3060…
striated muscle cell differentiation	41	1.88e-11	6.14e-09	gene10434;gene11523;gene11863;gene12793;gene14397;gene15491;gene15552;gene15598;gene162;gene16264;gene16517;gene17507;gene17654;gene18713;gene19909;gene20715;gene20888;gene21393;gene21781;gene22041;gene2221;gene23041;gene24225;gene24265;gene2646;gene27339;gene28995;gene29093;gene29773;gene30602;gene32121;gene32803;gene4029;gene4949;gene5462;gene6025;gene7890;gene8034;gene8249;gene8538;gene895
muscle cell differentiation	52	6.88354e-11	2.13488e-08	gene10163;gene10434;gene11523;gene11863;gene12793;gene14397;gene1487;gene15043;gene15491;gene15552;gene15598;gene162;gene16264;gene16517;gene17507;gene17654;gene18713;gene19909;gene20715;gene20888;gene21393;gene21781;gene22041;gene2221;gene2285;gene23041;gene24225;gene24265;gene25572;gene2646;gene2688;gene27339;gene28995;gene29093;gene29773;gene30501;gene30602;gene30654;gene32121;gene32803;gene33…
regulation of multicellular organismal development	156	3.12628e-10	9.25521e-08	gene10367;gene10411;gene10506;gene1064;gene11083;gene1119;gene11382;gene11863;gene12337;gene12498;gene12536;gene12689;gene12793;gene133;gene13473;gene14543;gene1487;gene1498;gene1500;gene15149;gene15222;gene15236;gene15258;gene1535;gene15552;gene15598;gene15600;gene15605;gene15662;gene16000;gene162;gene16203;gene16264;gene16285;gene16431;gene16946;gene16995;gene17325;gene17507;gene17606;gene17654…
contractile fiber	40	5.12782e-10	2.11028e-07	gene10186;gene10434;gene1121;gene11863;gene13642;gene13654;gene15043;gene16517;gene17325;gene18511;gene18689;gene19909;gene20855;gene20888;gene20900;gene20902;gene21393;gene23041;gene24251;gene24252;gene2606;gene2646;gene26971;gene27302;gene27472;gene28995;gene29773;gene30501;gene30567;gene30602;gene31741;gene32121;gene32810;gene32813;gene4029;gene4102;gene5462;gene6700;gene7890;gene8034
contractile fiber part	38	5.85375e-10	2.11028e-07	gene10186;gene10434;gene1121;gene11863;gene13642;gene13654;gene15043;gene16517;gene17325;gene18511;gene18689;gene19909;gene20855;gene20888;gene20900;gene20902;gene21393;gene23041;gene24252;gene2606;gene2646;gene26971;gene27472;gene28995;gene29773;gene30501;gene30567;gene30602;gene31741;gene32121;gene32810;gene32813;gene4029;gene4102;gene5462;gene6700;gene7890;gene8034
vasculature development	74	6.29761e-10	1.78332e-07	gene1119;gene11372;gene12062;gene12536;gene12793;gene133;gene14543;gene1500;gene15149;gene15258;gene15552;gene15598;gene15600;gene15662;gene16000;gene16264;gene16284;gene16285;gene16995;gene17654;gene17880;gene17953;gene18097;gene18724;gene19467;gene19678;gene20247;gene20367;gene20528;gene20715;gene21781;gene22171;gene22214;gene22863;gene22874;gene24218;gene24225;gene24404;gene24520;gene24800;gen…
extracellular matrix	38	9.05586e-10	2.17643e-07	gene11372;gene1275;gene1276;gene13030;gene133;gene1339;gene14039;gene1498;gene1500;gene15600;gene15875;gene16000;gene16284;gene16285;gene16995;gene17303;gene20069;gene20462;gene22181;gene23300;gene24404;gene25572;gene2696;gene27185;gene27397;gene285;gene29076;gene31704;gene31840;gene33566;gene34385;gene366;gene4654;gene4848;gene504;gene6862;gene8563;gene9382
blood vessel development	71	1.74503e-09	4.73558e-07	gene1119;gene11372;gene12062;gene12536;gene12793;gene133;gene14543;gene1500;gene15149;gene15258;gene15552;gene15598;gene15600;gene15662;gene16000;gene16264;gene16284;gene16285;gene16995;gene17654;gene17880;gene17953;gene18097;gene18724;gene19467;gene19678;gene20247;gene20715;gene21781;gene22171;gene22214;gene22863;gene22874;gene24225;gene24404;gene24520;gene24800;gene25450;gene25572;gene25776;gen…
regulation of developmental process	192	2.10696e-09	5.48905e-07	gene10312;gene10317;gene10367;gene10411;gene10506;gene1064;gene11083;gene1119;gene11382;gene11863;gene12257;gene12337;gene12498;gene12536;gene12689;gene12793;gene133;gene13473;gene14039;gene14134;gene14543;gene14713;gene1487;gene1498;gene1500;gene15149;gene15199;gene15222;gene15236;gene15258;gene1535;gene15491;gene15552;gene15598;gene15600;gene15605;gene15662;gene15859;gene15875;gene15883;gene160…
sarcomere	36	2.1184e-09	2.91314e-07	gene10186;gene10434;gene1121;gene11863;gene13642;gene13654;gene15043;gene16517;gene17325;gene18511;gene18689;gene19909;gene20855;gene20888;gene20900;gene20902;gene21393;gene23041;gene24252;gene2606;gene2646;gene26971;gene27472;gene28995;gene30501;gene30567;gene30602;gene31741;gene32121;gene32810;gene32813;gene4029;gene4102;gene5462;gene7890;gene8034
myofibril	38	2.41397e-09	2.91314e-07	gene10186;gene10434;gene1121;gene11863;gene13642;gene13654;gene15043;gene16517;gene17325;gene18511;gene18689;gene19909;gene20855;gene20888;gene20900;gene20902;gene21393;gene23041;gene24251;gene24252;gene2606;gene2646;gene26971;gene27302;gene27472;gene28995;gene30501;gene30567;gene30602;gene31741;gene32121;gene32810;gene32813;gene4029;gene4102;gene5462;gene7890;gene8034
I band	27	2.42425e-09	2.91314e-07	gene10186;gene10434;gene1121;gene13642;gene15043;gene16517;gene17325;gene18511;gene18689;gene19909;gene20855;gene21393;gene23041;gene2606;gene2646;gene26971;gene27472;gene28995;gene30501;gene30567;gene30602;gene31741;gene32121;gene4029;gene4102;gene7890;gene8034
single organism signaling	392	3.46773e-09	8.66558e-07	gene10081;gene10251;gene10295;gene10300;gene10317;gene10318;gene10322;gene1035;gene10365;gene10411;gene1042;gene10506;gene10510;gene1064;gene10687;gene10688;gene10695;gene10844;gene10937;gene11083;gene11151;gene1119;gene11239;gene11372;gene11382;gene11493;gene11523;gene11586;gene11632;gene11664;gene11756;gene11863;gene12062;gene12257;gene12337;gene12498;gene12525;gene12536;gene12553;gene1261;gene…
single-organism process	850	3.59236e-09	8.66558e-07	gene10081;gene10163;gene10186;gene10234;gene10251;gene10295;gene10300;gene10312;gene10317;gene10318;gene10322;gene1035;gene10365;gene10367;gene10411;gene1042;gene10434;gene10506;gene10510;gene1064;gene10677;gene10687;gene10688;gene10695;gene10844;gene10937;gene10939;gene11044;gene11048;gene11063;gene11083;gene11099;gene11151;gene1119;gene1121;gene11239;gene11364;gene11372;gene11382;gene11427;gene…
proteinaceous extracellular matrix	25	4.03597e-09	4.15705e-07	gene11372;gene133;gene14039;gene1498;gene1500;gene15600;gene16000;gene16284;gene16285;gene16995;gene20069;gene20462;gene24404;gene2696;gene27397;gene285;gene29076;gene31840;gene33566;gene366;gene4654;gene4848;gene6862;gene8563;gene9382
response to stimulus	536	4.62997e-09	1.07697e-06	gene10081;gene10234;gene10251;gene1029;gene10312;gene10317;gene1034;gene1035;gene10365;gene10367;gene10411;gene1042;gene10443;gene10506;gene10510;gene10687;gene10688;gene10695;gene10844;gene10937;gene11044;gene11083;gene11099;gene11151;gene1119;gene11239;gene11372;gene11382;gene11493;gene11523;gene11586;gene11632;gene11664;gene11756;gene11863;gene12062;gene12096;gene12185;gene12257;gene12337;gene…
signaling	392	5.07558e-09	1.13991e-06	gene10081;gene10251;gene10295;gene10300;gene10317;gene10318;gene10322;gene1035;gene10365;gene10411;gene1042;gene10506;gene10510;gene1064;gene10687;gene10688;gene10695;gene10844;gene10937;gene11083;gene11151;gene1119;gene11239;gene11372;gene11382;gene11493;gene11523;gene11586;gene11632;gene11664;gene11756;gene11863;gene12062;gene12257;gene12337;gene12498;gene12525;gene12536;gene12553;gene1261;gene…
cell communication	397	7.83569e-09	1.70113e-06	gene10081;gene10251;gene10295;gene10300;gene10317;gene10318;gene10322;gene10365;gene10411;gene1042;gene10506;gene10510;gene1064;gene10687;gene10688;gene10695;gene10844;gene10937;gene11083;gene11151;gene1119;gene11239;gene11372;gene11382;gene11493;gene11523;gene11586;gene11632;gene11664;gene11756;gene11863;gene12062;gene12337;gene12498;gene12525;gene12536;gene12553;gene1261;gene12640;gene12662;gen…
extracellular matrix component	24	1.06338e-08	9.58369e-07	gene11372;gene133;gene14039;gene1498;gene1500;gene15600;gene16000;gene16284;gene16285;gene16995;gene20069;gene20462;gene24404;gene2696;gene27397;gene29076;gene31840;gene33566;gene366;gene4654;gene4848;gene6862;gene8563;gene9382
blood vessel morphogenesis	63	1.09415e-08	2.29876e-06	gene1119;gene11372;gene12062;gene12536;gene12793;gene133;gene14543;gene1500;gene15258;gene15552;gene15598;gene15662;gene16000;gene16264;gene16284;gene16285;gene16995;gene17654;gene17880;gene17953;gene18097;gene18724;gene19467;gene19678;gene20247;gene20715;gene21781;gene22171;gene22863;gene22874;gene24520;gene24800;gene25572;gene25776;gene26087;gene2688;gene2696;gene27185;gene27348;gene27949;gene2…
anatomical structure formation involved in morphogenesis	107	1.30168e-08	2.6083e-06	gene10411;gene10434;gene10844;gene1119;gene11372;gene11382;gene12062;gene12498;gene12525;gene12536;gene1261;gene1275;gene12793;gene133;gene14397;gene14543;gene1498;gene15149;gene15258;gene15552;gene15598;gene15600;gene15605;gene15662;gene16000;gene16264;gene16284;gene16285;gene16517;gene16995;gene17083;gene17507;gene17654;gene17953;gene18097;gene18724;gene18881;gene19197;gene19467;gene19678;gene1…

## Sheet: KEGG
GO term (level 2)	num of genes	Pvalue	Qvalue	Genes
Regulation of lipolysis in adipocyte	12	0.000112033	0.0254395	gene18724;gene4070;gene15267;gene7858;gene26081;gene22711;gene19908;gene13060;gene5354;gene22078;gene14184;gene18034
Protein digestion and absorption	14	0.000340328	0.0254395	gene1276;gene1275;gene33566;gene1339;gene16285;gene24404;gene17682;gene11372;gene4848;gene3599;gene22878;gene33025;gene27674;gene4654
Glycolysis / Gluconeogenesis	15	0.000206065	0.0254395	gene33681;gene4126;gene13030;gene26855;gene34254;gene7415;gene24076;gene32135;gene6400;gene11586;gene22428;gene32039;gene5580;gene17043;gene7154
ECM-receptor interaction	14	0.000340328	0.0254395	gene1276;gene1275;gene33566;gene1339;gene16285;gene24404;gene16995;gene4960;gene4848;gene2696;gene29076;gene27380;gene4654;gene27397
Glucagon signaling pathway	17	0.000979203	0.0487969	gene13030;gene18724;gene22053;gene26855;gene22870;gene34254;gene32135;gene6400;gene4439;gene11586;gene32039;gene8034;gene33736;gene8145;gene19467;gene17043;gene7154
Calcium signaling pathway	24	0.000832349	0.0487969	gene29913;gene13437;gene22041;gene21753;gene20855;gene28856;gene11493;gene4070;gene22053;gene24800;gene21393;gene22870;gene2248;gene9670;gene13060;gene19197;gene21333;gene27526;gene12859;gene8034;gene5354;gene33736;gene22078;gene30545
PPAR signaling pathway	12	0.00244591	0.0812586	gene11038;gene32018;gene8601;gene2491;gene12096;gene26081;gene15598;gene18034;gene17043;gene34166;gene32458;gene622
Adrenergic signaling in cardiomyocytes	20	0.00220609	0.0812586	gene29913;gene8658;gene16497;gene26971;gene20855;gene18596;gene11493;gene27339;gene1648;gene3599;gene27472;gene22870;gene13447;gene13654;gene13060;gene27250;gene27526;gene5354;gene22078;gene19467
Amoebiasis	15	0.00203803	0.0812586	gene33566;gene16285;gene24404;gene16995;gene14008;gene3061;gene1261;gene4848;gene31143;gene29076;gene9670;gene5354;gene8512;gene27397;gene15625
cAMP signaling pathway	27	0.00330596	0.0988481	gene29913;gene10317;gene26434;gene24535;gene10464;gene20855;gene18724;gene4070;gene8984;gene18729;gene1648;gene4102;gene3599;gene22870;gene7858;gene5235;gene32083;gene22711;gene19908;gene13060;gene21333;gene27526;gene5354;gene22078;gene14184;gene19467;gene30545
Insulin secretion	12	0.00396711	0.107833	gene8993;gene20855;gene8985;gene1648;gene3599;gene18111;gene5235;gene4439;gene13060;gene5354;gene22078;gene19467
Aldosterone synthesis and secretion	14	0.00489682	0.122012	gene20855;gene6248;gene9437;gene3599;gene22874;gene22870;gene16431;gene22711;gene13060;gene21333;gene27526;gene5354;gene22078;gene19467
Apelin signaling pathway	18	0.0075683	0.174071	gene13437;gene22041;gene19678;gene28856;gene18724;gene18729;gene3123;gene31374;gene27472;gene21393;gene22870;gene26081;gene22711;gene13060;gene7292;gene5354;gene8145;gene22078
Central carbon metabolism in cancer	11	0.0121355	0.25918	gene24948;gene13030;gene26855;gene22878;gene34254;gene32135;gene6400;gene4439;gene32039;gene7154;gene31574
Complement and coagulation cascades	11	0.0247964	0.363047	gene30014;gene28104;gene1261;gene20002;gene20005;gene31374;gene2682;gene25601;gene28114;gene28809;gene15625
Oxytocin signaling pathway	16	0.0298319	0.363047	gene17507;gene13437;gene22041;gene20855;gene28856;gene27339;gene14;gene29843;gene22870;gene16431;gene13060;gene27250;gene8034;gene5354;gene22078;gene6700
Cortisol synthesis and secretion	9	0.0255877	0.363047	gene20855;gene6248;gene9437;gene2862;gene13060;gene21333;gene5354;gene22078;gene19467
Axon guidance	20	0.0286235	0.363047	gene26332;gene17507;gene34600;gene27247;gene18411;gene3343;gene31695;gene3181;gene1119;gene9846;gene6350;gene2688;gene32083;gene26094;gene16264;gene25776;gene6862;gene8034;gene20141;gene1035
Vascular smooth muscle contraction	14	0.0266565	0.363047	gene22572;gene22041;gene20855;gene28856;gene29773;gene11493;gene24225;gene22870;gene13060;gene5354;gene24251;gene24252;gene22078;gene6700
Purine metabolism	19	0.0200826	0.363047	gene4502;gene4126;gene32837;gene13030;gene18724;gene27401;gene8984;gene26811;gene18769;gene4102;gene15392;gene17901;gene30716;gene27979;gene13060;gene5354;gene22078;gene28230;gene3624
Biosynthesis of unsaturated fatty acids	5	0.0303551	0.363047	gene8601;gene473;gene7957;gene32458;gene32457
Pyruvate metabolism	7	0.0297882	0.363047	gene13030;gene32018;gene34254;gene32135;gene32039;gene17043;gene7154
Dilated cardiomyopathy (DCM)	12	0.0239113	0.363047	gene29913;gene20855;gene4960;gene27339;gene27472;gene13447;gene13654;gene27380;gene13060;gene27250;gene5354;gene22078
Thyroid cancer	7	0.0297882	0.363047	gene14864;gene31589;gene9687;gene13654;gene11664;gene15598;gene31574
cGMP - PKG signaling pathway	18	0.0203694	0.363047	gene29913;gene17507;gene22041;gene18411;gene20855;gene28856;gene18724;gene11493;gene3123;gene3599;gene22870;gene19908;gene13060;gene27526;gene8034;gene5354;gene22078;gene19467
Thyroid hormone signaling pathway	13	0.0346408	0.389921	gene29913;gene12640;gene14;gene24800;gene3599;gene2688;gene14176;gene2248;gene6400;gene15598;gene4439;gene30545;gene15552
Mucin type O-glycan biosynthesis	5	0.0352103	0.389921	gene1798;gene12867;gene14996;gene1360;gene30059
Circadian rhythm - fly	2	0.0414757	0.397869	gene4674;gene23554
Salivary secretion	10	0.0445654	0.397869	gene13437;gene11493;gene3599;gene21393;gene22870;gene9755;gene13060;gene27526;gene5354;gene22078
Pantothenate and CoA biosynthesis	4	0.0451234	0.397869	gene26888;gene7137;gene12463;gene12467
Cysteine and methionine metabolism	7	0.0452426	0.397869	gene27690;gene10939;gene32135;gene7137;gene32039;gene34234;gene7154
AGE-RAGE signaling pathway in diabetic complications	11	0.0450837	0.397869	gene33566;gene16285;gene27814;gene24404;gene4848;gene24800;gene31143;gene2248;gene10312;gene30545;gene27949
AMPK signaling pathway	14	0.0413567	0.397869	gene8658;gene8601;gene2376;gene11493;gene4105;gene29843;gene16476;gene6400;gene11586;gene22711;gene8145;gene19467;gene17043;gene622
Focal adhesion	20	0.0384289	0.397869	gene1276;gene1275;gene33566;gene1339;gene16285;gene22041;gene24404;gene16995;gene28856;gene29965;gene4960;gene4848;gene8340;gene29076;gene32083;gene10312;gene4654;gene27949;gene27397;gene29138
Parathyroid hormone synthesis, secretion and action	11	0.0549978	0.444442	gene8984;gene10251;gene3123;gene4102;gene22181;gene15598;gene27974;gene13060;gene5354;gene22078;gene19467
Cardiac muscle contraction	11	0.0549978	0.444442	gene29913;gene20855;gene27339;gene3599;gene27472;gene22524;gene13447;gene18198;gene13654;gene17903;gene27250
Arginine and proline metabolism	7	0.0545981	0.444442	gene30603;gene10593;gene14008;gene21393;gene32712;gene30924;gene34234
Glutathione metabolism	8	0.0574664	0.45217	gene7191;gene27690;gene3721;gene3724;gene10443;gene26087;gene21052;gene34234
Pathways in cancer	44	0.0624038	0.460157	gene26434;gene18544;gene33566;gene16285;gene7191;gene27814;gene16995;gene27247;gene27157;gene13473;gene3721;gene3724;gene14864;gene12793;gene4070;gene12640;gene31143;gene2688;gene27962;gene22870;gene29076;gene10937;gene31589;gene9687;gene33808;gene13654;gene25572;gene21052;gene11664;gene15598;gene4439;gene13060;gene5354;gene569;gene16000;gene22078;gene15552;gene32803;gene4364;gene27949;gene31574;…
HIF-1 signaling pathway	13	0.0630109	0.460157	gene33681;gene31033;gene508;gene18097;gene34254;gene16476;gene24076;gene32135;gene6400;gene4439;gene32039;gene27949;gene7154
