# Supplementary material for: Genome-Wide Identification and Characterization of Long Non-Coding RNAs in Longissimus dorsi Skeletal Muscle of Shandong Black Cattle and Luxi Cattle
Source: Front Genet. 2022 May 16;13:849399. doi: 10.3389/fgene.2022.849399 (PMC9149217; doi:10.3389/fgene.2022.849399)
Supplement: Supplementary file 5 [file Table4.XLSX]

## Sheet: Up mRNA KEGG
KEGG_A_class	KEGG_B_class	Pathway	num	Pvalue（P）	Qvalue	Pathway ID	Genes	K_IDs
Metabolism	Nucleotide metabolism	Purine metabolism	13	0.0991763	0.560728	ko00230	gene4502;gene4126;gene32837;gene13030;gene8984;gene15152;gene26811;gene4102;gene15392;gene27979;gene13060;gene5354;gene3624	K01081+K01835+K03007+K00873+K13293+K01081+K01939+K13293+K00939+K18424+K08044+K08041+K01490
Environmental Information Processing	Signal transduction	MAPK signaling pathway	19	0.103605	0.574712	ko04010	gene20855;gene6248;gene3181;gene27339;gene31033;gene8340;gene25268;gene6480;gene9687;gene18097;gene32083;gene25572;gene11664;gene14961;gene8034;gene34246;gene32803;gene7605;gene27949	K04857+K04465+K05462+K04859+K05466+K05098+K04866+K04458+K04402+K05465+K04409+K04358+K04402+K06268+K04348+K04373+K13769+K17386+K05448
Organismal Systems	Endocrine system	Renin secretion	6	0.107348	0.58445	ko04924	gene20855;gene22870;gene14961;gene24858;gene21333;gene8034	K04857+K02183+K06268+K01283+K16056+K04348
Human Diseases	Substance dependence	Alcoholism	14	0.110169	0.588904	ko05034	gene8893;gene8892;gene20174;gene28590;gene28597;gene28428;gene28604;gene22870;gene28618;gene28619;gene28587;gene6407;gene34067;gene19467	K11253+K11251+K11253+K11254+K11252+K11251+K11252+K02183+K11252+K11252+K11252+K11408+K00274+K09048
Organismal Systems	Endocrine system	Parathyroid hormone synthesis, secretion and action	8	0.116897	0.599311	ko04928	gene8984;gene3123;gene4102;gene22181;gene15598;gene13060;gene5354;gene19467	K13293+K09262+K13293+K07995+K08524+K08044+K08041+K09048
Organismal Systems	Endocrine system	Regulation of lipolysis in adipocyte	5	0.122078	0.599311	ko04923	gene4336;gene7858;gene13060;gene5354;gene14184	K02649+K04204+K08044+K08041+K04249
Environmental Information Processing	Signal transduction	Phosphatidylinositol signaling system	8	0.122269	0.599311	ko04070	gene4336;gene24800;gene22870;gene31204;gene2248;gene6713;gene27737;gene30545	K02649+K05857+K02183+K18083+K05857+K00901+K07756+K05860
Human Diseases	Infectious diseases	Salmonella infection	8	0.122269	0.599311	ko05132	gene23832;gene29773;gene15429;gene24250;gene24254;gene24251;gene24252;gene8512	K13241+K10352+K06071+K10352+K10352+K10352+K10352+K05505
Organismal Systems	Digestive system	Salivary secretion	7	0.122308	0.599311	ko04970	gene3599;gene21393;gene22870;gene9755;gene13060;gene27526;gene5354	K01539+K13240+K02183+K10951+K08044+K05850+K08041
Organismal Systems	Immune system	Platelet activation	9	0.125978	0.603888	ko04611	gene22041;gene24404;gene28856;gene4848;gene4336;gene13060;gene19197;gene21333;gene5354	K00907+K06236+K00907+K06236+K02649+K08044+K16059+K16056+K08041
Metabolism	Metabolism of other amino acids	Taurine and hypotaurine metabolism	2	0.129405	0.603888	ko00430	gene26888;gene21708	K18966+K18592
Metabolism	Glycan biosynthesis and metabolism	Glycosaminoglycan biosynthesis - keratan sulfate	2	0.129405	0.603888	ko00533	gene1029;gene19457	K04745+K01022
Human Diseases	Cancers	Melanoma	6	0.133844	0.614846	ko05218	gene27157;gene4336;gene9687;gene25572;gene11664;gene7605	K09455+K02649+K04402+K04358+K04402+K17386
Organismal Systems	Immune system	Natural killer cell mediated cytotoxicity	10	0.137974	0.624065	ko04650	gene17507;gene34885;gene4336;gene34587;gene32083;gene14961;gene34594;gene34599;gene34567;gene8034	K17332+K07987+K02649+K07986+K04409+K06268+K07986+K07987+K07986+K04348
Human Diseases	Substance dependence	Amphetamine addiction	6	0.140913	0.627705	ko05031	gene22870;gene17652;gene14961;gene34067;gene8034;gene19467	K02183+K15867+K06268+K00274+K04348+K09048
Human Diseases	Infectious diseases	Toxoplasmosis	8	0.151018	0.662676	ko05145	gene26434;gene1654;gene16995;gene9437;gene23832;gene29076;gene29718;gene27397	K04734+K06485+K06240+K12473+K13241+K06240+K04694+K06243
Human Diseases	Cancers	Breast cancer	10	0.153368	0.663091	ko05224	gene14864;gene12793;gene12640;gene4336;gene2688;gene9687;gene25572;gene11664;gene569;gene15552	K04490+K06051+K08550+K02649+K00408+K04402+K04358+K04402+K06054+K02599
Cellular Processes	Cell motility	Regulation of actin cytoskeleton	15	0.159225	0.673604	ko04810	gene22041;gene1654;gene28856;gene29965;gene4960;gene29773;gene4336;gene32083;gene3121;gene25572;gene24250;gene24254;gene24251;gene24252;gene7605	K00907+K06485+K00907+K12758+K06591+K10352+K02649+K04409+K05767+K04358+K10352+K10352+K10352+K10352+K17386
Environmental Information Processing	Signaling molecules and interaction	Cell adhesion molecules (CAMs)	9	0.164289	0.673604	ko04514	gene22214;gene1654;gene13041;gene4960;gene20234;gene18651;gene19947;gene18195;gene22788	K06533+K06485+K06766+K06591+K06496+K06081+K06757+K16336+K06539
Metabolism	Metabolism of cofactors and vitamins	Thiamine metabolism	2	0.166727	0.673604	ko00730	gene15392;gene2702	K00939+K01077
Metabolism	Glycan biosynthesis and metabolism	Mucin type O-glycan biosynthesis	3	0.168419	0.673604	ko00512	gene18756;gene1798;gene30059	K00710+K00710+K00710
Human Diseases	Endocrine and metabolic diseases	Insulin resistance	8	0.169702	0.673604	ko04931	gene26434;gene10411;gene21319;gene4336;gene25046;gene8145;gene34246;gene19467	K04734+K17962+K09113+K02649+K04696+K07202+K04373+K09048
Organismal Systems	Immune system	Th1 and Th2 cell differentiation	6	0.170838	0.673604	ko04658	gene26434;gene17507;gene12793;gene14961;gene8034;gene15552	K04734+K17332+K06051+K06268+K04348+K02599
Human Diseases	Endocrine and metabolic diseases	Cushing syndrome	11	0.173515	0.673604	ko04934	gene20855;gene6248;gene9437;gene14864;gene6340;gene2862;gene2688;gene13060;gene21333;gene5354;gene19467	K04857+K04465+K12473+K04490+K09187+K09355+K00408+K08044+K16056+K08041+K09048
Human Diseases	Cancers	Prostate cancer	9	0.176156	0.673604	ko05215	gene26434;gene1330;gene14864;gene4336;gene31374;gene33808;gene21052;gene19467;gene7605	K04734+K09435+K04490+K02649+K01343+K08557+K00799+K09048+K17386
Environmental Information Processing	Signal transduction	Ras signaling pathway	15	0.17642	0.673604	ko04014	gene4975;gene2732;gene3181;gene31033;gene4336;gene8340;gene22870;gene18097;gene32083;gene25572;gene30140;gene30545;gene32803;gene7605;gene27949	K08019+K01047+K05462+K05466+K02649+K05098+K02183+K05465+K04409+K04358+K17630+K05860+K13769+K17386+K05448
Human Diseases	Cancers	Proteoglycans in cancer	14	0.184597	0.68618	ko05205	gene24404;gene4848;gene2696;gene12640;gene6991;gene4336;gene2688;gene8340;gene18195;gene32083;gene27674;gene30545;gene32803;gene27949	K06236+K06236+K06255+K08550+K16866+K02649+K00408+K05098+K16336+K04409+K16629+K05860+K13769+K05448
Organismal Systems	Endocrine system	Insulin secretion	6	0.186716	0.68618	ko04911	gene20855;gene8985;gene3599;gene13060;gene5354;gene19467	K04857+K07882+K01539+K08044+K08041+K09048
Organismal Systems	Endocrine system	Prolactin signaling pathway	6	0.186716	0.68618	ko04917	gene6111;gene12640;gene4336;gene25046;gene22963;gene29718	K04695+K08550+K02649+K04696+K08521+K04694
Cellular Processes	Cell growth and death	Ferroptosis	5	0.190048	0.689803	ko04216	gene32513;gene1958;gene28649;gene508;gene10083	K06519+K10142+K13625+K06503+K05361
Cellular Processes	Cell growth and death	Oocyte meiosis	9	0.194665	0.690932	ko04114	gene22870;gene33808;gene14961;gene13060;gene8034;gene5354;gene34246;gene30217;gene29868	K02183+K08557+K06268+K08044+K04348+K08041+K04373+K13055+K06631
Metabolism	Amino acid metabolism	Valine, leucine and isoleucine biosynthesis	1	0.195059	0.690932	ko00290	gene21427	K17989
Metabolism	Lipid metabolism	Glycerophospholipid metabolism	7	0.211545	0.731468	ko00564	gene15199;gene2732;gene30181;gene6713;gene6302;gene16838;gene1804	K15728+K01047+K01049+K00901+K00006+K18695+K00111
Environmental Information Processing	Signal transduction	Notch signaling pathway	4	0.212094	0.731468	ko04330	gene12793;gene569;gene22668;gene15552	K06051+K06054+K06057+K02599
Organismal Systems	Development	Osteoclast differentiation	9	0.213967	0.731468	ko04380	gene26434;gene17507;gene27157;gene4336;gene25046;gene14961;gene8034;gene14397;gene29718	K04734+K17332+K09455+K02649+K04696+K06268+K04348+K14380+K04694
Organismal Systems	Environmental adaptation	Circadian rhythm	3	0.223184	0.754209	ko04710	gene4674;gene27109;gene19461	K02633+K03729+K02295
Organismal Systems	Endocrine system	Thyroid hormone synthesis	5	0.228186	0.762349	ko04918	gene3599;gene13060;gene5354;gene14184;gene19467	K01539+K08044+K08041+K04249+K09048
Human Diseases	Cardiovascular diseases	Fluid shear stress and atherosclerosis	10	0.235396	0.777599	ko05418	gene22214;gene2406;gene4336;gene31374;gene8340;gene22870;gene18195;gene21052;gene7605;gene27949	K06533+K12336+K02649+K01343+K05098+K02183+K16336+K00799+K17386+K05448
Human Diseases	Substance dependence	Morphine addiction	6	0.246306	0.781049	ko05032	gene25932;gene30866;gene8984;gene4102;gene13060;gene5354	K05181+K08291+K13293+K13293+K08044+K08041
Organismal Systems	Endocrine system	Ovarian Steroidogenesis	5	0.248041	0.781049	ko04913	gene16763;gene9437;gene22963;gene13060;gene5354	K04119+K12473+K08521+K08044+K08041
Human Diseases	Cancers	Acute myeloid leukemia	5	0.248041	0.781049	ko05221	gene18544;gene27814;gene14864;gene4674;gene4336	K10055+K04702+K04490+K02633+K02649
Human Diseases	Neurodegenerative diseases	Alzheimer disease	13	0.257579	0.781049	ko05010	gene29913;gene20855;gene2077;gene434;gene22524;gene21393;gene22870;gene18198;gene29206;gene23377;gene14961;gene19502;gene8034	K05853+K04857+K03959+K03960+K02270+K13240+K02183+K00417+K02272+K03947+K06268+K03936+K04348
Organismal Systems	Digestive system	Mineral absorption	5	0.258132	0.781049	ko04978	gene13776;gene3599;gene28649;gene27526;gene22131	K04982+K01539+K13625+K05850+K14739
Organismal Systems	Nervous system	Cholinergic synapse	7	0.259161	0.781049	ko04725	gene26260;gene20855;gene4336;gene30181;gene13060;gene5354;gene19467	K04805+K04857+K02649+K01049+K08044+K08041+K09048
Metabolism	Carbohydrate metabolism	Pentose phosphate pathway	3	0.266248	0.781049	ko00030	gene4126;gene6400;gene22428	K01835+K00850+K01810
Metabolism	Amino acid metabolism	Alanine, aspartate and glutamate metabolism	3	0.266248	0.781049	ko00250	gene29691;gene26811;gene17564	K13524+K01939+K00814
Metabolism	Metabolism of other amino acids	beta-Alanine metabolism	3	0.266248	0.781049	ko00410	gene29691;gene26888;gene32712	K13524+K18966+K14755
Human Diseases	Infectious diseases	Kaposi sarcoma-associated herpesvirus infection	11	0.266838	0.781049	ko05167	gene22631;gene26434;gene17507;gene31033;gene4336;gene22870;gene14961;gene8034;gene8512;gene7605;gene27949	K15308+K04734+K17332+K05466+K02649+K02183+K06268+K04348+K05505+K17386+K05448
Organismal Systems	Immune system	C-type lectin receptor signaling pathway	7	0.26739	0.781049	ko04625	gene26434;gene17507;gene4336;gene22870;gene32083;gene14961;gene8034	K04734+K17332+K02649+K02183+K04409+K06268+K04348
Human Diseases	Cancers	Non-small cell lung cancer	5	0.268319	0.781049	ko05223	gene4336;gene9687;gene11664;gene15598;gene15003	K02649+K04402+K04402+K08524+K05119
Metabolism	Carbohydrate metabolism	Inositol phosphate metabolism	5	0.278594	0.79521	ko00562	gene24800;gene31204;gene7415;gene2248;gene30545	K05857+K18083+K01803+K05857+K05860
Organismal Systems	Endocrine system	Adipocytokine signaling pathway	5	0.278594	0.79521	ko04920	gene26434;gene9568;gene25046;gene15598;gene8145	K04734+K15013+K04696+K08524+K07202
Metabolism	Amino acid metabolism	Histidine metabolism	2	0.285239	0.800764	ko00340	gene32712;gene34067	K14755+K00274
Human Diseases	Endocrine and metabolic diseases	Non-alcoholic fatty liver disease (NAFLD)	11	0.285987	0.800764	ko04932	gene2077;gene21319;gene4336;gene434;gene22524;gene25046;gene18198;gene29206;gene23377;gene15598;gene19502	K03959+K09113+K02649+K03960+K02270+K04696+K00417+K02272+K03947+K08524+K03936
Organismal Systems	Nervous system	Long-term potentiation	5	0.299368	0.830322	ko04720	gene22870;gene14961;gene8034;gene5354;gene34246	K02183+K06268+K04348+K08041+K04373
Organismal Systems	Excretory system	Proximal tubule bicarbonate reclamation	2	0.305158	0.838472	ko04964	gene8484;gene3599	K13575+K01539
Metabolism	Metabolism of cofactors and vitamins	Folate biosynthesis	3	0.310178	0.844373	ko00790	gene16763;gene28998;gene2702	K04119+K15631+K01077
Metabolism	Lipid metabolism	alpha-Linolenic acid metabolism	2	0.324972	0.872395	ko00592	gene2732;gene32458	K01047+K10226
Organismal Systems	Digestive system	Bile secretion	7	0.326695	0.872395	ko04976	gene9437;gene34865;gene8484;gene3599;gene15598;gene13060;gene5354	K12473+K05673+K13575+K01539+K08524+K08044+K08041
Human Diseases	Drug resistance	Endocrine resistance	6	0.329374	0.872395	ko01522	gene12793;gene12640;gene4336;gene13060;gene5354;gene15552	K06051+K08550+K02649+K08044+K08041+K02599
Organismal Systems	Endocrine system	Progesterone-mediated oocyte maturation	6	0.338868	0.883601	ko04914	gene29954;gene4336;gene13060;gene5354;gene34246;gene29868	K10403+K02649+K08044+K08041+K04373+K06631
Human Diseases	Neurodegenerative diseases	Prion diseases	3	0.339616	0.883601	ko05020	gene25601;gene15552;gene15625	K03996+K02599+K03999
Metabolism	Glycan biosynthesis and metabolism	Glycosaminoglycan biosynthesis - heparan sulfate / heparin	2	0.344636	0.888797	ko00534	gene3800;gene32479	K02369+K10158
Metabolism	Metabolism of cofactors and vitamins	Vitamin B6 metabolism	1	0.352153	0.891426	ko00750	gene1226	K00868
Human Diseases	Cancers	Glioma	5	0.352188	0.891426	ko05214	gene4336;gene22870;gene9687;gene11664;gene7605	K02649+K02183+K04402+K04402+K17386
Human Diseases	Cancers	Endometrial cancer	4	0.354751	0.891426	ko05213	gene14864;gene4336;gene9687;gene11664	K04490+K02649+K04402+K04402
Human Diseases	Cancers	MicroRNAs in cancer	10	0.365669	0.907129	ko05206	gene27814;gene3181;gene6991;gene4336;gene29400;gene31710;gene15552;gene7605;gene27949;gene29718	K04702+K05462+K16866+K02649+K10145+K08270+K02599+K17386+K05448+K04694
Organismal Systems	Digestive system	Carbohydrate digestion and absorption	3	0.368969	0.907129	ko04973	gene18627;gene4336;gene3599	K08171+K02649+K01539
Organismal Systems	Endocrine system	Estrogen signaling pathway	7	0.370257	0.907129	ko04915	gene12640;gene4336;gene22870;gene27771;gene13060;gene5354;gene19467	K08550+K02649+K02183+K09571+K08044+K08041+K09048
Organismal Systems	Immune system	T cell receptor signaling pathway	6	0.377081	0.916213	ko04660	gene26434;gene17507;gene4336;gene32083;gene14961;gene8034	K04734+K17332+K02649+K04409+K06268+K04348
Human Diseases	Cancers	Basal cell carcinoma	4	0.391305	0.94298	ko05217	gene14864;gene2688;gene9687;gene11664	K04490+K00408+K04402+K04402
Metabolism	Carbohydrate metabolism	Butanoate metabolism	2	0.402358	0.953977	ko00650	gene29691;gene13598	K13524+K00109
Metabolism	Lipid metabolism	Biosynthesis of unsaturated fatty acids	2	0.402358	0.953977	ko01040	gene32458;gene32457	K10226+K10224
Human Diseases	Neurodegenerative diseases	Huntington disease	13	0.409298	0.954941	ko05016	gene20136;gene32837;gene2077;gene434;gene22524;gene18198;gene29206;gene23377;gene27831;gene19502;gene17259;gene8145;gene19467	K10408+K03007+K03959+K03960+K02270+K00417+K02272+K03947+K10408+K03936+K05625+K07202+K09048
Metabolism	Carbohydrate metabolism	Pyruvate metabolism	3	0.412509	0.954941	ko00620	gene13030;gene34254;gene32135	K00873+K00161+K00016
Organismal Systems	Excretory system	Endocrine and other factor-regulated calcium reabsorption	3	0.412509	0.954941	ko04961	gene12640;gene3599;gene27526	K08550+K01539+K05850
Metabolism	Carbohydrate metabolism	Galactose metabolism	2	0.421073	0.959654	ko00052	gene4126;gene6400	K01835+K00850
Organismal Systems	Development	Dorso-ventral axis formation	2	0.421073	0.959654	ko04320	gene15552;gene21237	K02599+K02156
Cellular Processes	Cell growth and death	p53 signaling pathway	5	0.426602	0.959941	ko04115	gene1958;gene19447;gene29400;gene9687;gene11664	K10142+K06509+K10145+K04402+K04402
Metabolism	Global and overview maps	Metabolic pathways	71	0.427729	0.959941	ko01100	gene29691;gene12185;gene22477;gene4502;gene33681;gene4126;gene15199;gene2732;gene16995;gene19405;gene18756;gene32837;gene10593;gene26888;gene9568;gene11071;gene16763;gene33861;gene13030;gene2077;gene23832;gene29524;gene31394;gene1798;gene15152;gene26811;gene29055;gene26855;gene3567;gene24800;gene434;gene21393;gene14761;gene1226;gene15392;gene3800;gene32479;gene29076;gene17564;gene31204;gene34254;…	K13524+K02350+K10705+K01081+K00927+K01835+K15728+K01047+K06240+K13997+K00710+K03007+K00933+K18966+K15013+K00506+K04119+K01824+K00873+K03959+K13241+K19269+K00746+K00710+K01081+K01939+K09673+K01834+K00058+K05857+K03960+K13240+K08678+K00868+K00939+K02369+K10158+K06240+K00814+K18083+K00161+K11146+K00417+K01803+K01689+K05857+K01197+K01197+K00901+K10250+K02272+K00016+K03947+K00850+K00274+K07970+K00819+…
Organismal Systems	Aging	Longevity regulating pathway - mammal	5	0.437142	0.966315	ko04211	gene4336;gene13060;gene5354;gene8145;gene19467	K02649+K08044+K08041+K07202+K09048
Organismal Systems	Immune system	B cell receptor signaling pathway	5	0.437142	0.966315	ko04662	gene26434;gene17507;gene4336;gene14961;gene8034	K04734+K17332+K02649+K06268+K04348
Metabolism	Metabolism of cofactors and vitamins	Nicotinate and nicotinamide metabolism	2	0.457569	0.996484	ko00760	gene4502;gene15152	K01081+K01081
Environmental Information Processing	Signal transduction	Hippo signaling pathway - multiple species	2	0.457569	0.996484	ko04392	gene32083;gene18744	K04409+K09448
Environmental Information Processing	Signal transduction	AMPK signaling pathway	7	0.466502	0.999838	ko04152	gene19995;gene4336;gene29843;gene16476;gene6400;gene8145;gene19467	K19029+K02649+K08292+K01103+K00850+K07202+K09048
Organismal Systems	Nervous system	GABAergic synapse	5	0.468479	0.999838	ko04727	gene29691;gene25932;gene20855;gene13060;gene5354	K13524+K05181+K04857+K08044+K08041
Metabolism	Lipid metabolism	Fatty acid biosynthesis	1	0.478655	0.999838	ko00061	gene9568	K15013
Organismal Systems	Endocrine system	GnRH signaling pathway	5	0.478809	0.999838	ko04912	gene20855;gene22870;gene22963;gene13060;gene5354	K04857+K02183+K08521+K08044+K08041
Environmental Information Processing	Signal transduction	mTOR signaling pathway	8	0.485465	0.999838	ko04150	gene32513;gene15199;gene4336;gene2688;gene31710;gene29363;gene11465;gene34246	K06519+K15728+K02649+K00408+K08270+K15705+K16185+K04373
Organismal Systems	Excretory system	Aldosterone-regulated sodium reabsorption	2	0.492702	0.999838	ko04960	gene4336;gene3599	K02649+K01539
Organismal Systems	Nervous system	Retrograde endocannabinoid signaling	8	0.493443	0.999838	ko04723	gene25932;gene20855;gene2077;gene434;gene23377;gene13060;gene19502;gene5354	K05181+K04857+K03959+K03960+K03947+K08044+K03936+K08041
Organismal Systems	Endocrine system	Insulin signaling pathway	8	0.493443	0.999838	ko04910	gene6111;gene22053;gene4336;gene22870;gene25046;gene33736;gene8145;gene29718	K04695+K07190+K02649+K02183+K04696+K07190+K07202+K04694
Human Diseases	Cancers	Viral carcinogenesis	11	0.495985	0.999838	ko05203	gene26434;gene13030;gene28590;gene28597;gene28604;gene4336;gene28618;gene28619;gene28587;gene6407;gene19467	K04734+K00873+K11254+K11252+K11252+K02649+K11252+K11252+K11252+K11408+K09048
Organismal Systems	Immune system	Th17 cell differentiation	5	0.499262	0.999838	ko04659	gene26434;gene17507;gene15598;gene14961;gene8034	K04734+K17332+K08524+K06268+K04348
Metabolism	Carbohydrate metabolism	Starch and sucrose metabolism	2	0.509722	0.999838	ko00500	gene4126;gene22428	K01835+K01810
Cellular Processes	Transport and catabolism	Autophagy - other eukaryotes	2	0.509722	0.999838	ko04136	gene2272;gene33563	K17907+K08342
Metabolism	Carbohydrate metabolism	Amino sugar and nucleotide sugar metabolism	3	0.522895	0.999838	ko00520	gene4126;gene14761;gene22428	K01835+K08678+K01810
Metabolism	Carbohydrate metabolism	Propanoate metabolism	2	0.526365	0.999838	ko00640	gene29691;gene32135	K13524+K00016
Human Diseases	Infectious diseases	HTLV-I infection	13	0.528073	0.999838	ko05166	gene22631;gene26434;gene16497;gene17507;gene20737;gene4336;gene2688;gene14961;gene13060;gene8034;gene5354;gene8955;gene7605	K15308+K04734+K09052+K17332+K09032+K02649+K00408+K06268+K08044+K04348+K08041+K15309+K17386
Human Diseases	Infectious diseases	Human cytomegalovirus infection	11	0.529481	0.999838	ko05163	gene26434;gene17507;gene4336;gene27721;gene22870;gene14961;gene13060;gene8034;gene5354;gene19467;gene27949	K04734+K17332+K02649+K08058+K02183+K06268+K08044+K04348+K08041+K09048+K05448
Human Diseases	Cancers	Renal cell carcinoma	4	0.531964	0.999838	ko05211	gene4336;gene32083;gene7605;gene27949	K02649+K04409+K17386+K05448
Metabolism	Global and overview maps	Fatty acid metabolism	3	0.535905	0.999838	ko01212	gene9568;gene32458;gene32457	K15013+K10226+K10224
Organismal Systems	Nervous system	Glutamatergic synapse	6	0.536461	0.999838	ko04724	gene4547;gene7836;gene14961;gene13060;gene8034;gene5354	K05203+K15009+K06268+K08044+K04348+K08041
Metabolism	Amino acid metabolism	Tyrosine metabolism	2	0.542622	0.999838	ko00350	gene11071;gene34067	K00506+K00274
Environmental Information Processing	Signal transduction	Jak-STAT signaling pathway	7	0.542647	0.999838	ko04630	gene11529;gene27814;gene6111;gene4336;gene25046;gene7605;gene29718	K05059+K04702+K04695+K02649+K04696+K17386+K04694
Metabolism	Lipid metabolism	Arachidonic acid metabolism	4	0.543002	0.999838	ko00590	gene2732;gene16763;gene9077;gene21708	K01047+K04119+K17726+K18592
Organismal Systems	Aging	Longevity regulating pathway - multiple species	3	0.548711	0.999838	ko04213	gene4336;gene13060;gene5354	K02649+K08044+K08041
Human Diseases	Neurodegenerative diseases	Amyotrophic lateral sclerosis (ALS)	3	0.548711	0.999838	ko05014	gene21393;gene14961;gene8034	K13240+K06268+K04348
Cellular Processes	Cell growth and death	Cellular senescence	8	0.55581	0.999838	ko04218	gene13776;gene17507;gene4336;gene22870;gene9687;gene11664;gene14961;gene8034	K04982+K17332+K02649+K02183+K04402+K04402+K06268+K04348
Organismal Systems	Environmental adaptation	Circadian entrainment	5	0.558609	0.999838	ko04713	gene4674;gene21393;gene22870;gene13060;gene5354	K02633+K13240+K02183+K08044+K08041
Human Diseases	Cancers	Gastric cancer	7	0.558979	0.999838	ko05226	gene14864;gene4336;gene2688;gene9687;gene25572;gene11664;gene15598	K04490+K02649+K00408+K04402+K04358+K04402+K08524
Organismal Systems	Sensory system	Inflammatory mediator regulation of TRP channels	5	0.577608	0.999838	ko04750	gene4336;gene22870;gene13060;gene5354;gene19239	K02649+K02183+K08044+K08041+K04269
Metabolism	Lipid metabolism	Steroid biosynthesis	1	0.58051	0.999838	ko00100	gene33861	K01824
Environmental Information Processing	Signal transduction	Wnt signaling pathway	7	0.58298	0.999838	ko04310	gene17507;gene25826;gene14864;gene20336;gene2688;gene14961;gene8034	K17332+K03213+K04490+K04493+K00408+K06268+K04348
Human Diseases	Infectious diseases	Chagas disease (American trypanosomiasis)	5	0.596168	0.999838	ko05142	gene26434;gene23832;gene4336;gene24858;gene5354	K04734+K13241+K02649+K01283+K08041
Human Diseases	Cancers	Choline metabolism in cancer	5	0.596168	0.999838	ko05231	gene4336;gene6713;gene16838;gene9417;gene7605	K02649+K00901+K18695+K15377+K17386
Cellular Processes	Transport and catabolism	Mitophagy - animal	3	0.597794	0.999838	ko04137	gene27157;gene2272;gene27874	K09455+K17907+K15590
Metabolism	Energy metabolism	Oxidative phosphorylation	8	0.600394	0.999838	ko00190	gene2077;gene30926;gene434;gene22524;gene18198;gene29206;gene23377;gene19502	K03959+K11725+K03960+K02270+K00417+K02272+K03947+K03936
Metabolism	Energy metabolism	Nitrogen metabolism	1	0.602705	0.999838	ko00910	gene3383	K01672
Human Diseases	Immune diseases	Autoimmune thyroid disease	1	0.62373	0.999838	ko05320	gene14184	K04249
Metabolism	Metabolism of other amino acids	Glutathione metabolism	3	0.632245	0.999838	ko00480	gene21052;gene10083;gene21708	K00799+K05361+K18592
Human Diseases	Drug resistance	EGFR tyrosine kinase inhibitor resistance	4	0.635814	0.999838	ko01521	gene4336;gene8340;gene7605;gene27949	K02649+K05098+K17386+K05448
Metabolism	Global and overview maps	2-Oxocarboxylic acid metabolism	1	0.643645	0.999838	ko01210	gene17564	K00814
Organismal Systems	Immune system	Cytosolic DNA-sensing pathway	2	0.64534	0.999838	ko04623	gene26434;gene32837	K04734+K03007
Environmental Information Processing	Signal transduction	FoxO signaling pathway	6	0.64563	0.999838	ko04068	gene3793;gene4462;gene4336;gene9687;gene11664;gene29868	K04288+K17847+K02649+K04402+K04402+K06631
Organismal Systems	Immune system	Chemokine signaling pathway	8	0.649438	0.999838	ko04062	gene26434;gene30866;gene23773;gene4336;gene32083;gene13060;gene5354;gene8512	K04734+K08291+K05514+K02649+K04409+K08044+K08041+K05505
Human Diseases	Cancers	Pancreatic cancer	4	0.663901	0.999838	ko05212	gene4336;gene9687;gene11664;gene27949	K02649+K04402+K04402+K05448
Human Diseases	Cancers	Chronic myeloid leukemia	4	0.663901	0.999838	ko05220	gene26434;gene4336;gene9687;gene11664	K04734+K02649+K04402+K04402
Organismal Systems	Environmental adaptation	Thermogenesis	12	0.665591	0.999838	ko04714	gene2077;gene434;gene22524;gene18198;gene29206;gene23377;gene13060;gene19502;gene5354;gene8145;gene34246;gene19467	K03959+K03960+K02270+K00417+K02272+K03947+K08044+K03936+K08041+K07202+K04373+K09048
Human Diseases	Infectious diseases	Malaria	2	0.671129	0.999838	ko05144	gene20234;gene18195	K06496+K16336
Environmental Information Processing	Membrane transport	ABC transporters	4	0.672929	0.999838	ko02010	gene686;gene34865;gene33325;gene29532	K05668+K05673+K05675+K05643
Metabolism	Carbohydrate metabolism	Pentose and glucuronate interconversions	1	0.680376	0.999838	ko00040	gene22958	K00078
Metabolism	Glycan biosynthesis and metabolism	Other types of O-glycan biosynthesis	1	0.680376	0.999838	ko00514	gene20677	K11703
Human Diseases	Infectious diseases	African trypanosomiasis	2	0.69538	0.999838	ko05143	gene7024;gene7020	K14480+K14480
Human Diseases	Infectious diseases	Hepatitis C	5	0.704869	0.999838	ko05160	gene26434;gene9437;gene4336;gene25046;gene15598	K04734+K12473+K02649+K04696+K08524
Metabolism	Metabolism of cofactors and vitamins	Retinol metabolism	2	0.706942	0.999838	ko00830	gene6724;gene20285	K00061+K11146
Organismal Systems	Excretory system	Vasopressin-regulated water reabsorption	2	0.706942	0.999838	ko04962	gene21486;gene19467	K10418+K09048
Human Diseases	Cardiovascular diseases	Viral myocarditis	2	0.706942	0.999838	ko05416	gene24406;gene27380	K12565+K06265
Human Diseases	Cancers	Colorectal cancer	4	0.707358	0.999838	ko05210	gene14864;gene4336;gene9687;gene11664	K04490+K02649+K04402+K04402
Environmental Information Processing	Signal transduction	TNF signaling pathway	5	0.712322	0.999838	ko04668	gene26434;gene4336;gene25046;gene19467;gene8512	K04734+K02649+K04696+K09048+K05505
Metabolism	Amino acid metabolism	Phenylalanine metabolism	1	0.71333	0.999838	ko00360	gene34067	K00274
Organismal Systems	Sensory system	Phototransduction	1	0.71333	0.999838	ko04744	gene22870	K02183
Human Diseases	Endocrine and metabolic diseases	Type I diabetes mellitus	1	0.71333	0.999838	ko04940	gene5947	K07817
Organismal Systems	Endocrine system	PPAR signaling pathway	3	0.713835	0.999838	ko03320	gene9568;gene15598;gene32458	K15013+K08524+K10226
Human Diseases	Infectious diseases	Legionellosis	3	0.722984	0.999838	ko05134	gene26434;gene2071;gene8512	K04734+K08823+K05505
Metabolism	Metabolism of terpenoids and polyketides	Terpenoid backbone biosynthesis	1	0.728513	0.999838	ko00900	gene20394	K00587
Metabolism	Amino acid metabolism	Cysteine and methionine metabolism	2	0.728969	0.999838	ko00270	gene32135;gene21427	K00016+K17989
Human Diseases	Substance dependence	Cocaine addiction	2	0.728969	0.999838	ko05030	gene34067;gene19467	K00274+K09048
Cellular Processes	Cellular community - eukaryotes	Tight junction	7	0.730493	0.999838	ko04530	gene25410;gene3061;gene29773;gene24250;gene24254;gene24251;gene24252	K17291+K06448+K10352+K10352+K10352+K10352+K10352
Cellular Processes	Cellular community - eukaryotes	Adherens junction	3	0.740597	0.999838	ko04520	gene6483;gene14864;gene18651	K05694+K04490+K06081
Metabolism	Glycan biosynthesis and metabolism	Glycosylphosphatidylinositol(GPI)-anchor biosynthesis	1	0.742895	0.999838	ko00563	gene533	K08098
Organismal Systems	Digestive system	Vitamin digestion and absorption	1	0.756516	0.999838	ko04977	gene15048	K14386
Human Diseases	Infectious diseases	Epithelial cell signaling in Helicobacter pylori infection	3	0.757312	0.999838	ko05120	gene26434;gene32083;gene8512	K04734+K04409+K05505
Organismal Systems	Nervous system	Neurotrophin signaling pathway	5	0.760776	0.999838	ko04722	gene26434;gene4336;gene22870;gene27060;gene34246	K04734+K02649+K02183+K04731+K04373
Metabolism	Glycan biosynthesis and metabolism	Glycosphingolipid biosynthesis - lacto and neolacto series	1	0.769418	0.999838	ko00601	gene9001	K07970
Genetic Information Processing	Transcription	RNA polymerase	1	0.769418	0.999838	ko03020	gene32837	K03007
Metabolism	Xenobiotics biodegradation and metabolism	Drug metabolism - cytochrome P450	2	0.777964	0.999838	ko00982	gene21052;gene34067	K00799+K00274
Human Diseases	Neurodegenerative diseases	Parkinson disease	7	0.78139	0.999838	ko05012	gene2077;gene434;gene22524;gene18198;gene29206;gene23377;gene19502	K03959+K03960+K02270+K00417+K02272+K03947+K03936
Human Diseases	Cancers	Hepatocellular carcinoma	7	0.78139	0.999838	ko05225	gene14864;gene4336;gene2688;gene9687;gene21052;gene11664;gene32803	K04490+K02649+K00408+K04402+K00799+K04402+K13769
Environmental Information Processing	Signal transduction	NF-kappa B signaling pathway	4	0.781703	0.999838	ko04064	gene26434;gene9687;gene11664;gene8512	K04734+K04402+K04402+K05505
Cellular Processes	Transport and catabolism	Autophagy - animal	5	0.785578	0.999838	ko04140	gene2272;gene4336;gene31710;gene11465;gene33563	K17907+K02649+K08270+K16185+K08342
Genetic Information Processing	Replication and repair	Fanconi anemia pathway	2	0.786781	0.999838	ko03460	gene12185;gene569	K02350+K06054
Human Diseases	Infectious diseases	Leishmaniasis	2	0.786781	0.999838	ko05140	gene26434;gene23832	K04734+K13241
Metabolism	Lipid metabolism	Fatty acid elongation	1	0.793211	0.999838	ko00062	gene25482	K10250
Metabolism	Lipid metabolism	Linoleic acid metabolism	1	0.793211	0.999838	ko00591	gene2732	K01047
Environmental Information Processing	Signal transduction	Hedgehog signaling pathway - fly	1	0.793211	0.999838	ko04341	gene30866	K08291
Metabolism	Lipid metabolism	Glycerolipid metabolism	2	0.79529	0.999838	ko00561	gene15199;gene6713	K15728+K00901
Cellular Processes	Transport and catabolism	Lysosome	5	0.802842	0.999838	ko04142	gene25250;gene2242;gene27348;gene27347;gene24677	K12381+K12347+K01197+K01197+K01205
Organismal Systems	Sensory system	Phototransduction - fly	1	0.804173	0.999838	ko04745	gene22870	K02183
Human Diseases	Immune diseases	Rheumatoid arthritis	3	0.809062	0.999838	ko05323	gene18097;gene8512;gene27949	K05465+K05505+K05448
Organismal Systems	Immune system	Complement and coagulation cascades	3	0.815641	0.999838	ko04610	gene31374;gene25601;gene15625	K01343+K03996+K03999
Organismal Systems	Immune system	Hematopoietic cell lineage	3	0.815641	0.999838	ko04640	gene1654;gene3061;gene508	K06485+K06448+K06503
Metabolism	Metabolism of cofactors and vitamins	Porphyrin and chlorophyll metabolism	1	0.824389	0.999838	ko00860	gene18630	K01749
Metabolism	Xenobiotics biodegradation and metabolism	Metabolism of xenobiotics by cytochrome P450	2	0.826393	0.999838	ko00980	gene21052;gene22958	K00799+K00078
Human Diseases	Drug resistance	Platinum drug resistance	3	0.828225	0.999838	ko01524	gene12185;gene4336;gene21052	K02350+K02649+K00799
Human Diseases	Infectious diseases	Tuberculosis	6	0.835244	0.999838	ko05152	gene23832;gene22870;gene24846;gene27060;gene14961;gene8034	K13241+K02183+K06560+K04731+K06268+K04348
Metabolism	Carbohydrate metabolism	Citrate cycle (TCA cycle)	1	0.842523	0.999838	ko00020	gene34254	K00161
Human Diseases	Infectious diseases	Hepatitis B	5	0.8481	0.999838	ko05161	gene26434;gene17507;gene2696;gene4336;gene19467	K04734+K17332+K06255+K02649+K09048
Metabolism	Carbohydrate metabolism	Glyoxylate and dicarboxylate metabolism	1	0.850877	0.999838	ko00630	gene29524	K19269
Human Diseases	Substance dependence	Nicotine addiction	1	0.850877	0.999838	ko05033	gene25932	K05181
Environmental Information Processing	Signal transduction	Phospholipase D signaling pathway	5	0.852556	0.999838	ko04072	gene4336;gene6713;gene13060;gene5354;gene7605	K02649+K00901+K08044+K08041+K17386
Human Diseases	Drug resistance	Antifolate resistance	2	0.853186	0.999838	ko01523	gene686;gene34865	K05668+K05673
Cellular Processes	Cellular community - eukaryotes	Gap junction	3	0.856508	0.999838	ko04540	gene13060;gene5354;gene7605	K08044+K08041+K17386
Genetic Information Processing	Replication and repair	DNA replication	1	0.858789	0.999838	ko03030	gene9291	K10743
Organismal Systems	Digestive system	Fat digestion and absorption	1	0.858789	0.999838	ko04975	gene2732	K01047
Human Diseases	Immune diseases	Primary immunodeficiency	1	0.858789	0.999838	ko05340	gene21333	K16056
Cellular Processes	Cell growth and death	Apoptosis	5	0.865277	0.999838	ko04210	gene26434;gene9689;gene4336;gene9687;gene11664	K04734+K07611+K02649+K04402+K04402
Metabolism	Nucleotide metabolism	Pyrimidine metabolism	3	0.866632	0.999838	ko00240	gene4502;gene32837;gene15152	K01081+K03007+K01081
Metabolism	Amino acid metabolism	Lysine degradation	2	0.870751	0.999838	ko00310	gene20677;gene6340	K11703+K09187
Genetic Information Processing	Folding, sorting and degradation	SNARE interactions in vesicular transport	1	0.873379	0.999838	ko04130	gene7441	K08510
Environmental Information Processing	Signal transduction	Hippo signaling pathway -fly	2	0.876164	0.999838	ko04391	gene12678;gene18744	K16675+K09448
Organismal Systems	Digestive system	Cholesterol metabolism	1	0.886465	0.999838	ko04979	gene9437	K12473
Organismal Systems	Immune system	Fc gamma R-mediated phagocytosis	3	0.889239	0.999838	ko04666	gene4336;gene25729;gene32083	K02649+K12559+K04409
Human Diseases	Cancers	Bladder cancer	1	0.892493	0.999838	ko05219	gene27949	K05448
Metabolism	Lipid metabolism	Ether lipid metabolism	1	0.898202	0.999838	ko00565	gene2732	K01047
Metabolism	Lipid metabolism	Fatty acid degradation	1	0.903609	0.999838	ko00071	gene9568	K15013
Metabolism	Amino acid metabolism	Tryptophan metabolism	1	0.903609	0.999838	ko00380	gene34067	K00274
Organismal Systems	Nervous system	Dopaminergic synapse	4	0.909557	0.999838	ko04728	gene22870;gene34067;gene8034;gene19467	K02183+K00274+K04348+K09048
Environmental Information Processing	Signal transduction	ErbB signaling pathway	2	0.912494	0.999838	ko04012	gene4336;gene32083	K02649+K04409
Organismal Systems	Immune system	IL-17 signaling pathway	2	0.91626	0.999838	ko04657	gene26434;gene8512	K04734+K05505
Organismal Systems	Nervous system	Serotonergic synapse	3	0.918352	0.999838	ko04726	gene25932;gene20855;gene34067	K05181+K04857+K00274
Genetic Information Processing	Folding, sorting and degradation	Ubiquitin mediated proteolysis	5	0.91852	0.999838	ko04120	gene31596;gene11863;gene10051;gene25046;gene29718	K07868+K10607+K02207+K04696+K04694
Organismal Systems	Immune system	Toll and Imd signaling pathway	1	0.922518	0.999838	ko04624	gene26434	K04734
Cellular Processes	Cellular community - eukaryotes	Signaling pathways regulating pluripotency of stem cells	4	0.924094	0.999838	ko04550	gene28736;gene6025;gene4336;gene2688	K11478+K18484+K02649+K00408
Organismal Systems	Immune system	Leukocyte transendothelial migration	3	0.924451	0.999838	ko04670	gene22214;gene29965;gene4336	K06533+K12758+K02649
Organismal Systems	Aging	Longevity regulating pathway - worm	2	0.926666	0.999838	ko04212	gene21052;gene22131	K00799+K14739
Genetic Information Processing	Folding, sorting and degradation	RNA degradation	2	0.932914	0.999838	ko03018	gene24076;gene6400	K01689+K00850
Human Diseases	Infectious diseases	Pertussis	2	0.932914	0.999838	ko05133	gene23832;gene22870	K13241+K02183
Organismal Systems	Immune system	RIG-I-like receptor signaling pathway	1	0.934229	0.999838	ko04622	gene26434	K04734
Cellular Processes	Cell growth and death	Cell cycle	4	0.936501	0.999838	ko04110	gene9687;gene1042;gene11664;gene29868	K04402+K09392+K04402+K06631
Human Diseases	Infectious diseases	Herpes simplex infection	5	0.937424	0.999838	ko05168	gene26434;gene4674;gene18651;gene10051;gene25046	K04734+K02633+K06081+K02207+K04696
Human Diseases	Infectious diseases	Vibrio cholerae infection	1	0.937726	0.999838	ko05110	gene9755	K10951
Environmental Information Processing	Signaling molecules and interaction	Cytokine-cytokine receptor interaction	7	0.940632	0.999838	ko04060	gene11529;gene23773;gene6251;gene19243;gene8512;gene1487;gene33812	K05059+K05514+K13594+K05156+K05505+K05497+K05163
Metabolism	Amino acid metabolism	Valine, leucine and isoleucine degradation	1	0.941037	0.999838	ko00280	gene29691	K13524
Human Diseases	Infectious diseases	Staphylococcus aureus infection	1	0.941037	0.999838	ko05150	gene20234	K06496
Cellular Processes	Transport and catabolism	Peroxisome	2	0.94393	0.999838	ko04146	gene23832;gene33325	K13241+K05675
Organismal Systems	Nervous system	Long-term depression	1	0.949955	0.999838	ko04730	gene21393	K13240
Organismal Systems	Sensory system	Taste transduction	1	0.949955	0.999838	ko04742	gene13060	K08044
Organismal Systems	Immune system	Toll-like receptor signaling pathway	2	0.951041	0.999838	ko04620	gene26434;gene4336	K04734+K02649
Cellular Processes	Cell growth and death	Necroptosis	5	0.952306	0.999838	ko04217	gene8892;gene13776;gene17475;gene28428;gene28649	K11251+K04982+K17595+K11251+K13625
Metabolism	Lipid metabolism	Steroid hormone biosynthesis	1	0.952618	0.999838	ko00140	gene16763	K04119
Cellular Processes	Cell growth and death	Apoptosis - fly	1	0.95514	0.999838	ko04214	gene9689	K07611
Environmental Information Processing	Signal transduction	Hippo signaling pathway	4	0.955964	0.999838	ko04390	gene25826;gene14864;gene2688;gene18744	K03213+K04490+K00408+K09448
Organismal Systems	Immune system	Antigen processing and presentation	1	0.959788	0.999838	ko04612	gene27721	K08058
Human Diseases	Infectious diseases	Influenza A	4	0.96063	0.999838	ko05164	gene26434;gene4336;gene20690;gene25046	K04734+K02649+K15046+K04696
Organismal Systems	Immune system	Fc epsilon RI signaling pathway	1	0.961929	0.999838	ko04664	gene4336	K02649
Organismal Systems	Nervous system	Synaptic vesicle cycle	1	0.963956	0.999838	ko04721	gene8985	K07882
Organismal Systems	Immune system	NOD-like receptor signaling pathway	3	0.970102	0.999838	ko04621	gene26434;gene13776;gene8512	K04734+K04982+K05505
Human Diseases	Cancers	Chemical carcinogenesis	1	0.972587	0.999838	ko05204	gene21052	K00799
Metabolism	Xenobiotics biodegradation and metabolism	Drug metabolism - other enzymes	1	0.975431	0.999838	ko00983	gene21052	K00799
Cellular Processes	Transport and catabolism	Phagosome	3	0.980356	0.999838	ko04145	gene21393;gene24846;gene508	K13240+K06560+K06503
Human Diseases	Infectious diseases	Shigellosis	1	0.98132	0.999838	ko05131	gene26434	K04734
Environmental Information Processing	Signal transduction	Sphingolipid signaling pathway	2	0.985371	0.999838	ko04071	gene3793;gene4336	K04288+K02649
Human Diseases	Infectious diseases	Bacterial invasion of epithelial cells	1	0.9858	0.999838	ko05100	gene4336	K02649
Environmental Information Processing	Signal transduction	TGF-beta signaling pathway	1	0.986558	0.999838	ko04350	gene2742	K19558
Human Diseases	Infectious diseases	Measles	2	0.986696	0.999838	ko05162	gene26434;gene4336	K04734+K02649
Human Diseases	Infectious diseases	Pathogenic Escherichia coli infection	1	0.992238	0.999838	ko05130	gene10762	K11294
Cellular Processes	Transport and catabolism	Endocytosis	5	0.995977	0.999838	ko04144	gene10317;gene30866;gene15365;gene9437;gene508	K12490+K08291+K12186+K12473+K06503
Organismal Systems	Sensory system	Olfactory transduction	2	0.997036	0.999838	ko04740	gene22870;gene30401	K02183+K04257
Genetic Information Processing	Translation	Ribosome	9	0.997523	0.999838	ko03010	gene25198;gene15351;gene13573;gene25603;gene24511;gene27947;gene26133;gene24982;gene34444	K02923+K02918+K02980+K02922+K02894+K02963+K02962+K02935+K02998
Human Diseases	Infectious diseases	Epstein-Barr virus infection	3	0.997855	0.999838	ko05169	gene26434;gene32837;gene4336	K04734+K03007+K02649
Genetic Information Processing	Folding, sorting and degradation	Protein processing in endoplasmic reticulum	2	0.999429	0.999838	ko04141	gene18977;gene28094	K04523+K10666
Genetic Information Processing	Transcription	Spliceosome	1	0.999838	0.999838	ko03040	gene8207	K12741
Legend
KEGG_A_class	Name of KEGG class a annotation pathway
KEGG_B_class	Name of KEGG class b annotation pathway
Pathway	Pathway name
num	Number of genes enriched in the pathway
Pvalue（P）	Statistical p-value obtained according to significance test method
Qvalue	Corrected p-Value
Pathway ID	Pathway ID account
Genes	Name of genes enriched in the pathway
K_IDs	KEGG ID of genes enriched in the pathway

## Sheet: Down mRNA KEGG 
KEGG_A_class	KEGG_B_class	Pathway	num	Pvalue	Qvalue	Pathway ID	Genes	K_IDs
Metabolism	Xenobiotics biodegradation and metabolism	Drug metabolism - other enzymes	5	0.0499182	0.524811	ko00983	gene7191;gene3721;gene3724;gene27401;gene2718	K00799+K00799+K00799+K00088+K01489
Cellular Processes	Cell motility	Regulation of actin cytoskeleton	11	0.0518825	0.524811	ko04810	gene30014;gene979;gene10510;gene1261;gene18729;gene24225;gene10312;gene33434;gene16000;gene20141;gene29138	K06462+K05759+K05749+K06464+K07830+K10352+K05740+K05741+K04358+K05746+K12757
Metabolism	Amino acid metabolism	Arginine and proline metabolism	4	0.0593728	0.578335	ko00330	gene30603;gene14008;gene21524;gene34234	K18123+K01476+K00273+K00802
Human Diseases	Immune diseases	Systemic lupus erythematosus	7	0.0714098	0.670742	ko05322	gene28104;gene20044;gene2682;gene3408;gene28114;gene11881;gene25616	K03989+K11089+K03986+K06498+K01332+K03994+K04000
Metabolism	Carbohydrate metabolism	Glycolysis / Gluconeogenesis	5	0.0768212	0.696689	ko00010	gene11586;gene32039;gene24705;gene17043;gene7154	K03841+K00016+K01084+K01596+K00016
Metabolism	Biosynthesis of other secondary metabolites	Caffeine metabolism	1	0.086071	0.754556	ko00232	gene3998	K00365
Metabolism	Global and overview maps	Metabolic pathways	46	0.113095	0.929695	ko01100	gene30603;gene3998;gene2064;gene27690;gene1920;gene2731;gene26968;gene14008;gene29811;gene18723;gene2609;gene32018;gene6709;gene27401;gene6658;gene18769;gene29812;gene1710;gene10939;gene15267;gene12867;gene21524;gene29193;gene14996;gene2718;gene17903;gene30716;gene7137;gene26087;gene11586;gene473;gene8627;gene8623;gene32039;gene3571;gene8273;gene24705;gene1360;gene28230;gene25660;gene21426;gene34…	K18123+K00365+K00157+K11204+K03392+K01047+K00854+K01476+K01896+K07419+K01062+K00029+K00387+K00088+K11154+K01490+K01896+K04710+K00772+K00509+K09663+K00273+K01092+K00710+K01489+K00411+K01081+K00826+K11140+K03841+K10703+K00981+K13506+K00016+K11517+K02564+K01084+K00710+K03000+K01796+K17989+K00802+K10203+K01596+K00016+K00864
Metabolism	Nucleotide metabolism	Purine metabolism	8	0.117948	0.929695	ko00230	gene3998;gene18724;gene27401;gene18769;gene17901;gene30716;gene22078;gene28230	K00365+K13296+K00088+K01490+K18436+K01081+K08047+K03000
Organismal Systems	Immune system	Cytosolic DNA-sensing pathway	3	0.119884	0.929695	ko04623	gene11099;gene8538;gene10234	K12967+K12671+K12654
Environmental Information Processing	Signal transduction	Apelin signaling pathway	7	0.120189	0.929695	ko04371	gene13437;gene18724;gene18729;gene26081;gene22711;gene7292;gene22078	K04963+K13296+K07830+K08768+K07188+K08341+K08047
Environmental Information Processing	Signal transduction	cAMP signaling pathway	10	0.129004	0.949359	ko04024	gene24535;gene10464;gene18724;gene4070;gene18729;gene1648;gene5235;gene22711;gene19908;gene22078	K15494+K05197+K13296+K04260+K07830+K04351+K04587+K07188+K04265+K08047
Metabolism	Amino acid metabolism	Tryptophan metabolism	3	0.13314	0.949359	ko00380	gene2064;gene14543;gene1920	K00157+K07410+K03392
Environmental Information Processing	Signal transduction	Hippo signaling pathway -fly	4	0.135597	0.949359	ko04391	gene8658;gene600;gene20931;gene20930	K04354+K10149+K16507+K16507
Organismal Systems	Circulatory system	Adrenergic signaling in cardiomyocytes	7	0.13717	0.949359	ko04261	gene8658;gene26971;gene11493;gene1648;gene13447;gene27250;gene22078	K04354+K04838+K04135+K04351+K12314+K04860+K08047
Human Diseases	Infectious diseases	Amoebiasis	5	0.149328	0.992795	ko05146	gene14008;gene1261;gene31143;gene9670;gene25616	K01476+K06464+K02187+K04637+K04000
Human Diseases	Cardiovascular diseases	Viral myocarditis	3	0.153915	0.992795	ko05416	gene1261;gene31143;gene162	K06464+K02187+K06788
Human Diseases	Infectious diseases	Tuberculosis	7	0.174397	0.992795	ko05152	gene30014;gene17264;gene1261;gene31143;gene2903;gene7278;gene3408	K06462+K05399+K06464+K02187+K12560+K10074+K06498
Human Diseases	Cancers	Central carbon metabolism in cancer	4	0.174743	0.992795	ko05230	gene22878;gene4439;gene32039;gene7154	K05616+K07299+K00016+K00016
Metabolism	Carbohydrate metabolism	Butanoate metabolism	2	0.178411	0.992795	ko00650	gene29811;gene29812	K01896+K01896
Organismal Systems	Immune system	RIG-I-like receptor signaling pathway	3	0.183048	0.992795	ko04622	gene22083;gene8538;gene10234	K08601+K12671+K12654
Organismal Systems	Immune system	IL-17 signaling pathway	4	0.18658	0.992795	ko04657	gene27071;gene8538;gene31143;gene27962	K05168+K12671+K02187+K04079
Cellular Processes	Cellular community - eukaryotes	Signaling pathways regulating pluripotency of stem cells	6	0.195351	0.992795	ko04550	gene27247;gene15883;gene1793;gene14134;gene35104;gene15236	K00444+K16791+K13568+K08553+K18487+K17693
Organismal Systems	Digestive system	Bile secretion	5	0.203927	0.992795	ko04976	gene32518;gene24386;gene4439;gene22078;gene20143	K08205+K05667+K07299+K08047+K01253
Metabolism	Global and overview maps	Fatty acid metabolism	3	0.205783	0.992795	ko01212	gene8601;gene473;gene7957	K00507+K10703+K10203
Metabolism	Lipid metabolism	Fatty acid elongation	2	0.210868	0.992795	ko00062	gene473;gene7957	K10703+K10203
Metabolism	Metabolism of cofactors and vitamins	Nicotinate and nicotinamide metabolism	2	0.210868	0.992795	ko00760	gene2064;gene30716	K00157+K01081
Environmental Information Processing	Signal transduction	Hippo signaling pathway - multiple species	2	0.210868	0.992795	ko04392	gene20931;gene20930	K16507+K16507
Human Diseases	Substance dependence	Morphine addiction	4	0.210989	0.992795	ko05032	gene18724;gene17901;gene19908;gene22078	K13296+K18436+K04265+K08047
Metabolism	Metabolism of cofactors and vitamins	Vitamin B6 metabolism	1	0.213446	0.992795	ko00750	gene2064	K00157
Metabolism	Energy metabolism	Sulfur metabolism	1	0.213446	0.992795	ko00920	gene6709	K00387
Organismal Systems	Aging	Longevity regulating pathway - multiple species	3	0.213502	0.992795	ko04213	gene13971;gene22078;gene18511	K03283+K08047+K09542
Human Diseases	Neurodegenerative diseases	Amyotrophic lateral sclerosis (ALS)	3	0.213502	0.992795	ko05014	gene10464;gene31143;gene10443	K05197+K02187+K00432
Cellular Processes	Cell growth and death	p53 signaling pathway	4	0.217229	0.992795	ko04115	gene1816;gene31143;gene17654;gene12525	K10128+K02187+K04596+K10136
Organismal Systems	Immune system	Platelet activation	5	0.225265	0.992795	ko04611	gene20927;gene13473;gene15267;gene22078;gene29138	K03903+K04350+K00509+K08047+K12757
Organismal Systems	Endocrine system	Estrogen signaling pathway	5	0.230702	0.992795	ko04915	gene10251;gene27962;gene13971;gene22078;gene24634	K08523+K04079+K03283+K08047+K07604
Human Diseases	Drug resistance	Platinum drug resistance	4	0.23624	0.992795	ko01524	gene7191;gene3721;gene3724;gene31143	K00799+K00799+K00799+K02187
Organismal Systems	Circulatory system	Vascular smooth muscle contraction	5	0.252816	0.992795	ko04270	gene2731;gene11493;gene24225;gene22078;gene6700	K01047+K04135+K10352+K08047+K12751
Metabolism	Carbohydrate metabolism	Propanoate metabolism	2	0.254897	0.992795	ko00640	gene32039;gene7154	K00016+K00016
Environmental Information Processing	Signal transduction	Hippo signaling pathway	6	0.267754	0.992795	ko04390	gene8658;gene27247;gene1261;gene32035;gene15236;gene4498	K04354+K00444+K06464+K12075+K17693+K16622
Metabolism	Carbohydrate metabolism	Glyoxylate and dicarboxylate metabolism	2	0.277019	0.992795	ko00630	gene30603;gene3571	K18123+K11517
Organismal Systems	Endocrine system	Renin secretion	3	0.27706	0.992795	ko04924	gene18724;gene5235;gene19908	K13296+K04587+K04265
Genetic Information Processing	Replication and repair	DNA replication	2	0.28807	0.992795	ko03030	gene1908;gene33435	K02542+K10741
Organismal Systems	Endocrine system	Parathyroid hormone synthesis, secretion and action	4	0.295281	0.992795	ko04928	gene10251;gene27974;gene9870;gene22078	K08523+K09278+K14683+K08047
Organismal Systems	Environmental adaptation	Circadian entrainment	4	0.301973	0.992795	ko04713	gene13437;gene10464;gene5235;gene22078	K04963+K05197+K04587+K08047
Human Diseases	Infectious diseases	Salmonella infection	4	0.301973	0.992795	ko05132	gene17264;gene979;gene24225;gene4863	K05399+K05759+K10352+K10415
Metabolism	Lipid metabolism	Primary bile acid biosynthesis	1	0.302495	0.992795	ko00120	gene25660	K01796
Organismal Systems	Immune system	Fc gamma R-mediated phagocytosis	4	0.315407	0.992795	ko04666	gene25300;gene20826;gene2903;gene3408	K12367+K06478+K12560+K06498
Cellular Processes	Cellular community - eukaryotes	Tight junction	6	0.319319	0.992795	ko04530	gene8658;gene5917;gene24225;gene32035;gene6700;gene29138	K04354+K18584+K10352+K12075+K12751+K12757
Organismal Systems	Digestive system	Gastric acid secretion	3	0.334034	0.992795	ko04971	gene32315;gene1329;gene22078	K04995+K05008+K08047
Human Diseases	Infectious diseases	Legionellosis	3	0.342189	0.992795	ko05134	gene1261;gene31143;gene13971	K06464+K02187+K03283
Environmental Information Processing	Signal transduction	Jak-STAT signaling pathway	5	0.345315	0.992795	ko04630	gene2064;gene5495;gene2644;gene4105;gene33141	K00157+K05424+K05140+K05062+K14365
Metabolism	Lipid metabolism	Ether lipid metabolism	2	0.353706	0.992795	ko00565	gene2731;gene2609	K01047+K01062
Organismal Systems	Digestive system	Protein digestion and absorption	3	0.358474	0.992795	ko04974	gene17682;gene22878;gene33025	K16630+K05616+K14208
Metabolism	Lipid metabolism	Arachidonic acid metabolism	3	0.366597	0.992795	ko00590	gene2731;gene15267;gene10443	K01047+K00509+K00432
Metabolism	Lipid metabolism	Steroid biosynthesis	1	0.381506	0.992795	ko00100	gene18723	K07419
Human Diseases	Infectious diseases	African trypanosomiasis	2	0.385775	0.992795	ko05143	gene7010;gene7030	K14480+K14480
Organismal Systems	Digestive system	Pancreatic secretion	3	0.390854	0.992795	ko04972	gene2731;gene22078;gene1035	K01047+K08047+K04964
Cellular Processes	Transport and catabolism	Phagosome	5	0.392626	0.992795	ko04145	gene1261;gene4863;gene2903;gene7278;gene3408	K06464+K10415+K12560+K10074+K06498
Organismal Systems	Endocrine system	Oxytocin signaling pathway	5	0.392626	0.992795	ko04921	gene13437;gene14;gene27250;gene22078;gene6700	K04963+K17901+K04860+K08047+K12751
Metabolism	Metabolism of cofactors and vitamins	Retinol metabolism	2	0.396314	0.992795	ko00830	gene2064;gene6658	K00157+K11154
Organismal Systems	Excretory system	Vasopressin-regulated water reabsorption	2	0.396314	0.992795	ko04962	gene4863;gene6308	K10415+K09865
Metabolism	Lipid metabolism	Sphingolipid metabolism	2	0.40677	0.992795	ko00600	gene19277;gene1710	K12357+K04710
Organismal Systems	Digestive system	Salivary secretion	3	0.414878	0.992795	ko04970	gene13437;gene11493;gene22078	K04963+K04135+K08047
Metabolism	Amino acid metabolism	Arginine biosynthesis	1	0.417604	0.992795	ko00220	gene14008	K01476
Organismal Systems	Endocrine system	Renin-angiotensin system	1	0.417604	0.992795	ko04614	gene26087	K11140
Organismal Systems	Endocrine system	Insulin signaling pathway	5	0.422112	0.992795	ko04910	gene18724;gene11586;gene22711;gene24705;gene17043	K13296+K03841+K07188+K01084+K01596
Metabolism	Metabolism of cofactors and vitamins	One carbon pool by folate	1	0.434859	0.992795	ko00670	gene6964	K00289
Metabolism	Global and overview maps	2-Oxocarboxylic acid metabolism	1	0.434859	0.992795	ko01210	gene7137	K00826
Organismal Systems	Immune system	Hematopoietic cell lineage	3	0.438598	0.992795	ko04640	gene20005;gene26087;gene3408	K04012+K11140+K06498
Metabolism	Metabolism of cofactors and vitamins	Pantothenate and CoA biosynthesis	1	0.451605	0.992795	ko00770	gene7137	K00826
Metabolism	Global and overview maps	Biosynthesis of amino acids	3	0.45421	0.992795	ko01230	gene14008;gene7137;gene21426	K01476+K00826+K17989
Environmental Information Processing	Signaling molecules and interaction	Cell adhesion molecules (CAMs)	4	0.456445	0.992795	ko04514	gene306;gene1261;gene20826;gene5126	K06547+K06464+K06478+K06756
Metabolism	Amino acid metabolism	Valine, leucine and isoleucine degradation	2	0.457663	0.992795	ko00280	gene2064;gene7137	K00157+K00826
Metabolism	Carbohydrate metabolism	Amino sugar and nucleotide sugar metabolism	2	0.457663	0.992795	ko00520	gene20862;gene8273	K00326+K02564
Cellular Processes	Transport and catabolism	Peroxisome	3	0.46195	0.992795	ko04146	gene21524;gene3571;gene25660	K00273+K11517+K01796
Metabolism	Carbohydrate metabolism	Pentose and glucuronate interconversions	1	0.467858	0.992795	ko00040	gene26968	K00854
Organismal Systems	Excretory system	Proximal tubule bicarbonate reclamation	1	0.467858	0.992795	ko04964	gene17043	K01596
Human Diseases	Cancers	Prostate cancer	4	0.46952	0.992795	ko05215	gene7191;gene3721;gene3724;gene27962	K00799+K00799+K00799+K04079
Environmental Information Processing	Signaling molecules and interaction	Neuroactive ligand-receptor interaction	7	0.476056	0.992795	ko04080	gene10464;gene5495;gene11493;gene4070;gene4105;gene5235;gene19908	K05197+K05424+K04135+K04260+K05062+K04587+K04265
Metabolism	Amino acid metabolism	Glycine, serine and threonine metabolism	2	0.477311	0.992795	ko00260	gene21524;gene21426	K00273+K17989
Human Diseases	Infectious diseases	Leishmaniasis	2	0.477311	0.992795	ko05140	gene1261;gene3408	K06464+K06498
Metabolism	Glycan biosynthesis and metabolism	Other glycan degradation	1	0.48363	0.992795	ko00511	gene19277	K12357
Metabolism	Lipid metabolism	alpha-Linolenic acid metabolism	1	0.48363	0.992795	ko00592	gene2731	K01047
Organismal Systems	Immune system	Toll-like receptor signaling pathway	3	0.484878	0.992795	ko04620	gene17264;gene8538;gene31163	K05399+K12671+K05401
Organismal Systems	Immune system	Th17 cell differentiation	3	0.484878	0.992795	ko04659	gene591;gene27962;gene28874	K04723+K04079+K09445
Metabolism	Lipid metabolism	Glycerolipid metabolism	2	0.486972	0.992795	ko00561	gene8623;gene34166	K13506+K00864
Cellular Processes	Transport and catabolism	Autophagy - animal	4	0.495317	0.992795	ko04140	gene18729;gene21056;gene7292;gene501	K07830+K07920+K08341+K19330
Metabolism	Glycan biosynthesis and metabolism	Glycosaminoglycan biosynthesis - heparan sulfate / heparin	1	0.498938	0.992795	ko00534	gene12163	K08104
Genetic Information Processing	Replication and repair	Mismatch repair	1	0.498938	0.992795	ko03430	gene33435	K10741
Organismal Systems	Endocrine system	Progesterone-mediated oocyte maturation	3	0.499903	0.992795	ko04914	gene18724;gene27962;gene22078	K13296+K04079+K08047
Environmental Information Processing	Signal transduction	FoxO signaling pathway	4	0.501685	0.992795	ko04068	gene10937;gene7292;gene24705;gene17043	K04685+K08341+K01084+K01596
Cellular Processes	Cell growth and death	Apoptosis - fly	2	0.50596	0.992795	ko04214	gene600;gene26787	K10149+K03262
Metabolism	Nucleotide metabolism	Pyrimidine metabolism	3	0.507333	0.992795	ko00240	gene2718;gene30716;gene28230	K01489+K01081+K03000
Organismal Systems	Development	Osteoclast differentiation	4	0.508019	0.992795	ko04380	gene22083;gene2903;gene3408;gene18042	K08601+K12560+K06498+K05148
Metabolism	Lipid metabolism	Glycerophospholipid metabolism	3	0.514706	0.992795	ko00564	gene2731;gene8627;gene8623	K01047+K00981+K13506
Human Diseases	Cardiovascular diseases	Dilated cardiomyopathy (DCM)	3	0.514706	0.992795	ko05414	gene13447;gene27250;gene22078	K12314+K04860+K08047
Cellular Processes	Transport and catabolism	Mitophagy - animal	2	0.515281	0.992795	ko04137	gene18729;gene7292	K07830+K08341
Cellular Processes	Cell growth and death	Ferroptosis	2	0.515281	0.992795	ko04216	gene27690;gene22960	K11204+K13625
Organismal Systems	Nervous system	Dopaminergic synapse	4	0.520578	0.992795	ko04728	gene8658;gene24535;gene10464;gene1848	K04354+K15494+K05197+K10396
Organismal Systems	Circulatory system	Cardiac muscle contraction	3	0.52202	0.992795	ko04260	gene13447;gene17903;gene27250	K12314+K00411+K04860
Environmental Information Processing	Signal transduction	MAPK signaling pathway	8	0.522882	0.992795	ko04010	gene591;gene13473;gene18729;gene31143;gene13971;gene27250;gene16000;gene22583	K04723+K04350+K07830+K02187+K03283+K04860+K04358+K12363
Organismal Systems	Immune system	Antigen processing and presentation	2	0.524487	0.992795	ko04612	gene27962;gene13971	K04079+K03283
Human Diseases	Cancers	Basal cell carcinoma	2	0.533575	0.992795	ko05217	gene27247;gene4364	K00444+K11101
Organismal Systems	Digestive system	Vitamin digestion and absorption	1	0.542203	0.992795	ko04977	gene16606	K14616
Metabolism	Global and overview maps	Carbon metabolism	4	0.545236	0.992795	ko01200	gene32018;gene11586;gene3571;gene21426	K00029+K03841+K11517+K17989
Organismal Systems	Endocrine system	Thyroid hormone synthesis	2	0.551394	0.992795	ko04918	gene10443;gene22078	K00432+K08047
Metabolism	Carbohydrate metabolism	Galactose metabolism	1	0.555782	0.992795	ko00052	gene24705	K01084
Genetic Information Processing	Transcription	RNA polymerase	1	0.555782	0.992795	ko03020	gene28230	K03000
Human Diseases	Infectious diseases	Chagas disease (American trypanosomiasis)	3	0.55767	0.992795	ko05142	gene8658;gene2682;gene9670	K04354+K03986+K04637
Organismal Systems	Immune system	C-type lectin receptor signaling pathway	3	0.564608	0.992795	ko04625	gene22083;gene18729;gene7278	K08601+K07830+K10074
Human Diseases	Endocrine and metabolic diseases	Non-alcoholic fatty liver disease (NAFLD)	5	0.568514	0.992795	ko04932	gene5495;gene4105;gene31143;gene17903;gene622	K05424+K05062+K02187+K00411+K07296
Organismal Systems	Endocrine system	Ovarian Steroidogenesis	2	0.568731	0.992795	ko04913	gene14543;gene22078	K07410+K08047
Cellular Processes	Cell growth and death	Necroptosis	5	0.573784	0.992795	ko04217	gene11099;gene22083;gene27962;gene22960;gene31163	K12967+K08601+K04079+K13625+K05401
Organismal Systems	Digestive system	Mineral absorption	2	0.577217	0.992795	ko04978	gene22960;gene9870	K13625+K14683
Metabolism	Lipid metabolism	Linoleic acid metabolism	1	0.58175	0.992795	ko00591	gene2731	K01047
Environmental Information Processing	Signal transduction	Hedgehog signaling pathway - fly	1	0.58175	0.992795	ko04341	gene1953	K09319
Human Diseases	Endocrine and metabolic diseases	Insulin resistance	3	0.585022	0.992795	ko04931	gene4439;gene24705;gene17043	K07299+K01084+K01596
Environmental Information Processing	Signal transduction	Calcium signaling pathway	5	0.589392	0.992795	ko04020	gene13437;gene11493;gene4070;gene9670;gene22078	K04963+K04135+K04260+K04637+K08047
Human Diseases	Substance dependence	Amphetamine addiction	2	0.593823	0.992795	ko05031	gene24535;gene10464	K15494+K05197
Organismal Systems	Nervous system	Serotonergic synapse	3	0.598291	0.992795	ko04726	gene31143;gene15267;gene1035	K02187+K00509+K04964
Metabolism	Carbohydrate metabolism	Fructose and mannose metabolism	1	0.606206	0.992795	ko00051	gene11586	K03841
Organismal Systems	Excretory system	Aldosterone-regulated sodium reabsorption	1	0.606206	0.992795	ko04960	gene32315	K04995
Human Diseases	Cardiovascular diseases	Arrhythmogenic right ventricular cardiomyopathy (ARVC)	2	0.60994	0.992795	ko05412	gene27250;gene7069	K04860+K12642
Organismal Systems	Immune system	Leukocyte transendothelial migration	3	0.611282	0.992795	ko04670	gene1261;gene1648;gene29138	K06464+K04351+K12757
Metabolism	Carbohydrate metabolism	Starch and sucrose metabolism	1	0.617895	0.992795	ko00500	gene24705	K01084
Cellular Processes	Transport and catabolism	Autophagy - other eukaryotes	1	0.617895	0.992795	ko04136	gene7292	K08341
Human Diseases	Cardiovascular diseases	Fluid shear stress and atherosclerosis	4	0.626027	0.992795	ko05418	gene7191;gene3721;gene3724;gene27962	K00799+K00799+K00799+K04079
Human Diseases	Cancers	Pathways in cancer	14	0.639225	0.992795	ko05200	gene7191;gene27247;gene13473;gene3721;gene3724;gene4070;gene31143;gene27962;gene10937;gene4439;gene16000;gene22078;gene4364;gene22583	K00799+K00444+K04350+K00799+K00799+K04260+K02187+K04079+K04685+K07299+K04358+K08047+K11101+K12363
Metabolism	Carbohydrate metabolism	Citrate cycle (TCA cycle)	1	0.640247	0.992795	ko00020	gene17043	K01596
Metabolism	Carbohydrate metabolism	Pentose phosphate pathway	1	0.640247	0.992795	ko00030	gene11586	K03841
Metabolism	Amino acid metabolism	Tyrosine metabolism	1	0.640247	0.992795	ko00350	gene2064	K00157
Metabolism	Metabolism of other amino acids	beta-Alanine metabolism	1	0.640247	0.992795	ko00410	gene34234	K00802
Human Diseases	Infectious diseases	Shigellosis	2	0.640709	0.992795	ko05131	gene979;gene10312	K05759+K05740
Organismal Systems	Nervous system	Glutamatergic synapse	3	0.64252	0.992795	ko04724	gene10464;gene22078;gene1035	K05197+K08047+K04964
Human Diseases	Infectious diseases	Epithelial cell signaling in Helicobacter pylori infection	2	0.648098	0.992795	ko05120	gene10251;gene31143	K08523+K02187
Human Diseases	Substance dependence	Nicotine addiction	1	0.65093	0.992795	ko05033	gene10464	K05197
Human Diseases	Infectious diseases	Influenza A	4	0.652591	0.992795	ko05164	gene11099;gene8538;gene13971;gene31163	K12967+K12671+K03283+K05401
Environmental Information Processing	Signal transduction	Sphingolipid signaling pathway	3	0.660402	0.992795	ko04071	gene8658;gene1710;gene19908	K04354+K04710+K04265
Cellular Processes	Cell growth and death	Apoptosis - multiple species	1	0.661297	0.992795	ko04215	gene31143	K02187
Organismal Systems	Digestive system	Fat digestion and absorption	1	0.661297	0.992795	ko04975	gene2731	K01047
Human Diseases	Immune diseases	Primary immunodeficiency	1	0.661297	0.992795	ko05340	gene20826	K06478
Genetic Information Processing	Replication and repair	Homologous recombination	1	0.671358	0.992795	ko03440	gene33435	K10741
Environmental Information Processing	Signal transduction	Hedgehog signaling pathway	1	0.671358	0.992795	ko04340	gene4364	K11101
Environmental Information Processing	Signal transduction	MAPK signaling pathway - fly	2	0.676457	0.992795	ko04013	gene979;gene22083	K05759+K08601
Environmental Information Processing	Signal transduction	cGMP - PKG signaling pathway	4	0.677879	0.992795	ko04022	gene18724;gene11493;gene19908;gene22078	K13296+K04135+K04265+K08047
Environmental Information Processing	Signal transduction	HIF-1 signaling pathway	3	0.683233	0.992795	ko04066	gene4439;gene32039;gene7154	K07299+K00016+K00016
Environmental Information Processing	Signal transduction	Rap1 signaling pathway	5	0.697908	0.992795	ko04015	gene979;gene1261;gene1648;gene16000;gene22078	K05759+K06464+K04351+K04358+K08047
Organismal Systems	Aging	Longevity regulating pathway - mammal	2	0.702939	0.992795	ko04211	gene22078;gene622	K08047+K07296
Organismal Systems	Immune system	B cell receptor signaling pathway	2	0.702939	0.992795	ko04662	gene20005;gene2903	K04012+K12560
Cellular Processes	Transport and catabolism	Endocytosis	6	0.707992	0.992795	ko04144	gene1968;gene29426;gene11044;gene13971;gene8194;gene1848	K12183+K12485+K11247+K03283+K18440+K10396
Organismal Systems	Digestive system	Carbohydrate digestion and absorption	1	0.708714	0.992795	ko04973	gene24705	K01084
Human Diseases	Cancers	Bladder cancer	1	0.708714	0.992795	ko05219	gene10251	K08523
Human Diseases	Cancers	MicroRNAs in cancer	4	0.720123	0.992795	ko05206	gene14543;gene31143;gene600;gene32345	K07410+K02187+K10149+K08670
Organismal Systems	Nervous system	GABAergic synapse	2	0.721603	0.992795	ko04727	gene7292;gene22078	K08341+K08047
Human Diseases	Endocrine and metabolic diseases	Type II diabetes mellitus	1	0.725775	0.992795	ko04930	gene622	K07296
Human Diseases	Infectious diseases	Malaria	1	0.725775	0.992795	ko05144	gene1261	K06464
Environmental Information Processing	Membrane transport	ABC transporters	2	0.727602	0.992795	ko02010	gene25236;gene24386	K05652+K05667
Organismal Systems	Endocrine system	GnRH signaling pathway	2	0.727602	0.992795	ko04912	gene10251;gene22078	K08523+K08047
Human Diseases	Cancers	Hepatocellular carcinoma	4	0.728938	0.992795	ko05225	gene7191;gene27247;gene3721;gene3724	K00799+K00444+K00799+K00799
Human Diseases	Infectious diseases	Kaposi sarcoma-associated herpesvirus infection	4	0.733267	0.992795	ko05167	gene14;gene31143;gene7292;gene31163	K17901+K02187+K08341+K05401
Human Diseases	Infectious diseases	HTLV-I infection	6	0.734043	0.992795	ko05166	gene27247;gene1261;gene18729;gene10937;gene4439;gene22078	K00444+K06464+K07830+K04685+K07299+K08047
Organismal Systems	Immune system	NOD-like receptor signaling pathway	3	0.740101	0.992795	ko04621	gene10234;gene27962;gene7292	K12654+K04079+K08341
Human Diseases	Drug resistance	Endocrine resistance	2	0.744948	0.992795	ko01522	gene10251;gene22078	K08523+K08047
Human Diseases	Cardiovascular diseases	Hypertrophic cardiomyopathy (HCM)	2	0.744948	0.992795	ko05410	gene13447;gene27250	K12314+K04860
Human Diseases	Endocrine and metabolic diseases	AGE-RAGE signaling pathway in diabetic complications	2	0.750518	0.992795	ko04933	gene31143;gene10312	K02187+K05740
Genetic Information Processing	Replication and repair	Nucleotide excision repair	1	0.756971	0.992795	ko03420	gene33435	K10741
Human Diseases	Cancers	Gastric cancer	3	0.758679	0.992795	ko05226	gene27247;gene10937;gene16000	K00444+K04685+K04358
Human Diseases	Substance dependence	Cocaine addiction	1	0.764202	0.992795	ko05030	gene24535	K15494
Environmental Information Processing	Signal transduction	Phosphatidylinositol signaling system	2	0.771763	0.992795	ko04070	gene29193;gene8627	K01092+K00981
Organismal Systems	Immune system	T cell receptor signaling pathway	2	0.771763	0.992795	ko04660	gene13473;gene20826	K04350+K06478
Organismal Systems	Endocrine system	Melanogenesis	2	0.771763	0.992795	ko04916	gene27247;gene22078	K00444+K08047
Organismal Systems	Endocrine system	Aldosterone synthesis and secretion	2	0.771763	0.992795	ko04925	gene22711;gene22078	K07188+K08047
Environmental Information Processing	Signal transduction	Phospholipase D signaling pathway	3	0.771902	0.992795	ko04072	gene18729;gene1648;gene22078	K07830+K04351+K08047
Environmental Information Processing	Signal transduction	Ras signaling pathway	5	0.778366	0.992795	ko04014	gene2731;gene13473;gene18729;gene16000;gene22583	K01047+K04350+K07830+K04358+K12363
Organismal Systems	Sensory system	Inflammatory mediator regulation of TRP channels	2	0.781786	0.992795	ko04750	gene591;gene22078	K04723+K08047
Human Diseases	Cancers	Small cell lung cancer	2	0.786651	0.992795	ko05222	gene31143;gene10937	K02187+K04685
Human Diseases	Infectious diseases	Toxoplasmosis	2	0.796098	0.992795	ko05145	gene31143;gene13971	K02187+K03283
Genetic Information Processing	Replication and repair	Fanconi anemia pathway	1	0.803303	0.992795	ko03460	gene33435	K10741
Environmental Information Processing	Signal transduction	VEGF signaling pathway	1	0.809161	0.992795	ko04370	gene3106	K08273
Organismal Systems	Nervous system	Long-term depression	1	0.809161	0.992795	ko04730	gene10464	K05197
Metabolism	Lipid metabolism	Steroid hormone biosynthesis	1	0.814845	0.992795	ko00140	gene14543	K07410
Human Diseases	Endocrine and metabolic diseases	Cushing syndrome	3	0.829402	0.992795	ko04934	gene27247;gene10937;gene22078	K00444+K04685+K08047
Organismal Systems	Endocrine system	Thyroid hormone signaling pathway	2	0.834186	0.992795	ko04919	gene14;gene4439	K17901+K07299
Organismal Systems	Nervous system	Synaptic vesicle cycle	1	0.840836	0.992795	ko04721	gene6016	K15290
Human Diseases	Infectious diseases	Hepatitis C	2	0.845387	0.992795	ko05160	gene8658;gene31163	K04354+K05401
Organismal Systems	Endocrine system	Cortisol synthesis and secretion	1	0.845581	0.992795	ko04927	gene22078	K08047
Environmental Information Processing	Signal transduction	TNF signaling pathway	2	0.848965	0.992795	ko04668	gene8538;gene31143	K12671+K02187
Human Diseases	Drug resistance	Antifolate resistance	1	0.850186	0.992795	ko01523	gene24386	K05667
Human Diseases	Cancers	Acute myeloid leukemia	1	0.854653	0.992795	ko05221	gene3408	K06498
Human Diseases	Cancers	Proteoglycans in cancer	4	0.85658	0.992795	ko05205	gene27247;gene10251;gene18729;gene31143	K00444+K08523+K07830+K02187
Human Diseases	Infectious diseases	Measles	2	0.862542	0.992795	ko05162	gene13971;gene2903	K03283+K12560
Human Diseases	Cancers	Melanoma	1	0.863194	0.992795	ko05218	gene16000	K04358
Organismal Systems	Environmental adaptation	Thermogenesis	5	0.863527	0.992795	ko04714	gene17903;gene26081;gene22711;gene22078;gene4498	K00411+K08768+K07188+K08047+K16622
Human Diseases	Infectious diseases	Human cytomegalovirus infection	4	0.864251	0.992795	ko05163	gene4070;gene10234;gene31143;gene22078	K04260+K12654+K02187+K08047
Organismal Systems	Endocrine system	Relaxin signaling pathway	2	0.865758	0.992795	ko04926	gene9670;gene22078	K04637+K08047
Human Diseases	Infectious diseases	Herpes simplex infection	3	0.86606	0.992795	ko05168	gene31143;gene11881;gene31163	K02187+K03994+K05401
Metabolism	Carbohydrate metabolism	Inositol phosphate metabolism	1	0.867276	0.992795	ko00562	gene29193	K01092
Organismal Systems	Immune system	Chemokine signaling pathway	3	0.87145	0.992795	ko04062	gene8538;gene25300;gene22078	K12671+K12367+K08047
Human Diseases	Neurodegenerative diseases	Parkinson disease	3	0.874073	0.992795	ko05012	gene31143;gene17903;gene8249	K02187+K00411+K05611
Organismal Systems	Nervous system	Long-term potentiation	1	0.875078	0.992795	ko04720	gene10464	K05197
Human Diseases	Cancers	Renal cell carcinoma	1	0.885935	0.992795	ko05211	gene4439	K07299
Human Diseases	Cancers	Transcriptional misregulation in cancers	3	0.895632	0.992795	ko05202	gene3408;gene27974;gene15236	K06498+K09278+K17693
Environmental Information Processing	Signal transduction	ErbB signaling pathway	1	0.895852	0.992795	ko04012	gene10251	K08523
Organismal Systems	Immune system	Natural killer cell mediated cytotoxicity	2	0.896854	0.992795	ko04650	gene1261;gene31143	K06464+K02187
Human Diseases	Infectious diseases	Human papillomavirus infection	6	0.897439	0.992795	ko05165	gene8658;gene27247;gene31143;gene4949;gene32035;gene31163	K04354+K00444+K02187+K11409+K12075+K05401
Human Diseases	Cancers	Breast cancer	2	0.904096	0.992795	ko05224	gene27247;gene16000	K00444+K04358
Human Diseases	Neurodegenerative diseases	Huntington disease	4	0.905141	0.992795	ko05016	gene31143;gene10443;gene4970;gene17903	K02187+K00432+K10408+K00411
Genetic Information Processing	Folding, sorting and degradation	Protein processing in endoplasmic reticulum	3	0.90613	0.992795	ko04141	gene27962;gene13971;gene18511	K04079+K03283+K09542
Human Diseases	Infectious diseases	Hepatitis B	2	0.913018	0.992795	ko05161	gene31143;gene31163	K02187+K05401
Human Diseases	Immune diseases	Rheumatoid arthritis	1	0.913185	0.992795	ko05323	gene1261	K06464
Organismal Systems	Development	Axon guidance	3	0.913833	0.992795	ko04360	gene27247;gene20141;gene1035	K00444+K05746+K04964
Environmental Information Processing	Signal transduction	Wnt signaling pathway	2	0.915125	0.992795	ko04310	gene27247;gene30611	K00444+K02222
Human Diseases	Drug resistance	EGFR tyrosine kinase inhibitor resistance	1	0.915781	0.992795	ko01521	gene22690	K05115
Cellular Processes	Cell growth and death	Cell cycle	2	0.917183	0.992795	ko04110	gene1908;gene10937	K02542+K04685
Environmental Information Processing	Signal transduction	mTOR signaling pathway	2	0.928585	0.992795	ko04150	gene27247;gene2376	K00444+K08272
Organismal Systems	Nervous system	Retrograde endocannabinoid signaling	2	0.930335	0.992795	ko04723	gene10464;gene22078	K05197+K08047
Cellular Processes	Cellular community - eukaryotes	Gap junction	1	0.931911	0.992795	ko04540	gene22078	K08047
Human Diseases	Infectious diseases	Pathogenic Escherichia coli infection	1	0.931911	0.992795	ko05130	gene24634	K07604
Human Diseases	Cancers	Colorectal cancer	1	0.933949	0.992795	ko05210	gene31143	K02187
Organismal Systems	Sensory system	Olfactory transduction	2	0.935348	0.992795	ko04740	gene19153;gene19151	K04257+K04257
Human Diseases	Neurodegenerative diseases	Alzheimer disease	3	0.939242	0.992795	ko05010	gene13437;gene31143;gene17903	K04963+K02187+K00411
Human Diseases	Cancers	Viral carcinogenesis	3	0.940575	0.992795	ko05203	gene31143;gene10937;gene4949	K02187+K04685+K11409
Cellular Processes	Cell growth and death	Cellular senescence	2	0.942954	0.992795	ko04218	gene18729;gene10937	K07830+K04685
Genetic Information Processing	Translation	mRNA surveillance pathway	1	0.946613	0.992795	ko03015	gene8658	K04354
Organismal Systems	Nervous system	Cholinergic synapse	1	0.948213	0.992795	ko04725	gene22078	K08047
Human Diseases	Cancers	Choline metabolism in cancer	1	0.948213	0.992795	ko05231	gene12716	K08199
Metabolism	Energy metabolism	Oxidative phosphorylation	2	0.950963	0.992795	ko00190	gene8001;gene17903	K01507+K00411
Environmental Information Processing	Signal transduction	NF-kappa B signaling pathway	1	0.951271	0.992795	ko04064	gene17264	K05399
Environmental Information Processing	Signal transduction	PI3K-Akt signaling pathway	5	0.959319	0.995761	ko04151	gene8658;gene27962;gene16000;gene24705;gene17043	K04354+K04079+K04358+K01084+K01596
Cellular Processes	Cell growth and death	Oocyte meiosis	1	0.975083	0.995761	ko04114	gene22078	K08047
Human Diseases	Substance dependence	Alcoholism	2	0.975509	0.995761	ko05034	gene24535;gene4949	K15494+K11409
Human Diseases	Infectious diseases	Epstein-Barr virus infection	2	0.97794	0.995761	ko05169	gene20005;gene13971	K04012+K03283
Cellular Processes	Transport and catabolism	Lysosome	1	0.977948	0.995761	ko04142	gene6918	K08239
Cellular Processes	Cellular community - eukaryotes	Focal adhesion	2	0.978511	0.995761	ko04510	gene10312;gene29138	K05740+K12757
Genetic Information Processing	Translation	RNA transport	2	0.982589	0.995761	ko03013	gene10510;gene26787	K05749+K03262
Cellular Processes	Cell growth and death	Apoptosis	1	0.985183	0.995761	ko04210	gene31143	K02187
Genetic Information Processing	Folding, sorting and degradation	Ubiquitin mediated proteolysis	1	0.990926	0.995761	ko04120	gene25796	K10582
Genetic Information Processing	Transcription	Spliceosome	1	0.991975	0.995761	ko03040	gene13971	K03283
Genetic Information Processing	Translation	Ribosome	3	0.998856	0.998856	ko03010	gene196;gene26;gene31381	K02932+K02990+K02870
Legend
KEGG_A_class	Name of KEGG class a annotation pathway
KEGG_B_class	Name of KEGG class b annotation pathway
Pathway	Pathway name
num	Number of genes enriched in the pathway
Pvalue（P）	Statistical p-value obtained according to significance test method
Qvalue	Corrected p-Value
Pathway ID	Pathway ID account
Genes	Name of genes enriched in the pathway
K_IDs	KEGG ID of genes enriched in the pathway
