# Supplementary material for: Genome-Wide Identification and Characterization of Long Non-Coding RNAs in Longissimus dorsi Skeletal Muscle of Shandong Black Cattle and Luxi Cattle
Source: Front Genet. 2022 May 16;13:849399. doi: 10.3389/fgene.2022.849399 (PMC9149217; doi:10.3389/fgene.2022.849399)
Supplement: Supplementary file 8 [file Table7.XLSX]

## Sheet: tree1
	gene10081	gene10186	gene10234	gene10251	gene10312	gene10330	gene1034	gene1035	gene10365	gene10367	gene10443	gene10464	gene10495	gene10506	gene10510	gene10599	gene10613	gene10677	gene10774	gene10937	gene10939	gene11038	gene11044	gene11063	gene11099	gene11128	gene11151	gene11170	gene11275	gene11364	gene11468	gene11493	gene11586	gene11756	gene11845	gene11881	gene12054	gene12062	gene12094	gene12096	gene12103	gene12135	gene12163	gene12211	gene12219	gene12498	gene12525	gene12536	gene1261
gene10772	0.633128	0.764219	0.82022	0.979753	0.91469	0.903031	0.598589	0.778892	0.962024	0.894131	0.871547	0.979246	0.858337	0.717484	0.41121	0.975914	0.977131	0.442809	0.999261	0.731316	0.681465	0.624344	0.427216	0.145497	0.714498	0.93436	0.636326	0.868408	0.174089	0.785302	0.978253	0.403597	0.359395	0.351389	0.863086	-0.102734	0.860981	0.971098	0.528804	0.945044	0.972729	0.776983	0.953839	0.259441	0.792987	0.729655	0.891562	0.088246	0.730676
gene10776	0.825174	0.683228	0.929868	0.93783	0.91003	0.94616	0.731717	0.931654	0.943213	0.916644	0.787201	0.944942	0.919077	0.85682	0.549291	0.912846	0.94554	0.457875	0.945602	0.759672	0.788557	0.681806	0.529912	0.315732	0.90496	0.920295	0.814321	0.921504	0.292427	0.866799	0.95155	0.543618	0.384425	0.560415	0.846253	0.0295591	0.903042	0.94662	0.762451	0.944103	0.953894	0.751668	0.961117	0.349825	0.950107	0.861772	0.90249	0.222416	0.826456
gene10857	0.854281	0.792811	0.891667	0.85265	0.886075	0.91688	0.741106	0.86963	0.894164	0.931383	0.757594	0.849753	0.95374	0.944827	0.784591	0.846087	0.7911	0.701119	0.807137	0.895361	0.91439	0.865379	0.769155	0.644091	0.912885	0.907258	0.87878	0.980329	0.559544	0.947827	0.821624	0.752743	0.609741	0.820825	0.848741	0.354616	0.860755	0.878538	0.835054	0.929858	0.901248	0.832467	0.920399	0.624784	0.911447	0.97221	0.958706	0.548693	0.94486
gene11231	0.765552	0.864898	0.882357	0.995071	0.985424	0.975384	0.696762	0.805631	0.998896	0.945719	0.945043	0.994537	0.935409	0.84911	0.616187	0.98994	0.968417	0.640581	0.963016	0.877071	0.844035	0.795273	0.629457	0.359342	0.761699	0.958331	0.770334	0.930719	0.427931	0.909643	0.984423	0.626013	0.579907	0.52397	0.965736	0.158709	0.95991	0.999114	0.577759	0.971494	0.991044	0.90873	0.993169	0.502478	0.833339	0.848515	0.955707	0.33501	0.842052
gene11778	0.672038	0.680663	0.542847	0.389829	0.544064	0.578206	0.623957	0.411172	0.476404	0.5105	0.560593	0.395469	0.651147	0.729518	0.963565	0.404535	0.25739	0.943864	0.22651	0.817829	0.836237	0.902336	0.968552	0.885508	0.481432	0.43582	0.731622	0.59125	0.991359	0.761898	0.3258	0.964417	0.955866	0.835318	0.62973	0.943036	0.597624	0.441395	0.420024	0.505238	0.424942	0.737174	0.484696	0.96705	0.449491	0.755178	0.623464	0.986486	0.77172
gene12327	0.757346	0.939914	0.861957	0.951869	0.966253	0.961088	0.726391	0.753331	0.97396	0.925627	0.965527	0.952435	0.957679	0.864214	0.745717	0.962271	0.882189	0.79555	0.890602	0.950267	0.898458	0.901788	0.770724	0.493003	0.726757	0.930646	0.793381	0.93693	0.583437	0.94944	0.915187	0.739571	0.735151	0.615257	0.972343	0.343987	0.93852	0.965517	0.54084	0.970389	0.956782	0.961273	0.964055	0.643824	0.780912	0.888782	0.983199	0.510416	0.908876
gene12378	0.520088	0.479527	0.345717	0.126385	0.296871	0.346948	0.499326	0.226145	0.222103	0.270798	0.330121	0.135968	0.443411	0.549365	0.883881	0.143552	-0.0111412	0.845384	-0.0416325	0.633195	0.667986	0.755827	0.884063	0.86332	0.314216	0.184385	0.587236	0.369445	0.965903	0.569408	0.0605145	0.879067	0.878711	0.765875	0.396565	0.994323	0.36958	0.183726	0.295453	0.268318	0.167004	0.53053	0.2336	0.907744	0.255335	0.583293	0.399184	0.988172	0.607015
gene12542	0.871467	0.84596	0.817795	0.760564	0.866069	0.883414	0.768898	0.70018	0.81667	0.814607	0.834236	0.76433	0.888957	0.928371	0.929442	0.756084	0.680449	0.905545	0.63453	0.965396	0.983992	0.972153	0.929455	0.753385	0.721023	0.763839	0.892148	0.847759	0.864565	0.958952	0.728277	0.954378	0.897331	0.809025	0.910857	0.688722	0.906749	0.79593	0.592733	0.801613	0.776075	0.93541	0.823147	0.885342	0.743262	0.922144	0.868033	0.798655	0.909179
gene12583	0.699278	0.941102	0.837455	0.93461	0.933135	0.934463	0.719806	0.720866	0.95549	0.888788	0.966818	0.939185	0.944938	0.81034	0.725208	0.953961	0.85452	0.795785	0.88119	0.927842	0.856973	0.886884	0.760044	0.446221	0.683338	0.904519	0.752991	0.908297	0.557175	0.921718	0.890585	0.705122	0.731726	0.566777	0.942503	0.324631	0.898599	0.94777	0.476963	0.968304	0.937991	0.939588	0.93913	0.606332	0.736757	0.856377	0.973046	0.488429	0.900415
gene12916	0.695361	0.80452	0.856251	0.994316	0.949752	0.940918	0.647387	0.802476	0.984802	0.921116	0.905921	0.994557	0.897103	0.776508	0.493923	0.98895	0.984091	0.518828	0.994881	0.791751	0.750698	0.693942	0.507913	0.22685	0.744606	0.95054	0.698384	0.899674	0.272346	0.841092	0.990754	0.493459	0.444544	0.421456	0.909334	-0.00466987	0.908894	0.990797	0.556907	0.963876	0.988284	0.83181	0.978009	0.352315	0.821094	0.783664	0.923001	0.181988	0.781097
gene13001	0.932661	0.642028	0.880193	0.63448	0.720235	0.827325	0.885246	0.839096	0.708687	0.719284	0.641653	0.65954	0.892243	0.918146	0.944954	0.619347	0.562647	0.781139	0.547047	0.844371	0.929218	0.897356	0.914431	0.754581	0.880143	0.656549	0.972903	0.813484	0.798891	0.924356	0.614627	0.925438	0.762011	0.89694	0.729595	0.658574	0.79638	0.686971	0.773157	0.770157	0.68165	0.740136	0.739555	0.757072	0.85137	0.962083	0.809194	0.775975	0.95448
gene15025	0.800283	0.888846	0.858832	0.973466	0.999775	0.969055	0.663527	0.778524	0.985501	0.971183	0.925724	0.962616	0.924924	0.902966	0.674933	0.965092	0.939653	0.696067	0.915595	0.921831	0.899138	0.840526	0.681862	0.485076	0.765137	0.966099	0.79225	0.9514	0.51687	0.933161	0.957404	0.697779	0.636599	0.617175	0.987674	0.260261	0.971339	0.979953	0.626528	0.940722	0.976414	0.94627	0.986402	0.613023	0.828881	0.878328	0.956811	0.433951	0.846647
gene15456	0.906454	0.745763	0.988687	0.885859	0.892835	0.979166	0.917482	0.92873	0.918925	0.841414	0.868054	0.915931	0.984985	0.892216	0.776091	0.871097	0.853611	0.685505	0.846694	0.858632	0.893759	0.846825	0.768124	0.442262	0.88317	0.828031	0.935641	0.886008	0.57744	0.956547	0.887369	0.769715	0.660548	0.646353	0.8841	0.341435	0.948173	0.915616	0.66385	0.947539	0.894648	0.831338	0.925714	0.553927	0.919983	0.932976	0.918057	0.487763	0.948199
gene16376	0.805529	0.903746	0.833619	0.79721	0.863929	0.893438	0.786172	0.71786	0.852942	0.835556	0.866442	0.804299	0.940334	0.895495	0.924711	0.811631	0.68983	0.928244	0.696221	0.978383	0.957173	0.991338	0.940567	0.712203	0.733699	0.808088	0.865463	0.893346	0.80195	0.969127	0.743411	0.90553	0.884272	0.793775	0.896227	0.624981	0.868631	0.831773	0.58215	0.88459	0.823582	0.934842	0.85357	0.821199	0.745281	0.940546	0.937437	0.762987	0.968408
gene16507	0.936563	0.743053	0.933972	0.885715	0.935205	0.969479	0.812096	0.871144	0.912654	0.878739	0.851381	0.89716	0.923105	0.936754	0.748602	0.855434	0.877312	0.66581	0.818758	0.872226	0.925716	0.829578	0.729284	0.508092	0.847238	0.845961	0.916431	0.880286	0.609569	0.944442	0.899851	0.789883	0.656226	0.667869	0.932468	0.367635	0.990373	0.908343	0.686009	0.875602	0.88619	0.870766	0.925148	0.633473	0.899679	0.908175	0.876226	0.503126	0.866171
gene17741	0.810359	0.756005	0.874987	0.952771	0.959074	0.95425	0.695033	0.807189	0.951099	0.890686	0.896707	0.956456	0.872505	0.837857	0.564857	0.92702	0.96537	0.550032	0.915435	0.80892	0.819006	0.720803	0.561735	0.306718	0.749274	0.889012	0.778709	0.853343	0.415367	0.866271	0.972444	0.613156	0.527728	0.471171	0.943816	0.142036	0.977486	0.956236	0.565406	0.886664	0.933562	0.856976	0.949474	0.474218	0.835222	0.797428	0.861067	0.288519	0.76048
gene17900	0.923641	0.683987	0.839108	0.627104	0.738956	0.822517	0.862164	0.754974	0.70012	0.694904	0.696683	0.649905	0.859247	0.90769	0.969417	0.612336	0.553911	0.849792	0.508199	0.876501	0.95149	0.928513	0.948256	0.771864	0.782417	0.625973	0.953508	0.767433	0.89304	0.923451	0.608385	0.981189	0.86221	0.859749	0.780214	0.753207	0.831584	0.678046	0.656058	0.724873	0.655255	0.801274	0.72011	0.850238	0.774078	0.925573	0.778713	0.840126	0.917297
gene19295	0.733929	0.798542	0.865032	0.994264	0.96567	0.953739	0.659922	0.80392	0.985351	0.920689	0.916669	0.994747	0.892216	0.799554	0.511909	0.981891	0.993464	0.529651	0.982054	0.803156	0.776359	0.70414	0.521367	0.245562	0.743186	0.941168	0.723078	0.889484	0.315794	0.853044	0.999232	0.530629	0.47303	0.429244	0.933956	0.035119	0.942909	0.991681	0.553825	0.944971	0.981545	0.851093	0.979053	0.392466	0.826885	0.787472	0.908369	0.209307	0.772341
gene19584	0.366749	0.511497	0.313228	0.134695	0.241518	0.302866	0.45597	0.214712	0.226527	0.269419	0.306819	0.144652	0.463853	0.453638	0.812025	0.179785	-0.0388276	0.810064	0.0149842	0.592203	0.567694	0.71883	0.832698	0.774676	0.306191	0.21981	0.488349	0.403009	0.801047	0.524094	0.0365781	0.735846	0.779568	0.716474	0.311598	0.840164	0.246918	0.187736	0.281815	0.344822	0.196827	0.465364	0.233009	0.752401	0.224554	0.561977	0.456281	0.878676	0.63877
gene19910	0.797538	0.867522	0.884955	0.988146	0.994762	0.97935	0.691877	0.813656	0.996544	0.965158	0.92875	0.983298	0.938756	0.886225	0.646782	0.979398	0.960757	0.657609	0.946727	0.897193	0.875437	0.815662	0.653648	0.423224	0.78662	0.96797	0.794695	0.950117	0.464569	0.927107	0.976964	0.661345	0.595538	0.581422	0.974258	0.199863	0.969523	0.994107	0.627807	0.963538	0.989852	0.921007	0.996568	0.548643	0.851978	0.874539	0.961121	0.378384	0.852638
gene21025	0.908096	0.813555	0.967561	0.90914	0.935335	0.991352	0.872461	0.89522	0.943708	0.891592	0.895861	0.927559	0.991422	0.93042	0.808201	0.897457	0.865992	0.745031	0.852318	0.91593	0.938028	0.894059	0.803749	0.521449	0.868354	0.873395	0.931305	0.925747	0.628047	0.983727	0.900289	0.809077	0.711769	0.696101	0.932308	0.391805	0.970999	0.936567	0.676399	0.955501	0.920553	0.893975	0.950515	0.635434	0.906463	0.954666	0.950335	0.544966	0.956871
gene21498	0.806979	0.797026	0.931025	0.959931	0.938928	0.969468	0.758618	0.895767	0.974021	0.937207	0.865035	0.966881	0.966321	0.871591	0.642558	0.951993	0.930754	0.599539	0.948559	0.846337	0.840457	0.784287	0.641307	0.389027	0.87041	0.945207	0.825274	0.955944	0.39829	0.918764	0.949536	0.622615	0.520353	0.602526	0.895964	0.14265	0.918061	0.972324	0.705645	0.990452	0.977584	0.835554	0.982238	0.452924	0.912673	0.900261	0.965362	0.336246	0.895582
gene21972	0.614029	0.659365	0.482901	0.342153	0.499033	0.527581	0.585882	0.33384	0.42654	0.445767	0.547253	0.349231	0.594162	0.666165	0.933905	0.360187	0.208328	0.939063	0.172019	0.782098	0.790743	0.871544	0.946066	0.847727	0.392915	0.373221	0.675412	0.520413	0.994812	0.711436	0.277723	0.942506	0.966257	0.770281	0.599431	0.95844	0.559216	0.392339	0.319284	0.447152	0.367702	0.714135	0.427592	0.961123	0.367799	0.689473	0.566116	0.980615	0.715956
gene22116	0.759112	0.802654	0.883881	0.992616	0.967225	0.96082	0.670236	0.840216	0.990244	0.950099	0.889578	0.990417	0.917946	0.836908	0.54551	0.980766	0.983612	0.540824	0.983205	0.821202	0.801358	0.726855	0.548883	0.308135	0.801261	0.965916	0.753187	0.932551	0.324682	0.876794	0.991186	0.550011	0.466769	0.504792	0.924212	0.0504699	0.933811	0.993273	0.638854	0.966339	0.994452	0.847501	0.992058	0.409121	0.868655	0.833095	0.938048	0.240707	0.811776
gene22154	0.67491	0.927022	0.828859	0.921776	0.912196	0.92216	0.733016	0.700748	0.94032	0.847954	0.978254	0.932677	0.930227	0.77013	0.70828	0.943144	0.843183	0.789448	0.870327	0.904966	0.828868	0.869788	0.748618	0.391811	0.644222	0.868944	0.734488	0.867457	0.550419	0.900768	0.880618	0.689914	0.737808	0.509552	0.92997	0.318318	0.889167	0.934909	0.408605	0.954641	0.916487	0.925375	0.917563	0.5811	0.704748	0.823489	0.948367	0.469056	0.88279
gene23812	0.879662	0.768306	0.956349	0.940229	0.942702	0.981128	0.790781	0.929256	0.961524	0.941105	0.839103	0.947792	0.971638	0.923413	0.690651	0.921979	0.919173	0.609729	0.915816	0.859293	0.884398	0.804089	0.676189	0.457493	0.916694	0.93195	0.883881	0.961325	0.460202	0.943626	0.938496	0.684053	0.543494	0.670466	0.901911	0.209111	0.944017	0.957869	0.770403	0.969003	0.961162	0.837835	0.978064	0.508643	0.95288	0.935394	0.953516	0.395051	0.909799
gene24416	0.82659	0.871272	0.910875	0.870983	0.895347	0.945413	0.833805	0.825849	0.91463	0.87558	0.883889	0.885113	0.987904	0.896338	0.849001	0.879518	0.787159	0.824154	0.809384	0.940968	0.926333	0.93666	0.8596	0.585929	0.819088	0.86437	0.884193	0.932919	0.661769	0.975146	0.831876	0.817648	0.765519	0.734796	0.898365	0.453106	0.897153	0.900949	0.641067	0.959569	0.896517	0.900163	0.917529	0.676249	0.837763	0.954651	0.973771	0.615487	0.985402
gene25233	0.580089	0.613406	0.465183	0.28011	0.425998	0.477665	0.586962	0.339727	0.372943	0.406435	0.4673	0.290431	0.584127	0.636542	0.93896	0.304714	0.130744	0.918345	0.124529	0.742689	0.75303	0.852029	0.9483	0.867835	0.417012	0.335353	0.663444	0.510662	0.965084	0.683685	0.204807	0.915475	0.925022	0.808352	0.513657	0.953988	0.4753	0.335602	0.363389	0.434821	0.323983	0.641771	0.380652	0.919827	0.36527	0.692353	0.553411	0.98629	0.732594
gene25518	0.840064	0.785122	0.750776	0.661783	0.787306	0.810069	0.745756	0.61958	0.723439	0.715988	0.777476	0.669365	0.813393	0.873956	0.933567	0.656113	0.580509	0.90873	0.51855	0.919079	0.948284	0.944973	0.933053	0.763616	0.639268	0.654873	0.859373	0.750662	0.917915	0.903696	0.632171	0.971035	0.927332	0.784208	0.852491	0.769603	0.852774	0.701235	0.511648	0.701635	0.671232	0.889297	0.727689	0.915988	0.659034	0.861114	0.777047	0.845619	0.850854
gene26278	0.78587	0.897546	0.899982	0.972168	0.972523	0.979526	0.747586	0.815788	0.989934	0.941506	0.946554	0.975451	0.97148	0.875544	0.709256	0.974943	0.919778	0.727027	0.929084	0.921231	0.88599	0.864768	0.725064	0.448057	0.785395	0.948447	0.813417	0.952443	0.516782	0.948413	0.946974	0.701065	0.661542	0.606066	0.961076	0.265173	0.948976	0.984719	0.60073	0.989899	0.979323	0.928403	0.985708	0.57545	0.839199	0.899246	0.986488	0.442261	0.909752
gene27016	0.769105	0.860027	0.891036	0.967913	0.95593	0.960627	0.706923	0.838935	0.982533	0.959205	0.889208	0.965923	0.960087	0.871524	0.65761	0.968443	0.922078	0.65439	0.944251	0.884261	0.854002	0.817098	0.665833	0.434853	0.824984	0.969107	0.792151	0.972467	0.429102	0.923768	0.943098	0.636478	0.56535	0.617637	0.92074	0.178454	0.911859	0.977606	0.674936	0.992269	0.98695	0.879467	0.986719	0.506783	0.868079	0.896925	0.985915	0.376135	0.894181
gene2705	0.634919	0.866957	0.584232	0.576996	0.697757	0.683203	0.579605	0.43839	0.646629	0.681108	0.717859	0.566972	0.748764	0.774709	0.929264	0.606719	0.431057	0.99076	0.430122	0.92346	0.878303	0.962095	0.955891	0.848619	0.502318	0.635883	0.702323	0.739963	0.908352	0.834014	0.493639	0.915297	0.955154	0.810277	0.766427	0.811749	0.682031	0.613652	0.429972	0.667124	0.610826	0.871777	0.644435	0.947382	0.491529	0.805301	0.782796	0.907463	0.83069
gene27291	0.701482	0.802477	0.630896	0.595585	0.710269	0.698212	0.553081	0.562061	0.666486	0.773153	0.608058	0.573911	0.77768	0.858311	0.895842	0.611691	0.467131	0.875472	0.478587	0.899607	0.891644	0.918532	0.893987	0.911653	0.676153	0.71906	0.748785	0.841152	0.794268	0.849469	0.518098	0.86205	0.792749	0.936735	0.725888	0.693224	0.665048	0.631567	0.69301	0.70344	0.66146	0.808854	0.691323	0.874594	0.636074	0.880484	0.822622	0.838978	0.857648
gene30272	0.93513	0.381154	0.899537	0.552868	0.596786	0.762212	0.91711	0.925336	0.61446	0.59609	0.485962	0.597646	0.812098	0.821192	0.770743	0.513483	0.541661	0.503708	0.519626	0.631289	0.777975	0.684388	0.713159	0.529576	0.935122	0.536996	0.952982	0.693462	0.578201	0.802225	0.577691	0.75291	0.503725	0.756966	0.571149	0.434919	0.720372	0.605016	0.812226	0.689287	0.595075	0.519148	0.656955	0.486939	0.904983	0.867649	0.668098	0.538965	0.847431
gene30774	0.793945	0.828179	0.906067	0.986605	0.973501	0.976045	0.70965	0.857662	0.993743	0.960516	0.896893	0.985945	0.948451	0.8736	0.61682	0.977087	0.963972	0.602859	0.966181	0.861602	0.845988	0.781555	0.619257	0.381536	0.829517	0.969125	0.797236	0.956683	0.397194	0.914668	0.978192	0.615237	0.528433	0.57321	0.936347	0.131183	0.944928	0.993061	0.670151	0.98129	0.995191	0.872998	0.997953	0.473913	0.886745	0.878314	0.963617	0.32177	0.861119
gene3090	0.687141	0.766218	0.785627	0.710084	0.7215	0.785727	0.728954	0.740157	0.764015	0.767323	0.692794	0.720682	0.890205	0.786004	0.796013	0.732681	0.59884	0.752412	0.670226	0.827435	0.803567	0.849177	0.805034	0.609463	0.775614	0.759486	0.775562	0.863289	0.573209	0.857787	0.647679	0.714511	0.655147	0.758699	0.704733	0.424265	0.687248	0.744025	0.662823	0.866519	0.766349	0.738664	0.777014	0.588643	0.748757	0.886957	0.892762	0.59687	0.933015
gene32297	0.720588	0.949195	0.78824	0.955591	0.986371	0.929617	0.588675	0.690252	0.969413	0.970172	0.929998	0.93527	0.900835	0.871872	0.680946	0.961702	0.895369	0.752609	0.888029	0.944921	0.886856	0.863894	0.701842	0.528093	0.69203	0.970811	0.727688	0.951672	0.535982	0.915493	0.91742	0.691904	0.676232	0.623141	0.982449	0.295395	0.924841	0.959454	0.572104	0.929235	0.963455	0.9704	0.964794	0.654955	0.750676	0.85557	0.966441	0.473644	0.835815
gene33112	0.451999	0.405393	0.26285	0.0334688	0.208462	0.258605	0.439325	0.143627	0.129222	0.178509	0.252739	0.0437699	0.355636	0.470837	0.835231	0.0511325	-0.102091	0.799133	-0.136268	0.558138	0.595499	0.689829	0.835475	0.832889	0.232672	0.0898377	0.518233	0.276782	0.944299	0.488102	-0.0309981	0.833627	0.843731	0.713575	0.315202	0.99763	0.288047	0.0907961	0.225204	0.17406	0.0715861	0.455921	0.139576	0.876247	0.169887	0.502531	0.307634	0.970084	0.528161
gene33725	0.751539	0.850602	0.886229	0.995964	0.974221	0.970974	0.69989	0.81683	0.997868	0.939312	0.936266	0.99758	0.936423	0.832617	0.594263	0.99196	0.970726	0.614699	0.974591	0.857721	0.822603	0.77576	0.607959	0.326591	0.76877	0.95716	0.760879	0.928269	0.38996	0.898398	0.98579	0.596163	0.548495	0.504744	0.948099	0.119433	0.945415	0.999365	0.579496	0.979753	0.993323	0.886932	0.992119	0.460864	0.838831	0.841231	0.955242	0.300409	0.840625
gene3586	0.84778	0.669612	0.734658	0.59758	0.715042	0.74229	0.645687	0.719133	0.669285	0.786423	0.537622	0.58528	0.802211	0.932717	0.884586	0.584978	0.51532	0.75271	0.497916	0.848374	0.914795	0.864802	0.848571	0.894853	0.834635	0.713852	0.861104	0.855718	0.750457	0.870573	0.556462	0.867222	0.685542	0.986454	0.704273	0.633222	0.716097	0.638984	0.866062	0.700709	0.668006	0.739284	0.71388	0.808895	0.788691	0.932585	0.796781	0.781321	0.868624
gene4190	0.800923	0.553901	0.768956	0.466559	0.543858	0.681986	0.852776	0.724667	0.552617	0.55093	0.521599	0.501932	0.798255	0.778227	0.934144	0.467984	0.364673	0.775211	0.383525	0.745345	0.816274	0.843164	0.913378	0.735231	0.769737	0.492495	0.881715	0.682947	0.797855	0.817207	0.428675	0.880458	0.757205	0.855164	0.565943	0.715159	0.62285	0.527023	0.658729	0.664178	0.52317	0.612565	0.579325	0.713296	0.713476	0.870837	0.704322	0.807307	0.907133
gene4293	0.736846	0.79601	0.706357	0.579749	0.681889	0.733791	0.743093	0.588453	0.658137	0.664967	0.701313	0.591058	0.822861	0.812479	0.980285	0.600898	0.444172	0.960966	0.454015	0.904326	0.899516	0.969728	0.992354	0.821087	0.637023	0.61634	0.817529	0.757238	0.907822	0.878887	0.511425	0.948272	0.93343	0.850552	0.737202	0.805514	0.707283	0.62783	0.525704	0.719211	0.620758	0.821363	0.664255	0.891075	0.611867	0.87586	0.802598	0.90401	0.915876
gene5151	0.874582	0.761127	0.776203	0.642377	0.767227	0.802275	0.739858	0.700777	0.716397	0.774236	0.676175	0.641989	0.851045	0.939145	0.969785	0.636879	0.547224	0.884649	0.516723	0.925072	0.972273	0.957096	0.952125	0.883131	0.775672	0.704953	0.90292	0.840539	0.883137	0.929139	0.599435	0.968855	0.854129	0.943909	0.795625	0.752825	0.79977	0.687374	0.725057	0.736885	0.689457	0.841609	0.742484	0.905493	0.753587	0.946421	0.827715	0.871864	0.917158
gene6423	0.728062	0.690388	0.557693	0.461591	0.63138	0.62812	0.57924	0.426898	0.53426	0.581423	0.602186	0.456122	0.642409	0.783291	0.911774	0.458964	0.3649	0.895154	0.289909	0.835138	0.869733	0.87987	0.907282	0.865807	0.492518	0.49971	0.740844	0.617388	0.966613	0.777197	0.419087	0.956413	0.92116	0.809337	0.713455	0.884846	0.689671	0.503631	0.448293	0.502884	0.481541	0.789824	0.54461	0.978814	0.488255	0.750378	0.623913	0.928251	0.720861
gene8251	0.835621	0.875634	0.847074	0.838541	0.900959	0.90836	0.716775	0.784047	0.887316	0.928393	0.804716	0.829871	0.945951	0.953736	0.859459	0.841529	0.751839	0.824882	0.758796	0.963194	0.960068	0.942526	0.856732	0.736525	0.835183	0.897732	0.86779	0.973686	0.686966	0.970268	0.791152	0.83741	0.7441	0.854691	0.89279	0.495803	0.871649	0.866261	0.757622	0.909411	0.882602	0.908765	0.9055	0.759412	0.836979	0.974206	0.967605	0.673873	0.954938
gene864	0.946889	0.541923	0.884446	0.581991	0.663602	0.797334	0.91424	0.859002	0.656055	0.65237	0.582963	0.616869	0.857228	0.88548	0.911907	0.55731	0.529391	0.70705	0.503791	0.772928	0.88653	0.835921	0.871018	0.697524	0.8881	0.584945	0.979911	0.750817	0.767181	0.883866	0.57894	0.898311	0.706809	0.858981	0.670287	0.633115	0.770527	0.637628	0.77022	0.72082	0.625375	0.663845	0.690509	0.695597	0.857744	0.928896	0.742681	0.73369	0.918622
gene866	0.737666	0.471062	0.715978	0.385849	0.451218	0.604337	0.817216	0.691015	0.473161	0.475228	0.429239	0.424429	0.739755	0.706651	0.882428	0.389707	0.282886	0.706904	0.31795	0.662967	0.73738	0.77251	0.859208	0.694944	0.741438	0.419784	0.827956	0.62113	0.733381	0.745174	0.346568	0.812173	0.682557	0.822929	0.464942	0.674035	0.527679	0.447622	0.644048	0.606944	0.449823	0.514921	0.502942	0.636413	0.670676	0.816435	0.640556	0.762016	0.861082
gene925	0.744908	0.914052	0.70197	0.731031	0.838608	0.809419	0.611324	0.588569	0.788982	0.844348	0.785005	0.7126	0.846652	0.895393	0.906415	0.746274	0.613985	0.938319	0.60395	0.981256	0.952006	0.977809	0.919082	0.839572	0.656664	0.801652	0.782637	0.881827	0.829132	0.919951	0.663025	0.901588	0.878996	0.857659	0.873212	0.680327	0.805915	0.76026	0.601357	0.788411	0.768402	0.938191	0.79705	0.909572	0.658063	0.899747	0.891653	0.819625	0.886817
MSTRG.100547	0.825298	0.882416	0.908652	0.884039	0.908966	0.951258	0.820824	0.822855	0.92565	0.88996	0.892679	0.895544	0.988476	0.901685	0.841418	0.892209	0.801843	0.822816	0.821902	0.947458	0.929929	0.936932	0.852533	0.585682	0.817036	0.879484	0.879057	0.94184	0.655328	0.977583	0.844959	0.813063	0.762083	0.732262	0.910912	0.44253	0.905817	0.912184	0.642956	0.964364	0.908618	0.911197	0.928266	0.678277	0.83875	0.954437	0.980316	0.607714	0.980932
MSTRG.100996	0.770655	0.866666	0.874383	0.991184	0.987356	0.968899	0.668053	0.812829	0.997506	0.973314	0.913918	0.983786	0.936216	0.873224	0.621067	0.985509	0.961114	0.635088	0.960005	0.884642	0.854833	0.798553	0.629136	0.40918	0.790989	0.981783	0.772113	0.960854	0.419937	0.914282	0.975673	0.624737	0.558365	0.576008	0.957268	0.155944	0.946108	0.995082	0.642291	0.973215	0.998099	0.904509	0.998701	0.513713	0.85201	0.868912	0.968947	0.345825	0.848819
MSTRG.101446	0.740176	0.758428	0.853753	0.979649	0.95558	0.941379	0.645921	0.795912	0.967029	0.900514	0.897874	0.980403	0.862044	0.788593	0.480473	0.959949	0.994376	0.488609	0.966566	0.773252	0.759571	0.668677	0.48471	0.217532	0.729694	0.917115	0.714446	0.858088	0.299518	0.82979	0.995726	0.514228	0.444888	0.399386	0.924745	0.0165668	0.945609	0.975512	0.542311	0.910361	0.960522	0.83018	0.961664	0.374416	0.820279	0.759804	0.870128	0.18035	0.73239
MSTRG.102721	0.881895	0.732805	0.85559	0.660253	0.744024	0.833845	0.866786	0.782686	0.734458	0.733243	0.708431	0.682153	0.907465	0.901812	0.97173	0.659619	0.564213	0.865238	0.562447	0.894854	0.941459	0.948983	0.95952	0.768433	0.818394	0.680349	0.940747	0.827186	0.839119	0.940211	0.622352	0.944783	0.839718	0.881488	0.768398	0.699358	0.799855	0.710669	0.692512	0.798555	0.703532	0.801547	0.754188	0.80568	0.795603	0.958523	0.847159	0.817774	0.974388
MSTRG.105948	0.845191	0.567772	0.661053	0.48992	0.6392	0.661784	0.589152	0.65181	0.565222	0.703399	0.436705	0.475213	0.703254	0.903226	0.86312	0.46534	0.42364	0.70439	0.37269	0.782858	0.881754	0.80612	0.813825	0.925241	0.780972	0.610846	0.834057	0.762571	0.781064	0.804271	0.461588	0.871795	0.664023	0.985877	0.63856	0.68966	0.666737	0.533624	0.848896	0.571945	0.557308	0.673182	0.616296	0.834013	0.731286	0.87094	0.683217	0.806704	0.779098
MSTRG.1064	0.373312	0.371723	0.196171	-0.0306348	0.137039	0.186893	0.381384	0.0850634	0.066812	0.126862	0.186571	-0.0223755	0.305176	0.408122	0.800133	-0.00504586	-0.178333	0.772348	-0.192632	0.509078	0.534	0.64884	0.804175	0.823746	0.185653	0.0429217	0.452938	0.236197	0.902814	0.429794	-0.105815	0.780418	0.803393	0.696211	0.239815	0.979542	0.199254	0.0264671	0.197826	0.130604	0.0158277	0.395233	0.0775709	0.836781	0.109434	0.456226	0.268511	0.952703	0.492359
MSTRG.107858	0.867776	0.72666	0.9094	0.714401	0.75894	0.874515	0.943433	0.821469	0.776698	0.705707	0.786745	0.752938	0.936663	0.848454	0.919109	0.715236	0.632617	0.827041	0.638605	0.864487	0.899468	0.917279	0.917776	0.598273	0.801504	0.673609	0.93754	0.796453	0.770952	0.934714	0.68959	0.891776	0.819125	0.743362	0.787004	0.603745	0.83616	0.761891	0.590093	0.846912	0.736955	0.795562	0.782538	0.7	0.802668	0.925977	0.851818	0.712922	0.976049
MSTRG.109845	0.873319	0.840822	0.834415	0.798403	0.892185	0.906414	0.774164	0.712761	0.844798	0.821004	0.869875	0.804546	0.889378	0.915973	0.882624	0.789419	0.735345	0.866682	0.679852	0.950735	0.968631	0.943617	0.884104	0.674836	0.711196	0.776963	0.883462	0.838337	0.819731	0.952497	0.777648	0.920301	0.868323	0.740359	0.936201	0.624251	0.940347	0.829032	0.557797	0.81347	0.801403	0.941563	0.846536	0.838991	0.751016	0.899552	0.863655	0.730746	0.885273
MSTRG.110499	0.70547	0.460514	0.557992	0.241214	0.386679	0.495579	0.704603	0.478492	0.339525	0.366893	0.382671	0.268349	0.597446	0.676098	0.943558	0.241719	0.129132	0.810595	0.102387	0.672414	0.755279	0.797609	0.922624	0.83936	0.549646	0.278537	0.769913	0.486265	0.942246	0.68825	0.19902	0.927882	0.840636	0.842833	0.456503	0.928533	0.493615	0.306298	0.491422	0.412567	0.289102	0.545849	0.363778	0.850276	0.486662	0.727972	0.503567	0.9511	0.746603
MSTRG.111187	0.900559	0.865702	0.892917	0.853032	0.927423	0.950673	0.803425	0.798123	0.900145	0.891989	0.874698	0.857592	0.954855	0.961607	0.890882	0.846187	0.785102	0.853737	0.755402	0.974828	0.990815	0.961799	0.888403	0.689171	0.80956	0.854606	0.920194	0.92356	0.767205	0.99399	0.826311	0.903269	0.822911	0.79678	0.946287	0.560273	0.952136	0.883762	0.669658	0.894551	0.871767	0.946097	0.909227	0.799796	0.836604	0.964555	0.93792	0.701619	0.950359
MSTRG.111188	0.923049	0.814883	0.914279	0.804632	0.877931	0.93488	0.863766	0.82889	0.860683	0.844056	0.833424	0.819603	0.960264	0.954731	0.92611	0.796907	0.732851	0.852817	0.710453	0.950757	0.984917	0.962019	0.918014	0.699725	0.840026	0.801526	0.955335	0.898604	0.79196	0.992002	0.779768	0.926483	0.828859	0.823279	0.897336	0.600099	0.923987	0.843319	0.689834	0.880672	0.829479	0.900029	0.873619	0.791543	0.852712	0.978212	0.9169	0.733368	0.975997
MSTRG.111189	0.930995	0.754857	0.975352	0.864251	0.892494	0.966992	0.881759	0.935381	0.906657	0.881915	0.813745	0.883226	0.988915	0.946797	0.820473	0.848716	0.820617	0.70892	0.816604	0.887673	0.932617	0.876775	0.80286	0.567494	0.932569	0.855471	0.95626	0.935137	0.611862	0.976473	0.855295	0.805673	0.662145	0.764995	0.873053	0.391672	0.927899	0.896852	0.775786	0.941079	0.892971	0.835261	0.925962	0.615814	0.947614	0.980593	0.939054	0.555209	0.972529
MSTRG.111240	0.700316	0.757452	0.843867	0.986583	0.94466	0.930479	0.626703	0.793289	0.970072	0.900713	0.891368	0.986922	0.859976	0.760173	0.443159	0.971695	0.998562	0.460162	0.987957	0.753038	0.726276	0.644233	0.451499	0.17598	0.724673	0.927367	0.682829	0.861488	0.239893	0.810812	0.99839	0.463433	0.402264	0.369878	0.904609	-0.0444402	0.918714	0.979706	0.535565	0.92535	0.97029	0.809044	0.963325	0.319708	0.813475	0.744422	0.877167	0.129961	0.726211
MSTRG.112260	0.898872	0.821273	0.851876	0.846221	0.934071	0.930626	0.732559	0.759405	0.882773	0.88434	0.853542	0.8433	0.891491	0.950065	0.818118	0.826413	0.807154	0.78285	0.742477	0.936183	0.966856	0.899263	0.808136	0.651068	0.767568	0.840456	0.882825	0.88254	0.730368	0.951612	0.837122	0.864879	0.769614	0.741965	0.953877	0.514286	0.967234	0.869833	0.647501	0.832013	0.852143	0.933724	0.892919	0.783096	0.812572	0.908278	0.878043	0.642072	0.860846
MSTRG.11689	0.705389	0.834327	0.649613	0.58395	0.702451	0.714735	0.649403	0.52735	0.659385	0.699509	0.696061	0.57994	0.791589	0.822023	0.963224	0.606678	0.444365	0.973937	0.445999	0.925669	0.907162	0.972948	0.977388	0.872657	0.597505	0.647762	0.772821	0.773792	0.911157	0.868099	0.50765	0.941039	0.935016	0.870129	0.758176	0.811621	0.700855	0.62626	0.528602	0.696959	0.627192	0.852585	0.666515	0.935578	0.57475	0.861115	0.804389	0.91681	0.880336
MSTRG.118547	0.819553	0.780334	0.91145	0.979565	0.970309	0.974004	0.705709	0.875145	0.98339	0.953784	0.871257	0.979129	0.929042	0.879071	0.587311	0.960028	0.976098	0.550217	0.961649	0.832425	0.837191	0.745236	0.580354	0.359817	0.845097	0.956852	0.805015	0.94016	0.372691	0.900272	0.984715	0.599676	0.485497	0.560276	0.92816	0.101572	0.955141	0.984964	0.693715	0.956371	0.984682	0.848282	0.991811	0.449172	0.906674	0.865977	0.933557	0.286974	0.830876
MSTRG.118549	0.725598	0.880924	0.87666	0.968959	0.9457	0.952903	0.712559	0.804752	0.981107	0.930266	0.92333	0.97162	0.955635	0.827928	0.648412	0.977255	0.915112	0.675258	0.946148	0.880476	0.830111	0.818466	0.668548	0.385965	0.771767	0.950038	0.762365	0.944774	0.428197	0.910504	0.939454	0.623168	0.592039	0.559365	0.921297	0.177456	0.90199	0.977646	0.588301	0.996164	0.979821	0.886268	0.975633	0.492868	0.822573	0.867428	0.98178	0.366522	0.888419
MSTRG.118550	0.780907	0.711117	0.896084	0.961187	0.928567	0.940046	0.67358	0.889274	0.958259	0.932059	0.81008	0.961472	0.89895	0.834496	0.502921	0.939094	0.970895	0.445862	0.969875	0.758839	0.768463	0.663808	0.490625	0.282021	0.858403	0.943306	0.764175	0.920108	0.254731	0.847671	0.972535	0.503487	0.367365	0.512848	0.865184	-0.016216	0.903683	0.963095	0.718596	0.942874	0.971101	0.769569	0.971046	0.333838	0.915094	0.828684	0.903204	0.179869	0.790688
MSTRG.118565	0.772353	0.57408	0.64272	0.38434	0.521731	0.604901	0.709361	0.582513	0.478363	0.541854	0.458878	0.397375	0.706007	0.795392	0.969082	0.384741	0.269771	0.838608	0.255919	0.773889	0.845034	0.866762	0.945167	0.904232	0.676518	0.458746	0.829261	0.6536	0.91048	0.787625	0.334004	0.942806	0.825691	0.940016	0.563661	0.861156	0.584645	0.443697	0.650029	0.548574	0.446276	0.643853	0.510388	0.872416	0.612983	0.839994	0.647273	0.936534	0.836236
MSTRG.120524	0.832442	0.861572	0.926424	0.922294	0.93716	0.978953	0.844563	0.819128	0.94952	0.863232	0.957765	0.942027	0.971255	0.866918	0.778361	0.921501	0.870061	0.776243	0.861604	0.91797	0.904302	0.892928	0.793274	0.451196	0.765977	0.8596	0.867212	0.886613	0.62365	0.959106	0.906472	0.782523	0.751818	0.598389	0.952199	0.383141	0.965918	0.944681	0.533499	0.953178	0.918012	0.922824	0.940542	0.62756	0.822357	0.897949	0.942472	0.523346	0.926527
MSTRG.120831	0.725664	0.676062	0.63875	0.470124	0.589069	0.638048	0.645498	0.581795	0.556611	0.642304	0.510399	0.468862	0.747669	0.815758	0.942243	0.482272	0.340144	0.857085	0.354207	0.825974	0.856463	0.892413	0.929565	0.913041	0.690261	0.57569	0.790609	0.747124	0.844701	0.814005	0.40088	0.896481	0.800937	0.953596	0.613483	0.778714	0.594676	0.520644	0.686082	0.631095	0.541297	0.701233	0.586774	0.856766	0.627556	0.867401	0.737562	0.893839	0.864727
MSTRG.120960	0.825592	0.904766	0.884294	0.86238	0.907218	0.941475	0.8172	0.774417	0.907973	0.868115	0.911479	0.873412	0.972033	0.901228	0.880179	0.872092	0.772967	0.88043	0.778662	0.971387	0.950902	0.968592	0.895719	0.625569	0.767401	0.85073	0.878488	0.915531	0.734322	0.982061	0.820463	0.865093	0.836952	0.738265	0.929243	0.529889	0.915287	0.892471	0.587308	0.933402	0.880302	0.942694	0.906036	0.751968	0.793841	0.944548	0.962709	0.676564	0.972983
MSTRG.121729	0.916932	0.705418	0.911112	0.793425	0.843147	0.899979	0.785761	0.907585	0.842898	0.887873	0.689215	0.797345	0.936391	0.964203	0.810722	0.774341	0.745774	0.668568	0.743664	0.860385	0.921588	0.846456	0.778226	0.675807	0.958075	0.846661	0.930189	0.946264	0.593551	0.941415	0.776715	0.787726	0.595815	0.864397	0.805046	0.401392	0.852508	0.826734	0.892437	0.880562	0.845792	0.779721	0.879053	0.633781	0.945711	0.983533	0.908401	0.580368	0.940438
MSTRG.12351	0.797894	0.866221	0.894684	0.988889	0.991037	0.983562	0.712787	0.819676	0.997569	0.954439	0.938598	0.987876	0.945497	0.878506	0.651214	0.981199	0.960646	0.662123	0.94914	0.89504	0.872338	0.81807	0.659935	0.406535	0.784822	0.959355	0.799977	0.942897	0.467622	0.929017	0.978399	0.663732	0.603933	0.568487	0.97308	0.202028	0.971652	0.995886	0.61107	0.969475	0.988404	0.919193	0.995505	0.541214	0.85146	0.873646	0.961328	0.37734	0.860031
MSTRG.123756	0.641161	0.720511	0.559413	0.426116	0.559523	0.60056	0.657311	0.405971	0.507808	0.502058	0.628555	0.439016	0.675404	0.695675	0.955159	0.44911	0.287377	0.968067	0.269206	0.827413	0.8219	0.91396	0.974243	0.811989	0.447193	0.442318	0.717273	0.583869	0.979182	0.768121	0.358906	0.949771	0.984558	0.76499	0.653824	0.91913	0.613807	0.475926	0.334535	0.544426	0.450442	0.76132	0.504266	0.938604	0.427974	0.740732	0.645673	0.959181	0.787114
MSTRG.125330	0.691815	0.543455	0.631602	0.385927	0.477922	0.572055	0.670869	0.611047	0.474615	0.548766	0.399098	0.397821	0.709244	0.74222	0.88473	0.396125	0.264063	0.746392	0.301051	0.712672	0.764126	0.799724	0.862949	0.829524	0.714324	0.486721	0.770878	0.680353	0.746962	0.743485	0.324407	0.81353	0.686502	0.91361	0.484376	0.700896	0.497925	0.44127	0.705276	0.589612	0.4665	0.561192	0.511242	0.72168	0.632193	0.826168	0.669589	0.813317	0.838728
MSTRG.125373	0.718334	0.802671	0.857149	0.996661	0.963332	0.947502	0.641225	0.802789	0.987106	0.931212	0.906015	0.994359	0.892109	0.796581	0.500322	0.986507	0.992655	0.520316	0.98976	0.800266	0.768006	0.698044	0.510271	0.247976	0.748761	0.954444	0.710089	0.901951	0.291917	0.848008	0.99755	0.511562	0.452386	0.435627	0.925086	0.0125528	0.928022	0.992856	0.570552	0.952268	0.98868	0.84427	0.982256	0.377788	0.828356	0.788478	0.917192	0.195599	0.772875
MSTRG.125488	0.767962	0.806522	0.883788	0.994264	0.974712	0.965714	0.67436	0.832184	0.991468	0.946218	0.902864	0.992555	0.914339	0.839936	0.551731	0.980709	0.988042	0.551209	0.978455	0.827474	0.809653	0.732703	0.555538	0.308662	0.788525	0.959761	0.757655	0.92339	0.345474	0.880146	0.995695	0.56506	0.486382	0.497081	0.93811	0.0691806	0.948977	0.994892	0.61966	0.958263	0.991176	0.860354	0.991496	0.427337	0.861292	0.828804	0.93116	0.252065	0.805583
MSTRG.125621	0.685031	0.82712	0.694372	0.604824	0.687102	0.732061	0.718279	0.574928	0.678163	0.67868	0.721414	0.614188	0.830317	0.78386	0.947423	0.63466	0.460796	0.954998	0.491654	0.902635	0.87268	0.961105	0.969011	0.779711	0.618726	0.643901	0.778007	0.772089	0.854084	0.868634	0.52751	0.90044	0.910074	0.814867	0.736153	0.747013	0.6888	0.648772	0.499682	0.750152	0.647069	0.823817	0.679561	0.847575	0.595172	0.862582	0.82744	0.858777	0.917358
MSTRG.126907	0.893417	0.642902	0.75366	0.574875	0.713757	0.765633	0.768122	0.657184	0.642156	0.649317	0.660569	0.589144	0.764532	0.873412	0.918454	0.55163	0.518874	0.816327	0.43566	0.838408	0.921859	0.877409	0.894245	0.768426	0.686839	0.569567	0.893208	0.691289	0.905892	0.863238	0.566643	0.966503	0.85377	0.810209	0.769882	0.774278	0.816886	0.620768	0.585157	0.620857	0.589576	0.788333	0.660459	0.879135	0.693016	0.846936	0.69048	0.833834	0.811206
MSTRG.128010	0.849736	0.83809	0.937489	0.904384	0.916942	0.964832	0.822311	0.880136	0.94056	0.913378	0.864464	0.915543	0.994691	0.915211	0.794144	0.903997	0.841301	0.743791	0.860827	0.915577	0.914861	0.892245	0.794664	0.546054	0.875715	0.904115	0.890709	0.961359	0.577456	0.971277	0.876777	0.765161	0.674318	0.726893	0.898263	0.352469	0.912517	0.930095	0.714381	0.978764	0.932617	0.876106	0.950377	0.60753	0.896659	0.961704	0.98162	0.531349	0.97206
MSTRG.129317	0.727505	0.756273	0.868973	0.987719	0.946824	0.942952	0.655181	0.826742	0.975758	0.912905	0.883149	0.989633	0.883198	0.784797	0.471756	0.972221	0.996272	0.470606	0.990627	0.764834	0.745749	0.662271	0.476139	0.206072	0.76548	0.93642	0.714137	0.883749	0.254309	0.831396	0.998135	0.48462	0.407554	0.411501	0.902179	-0.0279471	0.922524	0.98403	0.581703	0.942366	0.978137	0.807991	0.973129	0.3299	0.845876	0.776275	0.895064	0.152664	0.757699
MSTRG.130946	0.925237	0.71312	0.993522	0.895883	0.903063	0.982876	0.895852	0.950973	0.923947	0.859403	0.844661	0.922301	0.972951	0.90553	0.736806	0.872439	0.881278	0.627709	0.863314	0.836906	0.88659	0.810908	0.719888	0.425368	0.909608	0.843112	0.936193	0.892534	0.531676	0.946294	0.907761	0.740029	0.601247	0.642096	0.882707	0.287129	0.958411	0.922555	0.709102	0.938746	0.904739	0.813406	0.936207	0.521206	0.94949	0.928286	0.906216	0.438835	0.92212
MSTRG.131460	0.624273	0.671141	0.52673	0.360483	0.499439	0.548792	0.632193	0.393739	0.449501	0.469887	0.544804	0.371669	0.645239	0.682832	0.958813	0.384153	0.214576	0.946282	0.206529	0.79398	0.798986	0.892607	0.970859	0.857058	0.458765	0.40361	0.705654	0.567457	0.9723	0.738885	0.287765	0.9393	0.951536	0.811765	0.585577	0.936199	0.547941	0.414125	0.381951	0.504684	0.399231	0.703577	0.454282	0.9316	0.418595	0.736667	0.615528	0.979306	0.778225
MSTRG.137709	0.558079	0.777879	0.624286	0.55551	0.60123	0.649832	0.640441	0.529151	0.623496	0.628634	0.641814	0.563507	0.77908	0.681938	0.847573	0.597572	0.401347	0.867172	0.475425	0.814786	0.759078	0.873182	0.876249	0.694537	0.578236	0.613363	0.673155	0.736777	0.709674	0.781674	0.465596	0.764112	0.789099	0.74818	0.629206	0.62022	0.566008	0.595004	0.474422	0.731221	0.609632	0.723229	0.624511	0.71016	0.53971	0.794602	0.796118	0.749115	0.870484
MSTRG.13774	0.802205	0.694732	0.706283	0.519805	0.644453	0.702991	0.721189	0.636959	0.605417	0.668024	0.575336	0.525112	0.792446	0.862968	0.979485	0.524076	0.40259	0.883501	0.39592	0.862974	0.908338	0.928215	0.963924	0.904393	0.725692	0.596919	0.857183	0.764979	0.893819	0.864727	0.463528	0.952425	0.849298	0.953207	0.677642	0.807163	0.678015	0.572128	0.687606	0.664146	0.579409	0.750307	0.63319	0.889791	0.67751	0.90298	0.761118	0.913187	0.897158
MSTRG.138105	0.824911	0.636716	0.718617	0.475804	0.60429	0.690582	0.782371	0.638693	0.564357	0.593857	0.567469	0.494556	0.773709	0.835157	0.992997	0.474583	0.36828	0.876908	0.346417	0.828636	0.894003	0.912912	0.974858	0.863948	0.704174	0.517309	0.880214	0.695662	0.932656	0.848821	0.432631	0.977785	0.875774	0.912385	0.652963	0.851849	0.679789	0.533571	0.628049	0.622738	0.523983	0.718732	0.588655	0.885825	0.661262	0.877664	0.706014	0.928278	0.882896
MSTRG.138341	0.753017	0.83705	0.87849	0.993017	0.972519	0.962274	0.669021	0.827337	0.994748	0.960605	0.901143	0.988798	0.930239	0.84674	0.578293	0.986638	0.970453	0.585565	0.977022	0.849454	0.819816	0.760196	0.585846	0.349376	0.796239	0.976023	0.755922	0.949065	0.359107	0.892532	0.982033	0.576141	0.505348	0.535222	0.93372	0.0906678	0.930485	0.995117	0.638264	0.977386	0.998965	0.870415	0.995645	0.447543	0.858653	0.849789	0.958668	0.28414	0.834491
MSTRG.138343	0.906708	0.850299	0.909312	0.838883	0.907611	0.948843	0.838717	0.818228	0.889822	0.873511	0.864399	0.849275	0.966647	0.956095	0.907626	0.833562	0.766745	0.856811	0.745912	0.966816	0.986885	0.965642	0.904524	0.685665	0.82695	0.836742	0.936661	0.918249	0.772262	0.996997	0.811278	0.909999	0.826158	0.804872	0.925666	0.570553	0.939542	0.873228	0.676238	0.901067	0.860835	0.927299	0.899617	0.787994	0.84722	0.97457	0.938221	0.711053	0.971313
MSTRG.138344	0.82602	0.87152	0.894612	0.972355	0.992992	0.985448	0.727589	0.809305	0.986298	0.946098	0.942287	0.971734	0.943497	0.899116	0.694185	0.962364	0.941768	0.701415	0.916532	0.916063	0.902258	0.846779	0.700896	0.454983	0.778371	0.941441	0.824299	0.934295	0.535155	0.944231	0.962656	0.717051	0.656334	0.599713	0.986578	0.275596	0.98736	0.982664	0.606527	0.949969	0.970034	0.939243	0.98471	0.602648	0.844665	0.88535	0.952218	0.439097	0.866881
MSTRG.138345	0.766439	0.838035	0.885691	0.989138	0.972567	0.965372	0.678757	0.836912	0.993772	0.965023	0.895542	0.984963	0.937915	0.860129	0.596749	0.982426	0.964019	0.596483	0.971011	0.857807	0.832193	0.772143	0.602327	0.373342	0.811257	0.977448	0.770506	0.957731	0.375467	0.90237	0.976921	0.592609	0.514957	0.560204	0.933315	0.109819	0.931712	0.993	0.65865	0.979989	0.998332	0.872624	0.99675	0.462881	0.869331	0.864596	0.964562	0.30469	0.84774
MSTRG.138346	0.818776	0.843933	0.884276	0.978154	0.994112	0.977692	0.692047	0.813375	0.985954	0.955579	0.919309	0.973531	0.923591	0.893079	0.64309	0.963015	0.961185	0.64324	0.931192	0.887876	0.879565	0.804461	0.644816	0.424132	0.784768	0.952102	0.803813	0.933038	0.476634	0.922135	0.975251	0.671235	0.593387	0.578082	0.976747	0.210794	0.982181	0.984309	0.628874	0.939257	0.975574	0.916552	0.987523	0.558264	0.85436	0.866625	0.937691	0.380126	0.833289
MSTRG.13956	0.920953	0.568341	0.770452	0.524454	0.658514	0.733266	0.76113	0.741146	0.60386	0.674908	0.519048	0.533872	0.779209	0.915947	0.92979	0.498222	0.461718	0.749089	0.409987	0.803621	0.915859	0.852638	0.883757	0.861402	0.824603	0.58604	0.927983	0.751946	0.841739	0.860856	0.508455	0.937967	0.740596	0.953012	0.673382	0.734008	0.736616	0.576793	0.802309	0.629832	0.577738	0.694932	0.646536	0.829586	0.785217	0.911686	0.708035	0.832143	0.855616
MSTRG.13960	0.827373	0.513142	0.68303	0.378851	0.516876	0.620862	0.76273	0.631912	0.471765	0.519447	0.447394	0.400421	0.70644	0.805396	0.961307	0.367196	0.286369	0.793001	0.253943	0.744304	0.845293	0.840063	0.926744	0.865275	0.711064	0.429976	0.870828	0.62842	0.905978	0.787875	0.347657	0.949356	0.801468	0.921486	0.557962	0.848572	0.612764	0.440712	0.666891	0.534246	0.433733	0.616365	0.506805	0.84443	0.653267	0.840287	0.617196	0.911259	0.827765
MSTRG.142011	0.684704	0.870256	0.807131	0.994462	0.9787	0.931401	0.573623	0.739864	0.988486	0.962866	0.913422	0.979294	0.882774	0.811266	0.530181	0.992859	0.969482	0.586508	0.970595	0.848018	0.793415	0.741184	0.547223	0.335933	0.710884	0.983453	0.67969	0.929864	0.338859	0.857127	0.977129	0.538929	0.503156	0.486546	0.94674	0.0706627	0.914013	0.988762	0.567534	0.947018	0.993448	0.891309	0.982995	0.456932	0.78503	0.796386	0.94096	0.261397	0.775362
MSTRG.15100	0.813697	0.879575	0.90465	0.977381	0.9873	0.988908	0.746926	0.817975	0.991903	0.940953	0.952389	0.980342	0.958129	0.887031	0.697659	0.971865	0.940478	0.708619	0.92789	0.915857	0.894304	0.85197	0.708446	0.436847	0.781241	0.942068	0.823708	0.937576	0.525447	0.947095	0.963794	0.709593	0.658978	0.589967	0.97993	0.26602	0.979033	0.988587	0.595011	0.969525	0.976274	0.935274	0.988048	0.584422	0.845338	0.889042	0.965125	0.432812	0.884649
MSTRG.151699	0.731214	0.788145	0.823455	0.982715	0.971265	0.930463	0.577163	0.778532	0.972098	0.951352	0.869013	0.9692	0.85669	0.822102	0.485451	0.964698	0.988752	0.498747	0.965031	0.799033	0.779561	0.682599	0.486371	0.299676	0.746286	0.963054	0.699022	0.90556	0.296959	0.836366	0.987715	0.514227	0.430258	0.469781	0.929576	0.0206208	0.929737	0.976088	0.614315	0.911149	0.977317	0.846469	0.974186	0.411395	0.825664	0.781717	0.894703	0.20416	0.733087
MSTRG.153062	0.742244	0.788447	0.88517	0.991532	0.954778	0.955916	0.678991	0.841046	0.986415	0.931092	0.892128	0.993402	0.913717	0.810965	0.522968	0.980776	0.985256	0.520373	0.989874	0.800045	0.777001	0.706947	0.528833	0.261358	0.790321	0.952598	0.740645	0.914866	0.296442	0.862145	0.992441	0.524316	0.448704	0.466082	0.911159	0.0199682	0.924721	0.991504	0.610944	0.967591	0.989847	0.829752	0.985356	0.371041	0.860889	0.81493	0.928375	0.20766	0.803128
MSTRG.153893	0.629693	0.459413	0.410316	0.226062	0.409657	0.436822	0.518026	0.282952	0.30193	0.327533	0.413976	0.234568	0.445011	0.608986	0.819161	0.214698	0.149403	0.768695	0.0495003	0.637946	0.708861	0.717589	0.805806	0.770072	0.333908	0.232603	0.634766	0.367967	0.944913	0.595417	0.203488	0.882353	0.847392	0.67953	0.51372	0.919048	0.524674	0.273798	0.288111	0.26751	0.233385	0.590639	0.311367	0.897618	0.323092	0.569675	0.379745	0.894043	0.544961
MSTRG.155787	0.738084	0.387552	0.582469	0.238008	0.372914	0.488947	0.678817	0.565713	0.336359	0.414531	0.279943	0.258204	0.604364	0.716152	0.897928	0.228534	0.140925	0.699377	0.127581	0.628737	0.740347	0.741206	0.855283	0.862041	0.67204	0.321693	0.789572	0.543345	0.831495	0.679136	0.201449	0.863667	0.693671	0.91807	0.400364	0.818172	0.45857	0.302478	0.679274	0.427054	0.310283	0.47102	0.380965	0.765357	0.585281	0.766546	0.515605	0.876685	0.752391
MSTRG.158671	0.716324	0.788978	0.85702	0.993821	0.958148	0.945326	0.64663	0.800052	0.982235	0.916233	0.908894	0.994014	0.883753	0.783724	0.487062	0.982021	0.995256	0.50696	0.988019	0.786858	0.756884	0.684461	0.497231	0.220368	0.737227	0.940445	0.705766	0.883797	0.284279	0.838524	0.999263	0.503032	0.446583	0.408875	0.922342	0.00257671	0.930617	0.989557	0.548066	0.943478	0.981004	0.836467	0.975539	0.363229	0.821639	0.77364	0.902616	0.17935	0.759748
MSTRG.159101	0.766647	0.402752	0.687242	0.394204	0.471693	0.5841	0.678988	0.732404	0.473649	0.569877	0.304262	0.40726	0.697961	0.772566	0.786318	0.379018	0.322684	0.557859	0.343267	0.622161	0.729681	0.686882	0.734068	0.75571	0.84092	0.501056	0.808084	0.691588	0.599161	0.716459	0.365781	0.724782	0.493187	0.90971	0.437151	0.533793	0.507357	0.446754	0.866758	0.57977	0.481111	0.461254	0.529337	0.579717	0.755628	0.831639	0.633531	0.662952	0.798511
MSTRG.159832	0.723223	0.78237	0.647089	0.532121	0.660848	0.693527	0.690583	0.514388	0.611764	0.629954	0.678699	0.538032	0.764896	0.799026	0.9819	0.549957	0.399058	0.97578	0.384348	0.897243	0.897447	0.962492	0.993087	0.858	0.569979	0.570233	0.789281	0.707967	0.96013	0.850556	0.465827	0.972183	0.966735	0.846481	0.732461	0.870845	0.695479	0.579671	0.476947	0.646331	0.566531	0.825136	0.616753	0.950091	0.549805	0.836438	0.748133	0.94767	0.861703
MSTRG.160256	0.697933	0.763618	0.834086	0.986946	0.94948	0.927824	0.610509	0.782219	0.969999	0.906856	0.890792	0.984484	0.853659	0.763957	0.441685	0.971722	0.998984	0.463348	0.984971	0.757769	0.729853	0.645611	0.449947	0.18745	0.717483	0.932093	0.676813	0.863578	0.244316	0.809749	0.998014	0.465364	0.404842	0.374555	0.910206	-0.0396829	0.920151	0.979122	0.536266	0.919372	0.970576	0.816106	0.963548	0.331395	0.807214	0.7421	0.876042	0.134879	0.718911
MSTRG.160514	0.758331	0.752249	0.844782	0.962759	0.954462	0.93665	0.645443	0.778967	0.952335	0.888077	0.895736	0.963061	0.847391	0.798074	0.499269	0.939336	0.980507	0.505298	0.936651	0.779576	0.774908	0.677665	0.501041	0.244155	0.714102	0.896603	0.724352	0.840212	0.343821	0.831272	0.98251	0.546496	0.475367	0.409754	0.933147	0.064669	0.957246	0.960029	0.529874	0.882378	0.939656	0.840367	0.94714	0.415821	0.807545	0.755832	0.849793	0.216016	0.720376
MSTRG.160670	0.913056	0.675687	0.954664	0.788029	0.811682	0.909897	0.879219	0.943035	0.837808	0.829471	0.714365	0.810609	0.959932	0.918293	0.812377	0.772534	0.74033	0.660997	0.752912	0.829233	0.890089	0.836049	0.785997	0.580708	0.957555	0.799104	0.948526	0.905926	0.579672	0.936884	0.776859	0.776689	0.603596	0.79606	0.779686	0.384492	0.848005	0.825909	0.826016	0.902451	0.832019	0.746959	0.86612	0.569675	0.948694	0.971606	0.899045	0.550611	0.965775
MSTRG.162706	0.861873	0.90541	0.886078	0.891279	0.949915	0.959957	0.773607	0.790173	0.932414	0.923451	0.902408	0.891487	0.966774	0.949189	0.859663	0.890986	0.818002	0.849313	0.803669	0.983978	0.977015	0.95863	0.865069	0.658643	0.799416	0.897976	0.887638	0.950877	0.717706	0.992931	0.85716	0.862312	0.801046	0.770482	0.961654	0.501591	0.949741	0.916913	0.657753	0.929995	0.910717	0.962384	0.93781	0.767962	0.830447	0.959257	0.970192	0.658269	0.952209
MSTRG.163419	0.725416	0.496567	0.54549	0.456298	0.602402	0.602588	0.546365	0.432669	0.49719	0.489298	0.566117	0.461427	0.526459	0.683727	0.681872	0.421467	0.446644	0.632733	0.312295	0.657236	0.737371	0.663128	0.661148	0.572621	0.432699	0.412899	0.676316	0.46798	0.770078	0.653492	0.474842	0.787866	0.71581	0.548667	0.676979	0.649666	0.718769	0.484858	0.342277	0.398675	0.434408	0.67274	0.502976	0.760119	0.478237	0.59177	0.463216	0.653162	0.528236
MSTRG.164195	0.852523	0.902325	0.870028	0.853144	0.920413	0.940252	0.796265	0.754493	0.899488	0.873146	0.907446	0.85933	0.951882	0.925538	0.893152	0.856166	0.771265	0.891455	0.752949	0.984008	0.975635	0.976043	0.90354	0.66742	0.754946	0.844549	0.887609	0.907146	0.778428	0.98586	0.816774	0.898861	0.860944	0.75906	0.950228	0.57482	0.937806	0.882936	0.592124	0.900199	0.867048	0.962882	0.899678	0.80563	0.786391	0.94259	0.942884	0.711124	0.950662
MSTRG.168039	0.710694	0.858551	0.660813	0.616155	0.732135	0.736519	0.647523	0.534587	0.688055	0.725288	0.725717	0.610306	0.805077	0.833251	0.956714	0.638615	0.479339	0.977711	0.478607	0.941721	0.917829	0.980274	0.972884	0.861775	0.600286	0.676405	0.774386	0.792078	0.903621	0.880993	0.540803	0.938682	0.937448	0.860138	0.787186	0.793535	0.72609	0.655968	0.526246	0.717684	0.656059	0.87723	0.693318	0.936091	0.584524	0.867034	0.823527	0.902952	0.884098
MSTRG.169485	0.492632	0.442427	0.319108	0.0864011	0.255063	0.312773	0.49391	0.195461	0.18185	0.217805	0.306706	0.100324	0.409117	0.506639	0.864071	0.103885	-0.0490355	0.82619	-0.0811939	0.595951	0.632406	0.726318	0.865698	0.829094	0.27462	0.132073	0.562332	0.317994	0.959214	0.534186	0.0234237	0.861086	0.870646	0.725311	0.361044	0.996716	0.338841	0.144559	0.244673	0.229732	0.122406	0.495664	0.190584	0.88564	0.216832	0.54405	0.355381	0.976294	0.575608
MSTRG.170141	0.773524	0.846812	0.749872	0.660373	0.759412	0.79719	0.757532	0.624433	0.731229	0.7301	0.773968	0.668887	0.863298	0.853831	0.975039	0.67768	0.53556	0.969295	0.534315	0.946209	0.937062	0.991873	0.98863	0.800523	0.661247	0.685211	0.841717	0.804515	0.90073	0.919975	0.598313	0.95671	0.943168	0.836774	0.813145	0.770672	0.78227	0.703708	0.535486	0.771247	0.692773	0.882653	0.734395	0.898749	0.653261	0.901324	0.849328	0.877556	0.932428
MSTRG.170340	0.893865	0.294788	0.851548	0.462101	0.504637	0.688181	0.899714	0.889154	0.527601	0.50901	0.399076	0.512141	0.751921	0.759621	0.743178	0.422512	0.451335	0.454968	0.434416	0.55734	0.715596	0.62759	0.681535	0.507285	0.901931	0.446997	0.917772	0.619234	0.55524	0.738541	0.488787	0.717652	0.46124	0.733922	0.479082	0.437321	0.639757	0.5178	0.78702	0.618101	0.508162	0.431443	0.57277	0.442812	0.859329	0.817087	0.593437	0.526672	0.80313
MSTRG.171554	0.837936	0.822962	0.78716	0.703127	0.810819	0.84313	0.785085	0.651715	0.763798	0.738618	0.822346	0.715002	0.85827	0.876693	0.944537	0.703708	0.613812	0.929861	0.569653	0.94098	0.955761	0.968681	0.950995	0.736622	0.660134	0.687826	0.872624	0.781815	0.904199	0.929833	0.668212	0.967707	0.939315	0.774113	0.873077	0.745891	0.869259	0.742643	0.506211	0.7585	0.712951	0.910144	0.763931	0.895428	0.68115	0.884605	0.822672	0.832667	0.893567
MSTRG.171849	0.784573	0.887034	0.898348	0.982555	0.979889	0.981346	0.731978	0.819285	0.996027	0.949136	0.944082	0.984075	0.963448	0.873258	0.680593	0.982193	0.93896	0.697228	0.943759	0.908992	0.876017	0.843487	0.69442	0.424514	0.786706	0.957347	0.803903	0.952048	0.486226	0.939336	0.962195	0.67761	0.631383	0.587193	0.963805	0.228238	0.95458	0.992414	0.605704	0.987595	0.987427	0.922473	0.992437	0.551929	0.845185	0.888569	0.980658	0.4074	0.89146
MSTRG.174271	0.888451	0.824712	0.859558	0.784962	0.867779	0.895821	0.762084	0.800103	0.843475	0.888009	0.763593	0.782413	0.936102	0.973658	0.910202	0.780422	0.701883	0.836889	0.692702	0.954296	0.981485	0.953017	0.89682	0.787715	0.857323	0.841356	0.916149	0.943487	0.756601	0.97585	0.74512	0.896406	0.775916	0.902687	0.867775	0.580111	0.869741	0.820513	0.784278	0.867354	0.831017	0.885268	0.867503	0.804456	0.849996	0.989519	0.930717	0.740331	0.962848
MSTRG.179875	0.739336	0.792651	0.87954	0.993432	0.959593	0.957945	0.682371	0.821506	0.986031	0.916033	0.915145	0.997238	0.903848	0.798925	0.519299	0.981867	0.990912	0.529189	0.985535	0.800316	0.775244	0.706569	0.528459	0.239326	0.758363	0.937854	0.73432	0.891982	0.312976	0.857748	0.998166	0.531661	0.471252	0.432681	0.925951	0.0329236	0.939762	0.992536	0.561621	0.955566	0.982562	0.842586	0.980135	0.381012	0.838828	0.796181	0.913972	0.208694	0.78735
MSTRG.180236	0.92328	0.623047	0.968418	0.777974	0.793071	0.905576	0.898872	0.967423	0.824645	0.80391	0.693862	0.806299	0.948641	0.901516	0.77989	0.756316	0.745263	0.606618	0.752986	0.78846	0.864007	0.795481	0.747994	0.526537	0.970215	0.774123	0.952865	0.879469	0.540764	0.917312	0.778573	0.747998	0.558126	0.760436	0.756121	0.341542	0.844945	0.815998	0.826916	0.889317	0.818042	0.707661	0.854293	0.516184	0.964341	0.953919	0.870736	0.501996	0.946352
MSTRG.183229	0.86323	0.581103	0.98016	0.860175	0.822768	0.929132	0.876819	0.978266	0.875962	0.791993	0.757655	0.89543	0.921902	0.81048	0.59339	0.831653	0.872036	0.449854	0.873179	0.699411	0.760013	0.667144	0.569711	0.251788	0.916915	0.791639	0.873764	0.829119	0.339672	0.852679	0.888319	0.580708	0.415183	0.522759	0.774265	0.092803	0.879691	0.88237	0.705603	0.911298	0.868972	0.673341	0.891081	0.311872	0.95515	0.850782	0.838587	0.249936	0.851351
MSTRG.183270	0.897197	0.515032	0.948015	0.70257	0.705109	0.846388	0.905513	0.96908	0.750289	0.720761	0.606747	0.739943	0.900961	0.840997	0.732708	0.67719	0.679821	0.522603	0.694373	0.698066	0.792725	0.719537	0.69332	0.46521	0.966627	0.691043	0.930804	0.809959	0.481026	0.85467	0.712046	0.691428	0.480206	0.720289	0.660327	0.298518	0.774127	0.743775	0.821165	0.834447	0.74556	0.603228	0.783948	0.42845	0.950163	0.907563	0.799293	0.448243	0.906269
MSTRG.183281	0.883621	0.742326	0.953253	0.909616	0.914161	0.962181	0.793197	0.94021	0.936272	0.930234	0.795092	0.917459	0.968001	0.927078	0.703537	0.891344	0.884042	0.601535	0.888201	0.846759	0.880564	0.800226	0.683878	0.488884	0.941509	0.916925	0.892453	0.962792	0.460519	0.938191	0.904987	0.686475	0.527651	0.709269	0.866995	0.221476	0.913859	0.930518	0.813575	0.95835	0.940347	0.807859	0.9586	0.506121	0.963985	0.947188	0.946769	0.41174	0.919658
MSTRG.186227	0.734442	0.765908	0.613097	0.530538	0.67557	0.673545	0.58295	0.523012	0.609393	0.704498	0.593771	0.515269	0.740971	0.854556	0.947395	0.540381	0.405284	0.915793	0.386461	0.895121	0.909452	0.934139	0.941727	0.951317	0.630982	0.633543	0.773973	0.771293	0.903256	0.84208	0.461541	0.937622	0.871663	0.943662	0.717646	0.818417	0.671598	0.573113	0.635373	0.630092	0.586271	0.807458	0.632456	0.954146	0.594096	0.861297	0.758772	0.926934	0.835544
MSTRG.186682	0.547753	0.729476	0.769862	0.942064	0.854556	0.845296	0.546893	0.741901	0.920938	0.853998	0.819153	0.941119	0.819564	0.646263	0.346128	0.946162	0.932972	0.387191	0.981455	0.671549	0.605041	0.565666	0.367215	0.0881081	0.679472	0.906471	0.56513	0.837219	0.0850018	0.724923	0.932781	0.316509	0.285156	0.302664	0.791569	-0.17906	0.779215	0.930653	0.501652	0.925764	0.94143	0.710285	0.911771	0.172815	0.749118	0.679678	0.864472	0.0198212	0.695206
MSTRG.187034	0.919061	0.305596	0.885157	0.564295	0.591209	0.744443	0.848619	0.949279	0.611946	0.612163	0.426286	0.602433	0.771366	0.802192	0.648874	0.513134	0.585145	0.357668	0.557332	0.556295	0.717706	0.579589	0.578959	0.444393	0.962032	0.55759	0.909956	0.689701	0.428802	0.749197	0.605681	0.637956	0.34487	0.703279	0.536867	0.271082	0.701966	0.607668	0.871129	0.670655	0.607366	0.452709	0.662378	0.363909	0.93711	0.826438	0.63498	0.390478	0.776013
MSTRG.187548	0.688233	0.892557	0.826556	0.866854	0.862404	0.886616	0.719928	0.744403	0.900327	0.867711	0.864712	0.871625	0.943133	0.809648	0.751768	0.890798	0.769115	0.780224	0.82587	0.899666	0.839316	0.879847	0.777927	0.515313	0.741143	0.8787	0.761357	0.921514	0.541532	0.907387	0.810073	0.696555	0.688257	0.657041	0.853341	0.338837	0.813128	0.887206	0.577733	0.957806	0.896763	0.866674	0.8967	0.586701	0.758814	0.88562	0.970725	0.519942	0.932996
MSTRG.188433	0.868963	0.885345	0.920693	0.924094	0.962776	0.984669	0.806729	0.828036	0.957525	0.921253	0.928057	0.931159	0.980172	0.933441	0.818083	0.920116	0.866215	0.801981	0.851666	0.95948	0.955347	0.92743	0.823689	0.569367	0.812806	0.904396	0.892028	0.943429	0.661403	0.988721	0.901462	0.82351	0.760373	0.706561	0.96924	0.427494	0.973329	0.947278	0.638651	0.953857	0.934596	0.949391	0.959532	0.698609	0.855669	0.946705	0.970419	0.583833	0.946186
MSTRG.188750	0.882257	0.734762	0.963128	0.937949	0.933418	0.978737	0.797854	0.942645	0.955726	0.926261	0.828693	0.948725	0.961901	0.909394	0.660768	0.915499	0.928316	0.568565	0.921126	0.830458	0.863668	0.772674	0.643212	0.413241	0.920816	0.918623	0.881151	0.94328	0.426467	0.92791	0.944605	0.657958	0.508041	0.638253	0.888904	0.170715	0.943553	0.954686	0.766116	0.96072	0.955107	0.812866	0.97255	0.467542	0.961008	0.919003	0.934295	0.353296	0.891551
MSTRG.189167	0.878047	0.882706	0.886436	0.85072	0.918573	0.94266	0.794851	0.796264	0.900367	0.900392	0.865872	0.853621	0.965186	0.957375	0.898626	0.850381	0.770116	0.866698	0.758327	0.981484	0.986277	0.972125	0.899384	0.706819	0.817085	0.867153	0.910245	0.94258	0.75668	0.99578	0.813765	0.894409	0.819672	0.818075	0.931989	0.556143	0.926834	0.882033	0.685977	0.911798	0.87786	0.941886	0.910333	0.794631	0.834629	0.975737	0.958497	0.708853	0.970016
MSTRG.190932	0.774631	0.920847	0.868052	0.969721	0.983218	0.96762	0.693777	0.784172	0.988039	0.966241	0.935195	0.963135	0.95653	0.891096	0.711761	0.973396	0.912433	0.741899	0.91783	0.939556	0.898786	0.87459	0.727146	0.500448	0.772827	0.968898	0.795049	0.96976	0.529263	0.947682	0.938116	0.707235	0.667052	0.639478	0.970903	0.282443	0.942495	0.980023	0.621042	0.976958	0.981598	0.947139	0.986446	0.613734	0.823815	0.901141	0.991615	0.465554	0.897119
MSTRG.193290	0.870869	0.697324	0.840387	0.633879	0.714961	0.806559	0.838272	0.791367	0.709816	0.732597	0.648362	0.652226	0.892381	0.899252	0.951775	0.632209	0.53796	0.824183	0.545947	0.867136	0.920956	0.920738	0.932708	0.785366	0.845638	0.677912	0.929198	0.833953	0.797425	0.919962	0.593836	0.913198	0.782452	0.911019	0.724466	0.667394	0.7584	0.684579	0.752157	0.78567	0.689086	0.757837	0.737316	0.774024	0.809003	0.959593	0.837594	0.797622	0.966091
MSTRG.193291	0.66325	0.520285	0.491122	0.243777	0.408415	0.472714	0.600481	0.403362	0.341234	0.408129	0.380754	0.25323	0.569249	0.688336	0.941383	0.249736	0.118809	0.848206	0.0890933	0.708912	0.770268	0.817826	0.925466	0.916491	0.502645	0.316881	0.719666	0.512452	0.961314	0.682788	0.186785	0.930841	0.861108	0.879786	0.480456	0.954826	0.479875	0.303401	0.493205	0.39442	0.297012	0.58917	0.366019	0.916088	0.438609	0.719609	0.516542	0.987106	0.720379
MSTRG.195237	0.802143	0.60509	0.687132	0.43151	0.563095	0.651535	0.757139	0.615521	0.523064	0.564593	0.518382	0.449141	0.744299	0.814541	0.984941	0.431197	0.320459	0.860632	0.30295	0.801809	0.870561	0.892376	0.964357	0.878626	0.69193	0.485237	0.859894	0.67279	0.925075	0.82105	0.385425	0.963853	0.855749	0.922682	0.609569	0.859205	0.635628	0.490657	0.634094	0.589053	0.485572	0.681901	0.550506	0.877881	0.639352	0.86049	0.677638	0.933649	0.864219
MSTRG.202190	0.520715	0.464062	0.334942	0.116874	0.292358	0.339589	0.492369	0.210122	0.210587	0.2536	0.329492	0.127083	0.423673	0.539388	0.871542	0.130683	-0.0132234	0.834682	-0.0556541	0.621101	0.660797	0.741856	0.870868	0.847444	0.291838	0.164841	0.579991	0.344259	0.97109	0.556689	0.0568762	0.878274	0.879877	0.741841	0.397632	0.998595	0.375055	0.173408	0.268294	0.244465	0.151072	0.527184	0.220526	0.909593	0.239546	0.562697	0.374401	0.98195	0.581997
MSTRG.202922	0.631054	0.961506	0.732004	0.838885	0.866061	0.844074	0.615611	0.619334	0.874851	0.87048	0.873751	0.82809	0.893364	0.801827	0.775601	0.871352	0.720612	0.86198	0.766168	0.943142	0.856232	0.917801	0.812552	0.607857	0.638318	0.875097	0.700291	0.908651	0.620718	0.893706	0.764391	0.733569	0.769424	0.681058	0.877961	0.435592	0.7931	0.855874	0.51031	0.906436	0.867361	0.923096	0.866126	0.700505	0.658596	0.855712	0.95788	0.607112	0.894325
MSTRG.203360	0.826114	0.812678	0.836021	0.924183	0.970665	0.941457	0.658445	0.750522	0.934042	0.910383	0.893695	0.916944	0.864433	0.885336	0.651113	0.901813	0.915625	0.65281	0.852835	0.87552	0.882732	0.794788	0.648561	0.458621	0.725007	0.892023	0.792063	0.872882	0.541885	0.896058	0.929096	0.707873	0.630841	0.573708	0.972078	0.288292	0.980889	0.931288	0.581963	0.857054	0.912385	0.915526	0.935308	0.621398	0.801223	0.828525	0.871263	0.429255	0.777358
MSTRG.204289	0.766896	0.927254	0.737561	0.765345	0.86625	0.844461	0.6553	0.612778	0.819885	0.84899	0.834568	0.752887	0.870656	0.899593	0.90935	0.778832	0.655174	0.945852	0.639058	0.992403	0.96311	0.987646	0.924947	0.796714	0.659486	0.810106	0.803998	0.881655	0.835522	0.938901	0.704298	0.912105	0.899245	0.822206	0.906678	0.672002	0.847943	0.794213	0.569591	0.813483	0.792567	0.961576	0.822733	0.902172	0.67328	0.904152	0.903782	0.805195	0.899265
MSTRG.204297	0.757186	0.836233	0.771594	0.708498	0.77621	0.808027	0.709651	0.700401	0.772974	0.813404	0.721911	0.706778	0.894012	0.876373	0.904019	0.726299	0.587753	0.87215	0.621431	0.923453	0.910159	0.945142	0.90886	0.784048	0.764902	0.780328	0.825532	0.894906	0.743968	0.917065	0.640853	0.853242	0.790999	0.875867	0.783098	0.602761	0.749203	0.745803	0.690857	0.837946	0.764548	0.838351	0.78944	0.783582	0.739182	0.936831	0.908403	0.762306	0.951838
MSTRG.204312	0.78178	0.869944	0.723809	0.693019	0.806452	0.801735	0.658365	0.621765	0.759091	0.816565	0.745381	0.681119	0.852122	0.908053	0.942327	0.704421	0.575991	0.936819	0.565509	0.967966	0.960645	0.982002	0.946562	0.869284	0.69554	0.765243	0.823388	0.87021	0.859186	0.925689	0.628615	0.932338	0.883737	0.899659	0.840131	0.721967	0.792733	0.729004	0.642494	0.773773	0.736739	0.90562	0.773085	0.917717	0.684348	0.921147	0.875487	0.8556	0.908548
MSTRG.204325	0.923158	0.793912	0.95172	0.897276	0.934695	0.975608	0.815743	0.911246	0.934292	0.934396	0.828111	0.903551	0.980515	0.970626	0.798987	0.880473	0.856727	0.709036	0.843591	0.912979	0.948707	0.879945	0.781666	0.595214	0.921951	0.90705	0.932666	0.96812	0.598965	0.981399	0.885767	0.795166	0.651716	0.776827	0.911179	0.37006	0.94782	0.923629	0.79557	0.944822	0.926068	0.873062	0.954803	0.640511	0.943661	0.980438	0.957386	0.54445	0.951136
MSTRG.205378	0.884494	0.742455	0.961144	0.925704	0.925534	0.973155	0.800134	0.943219	0.948345	0.92936	0.815808	0.93543	0.968807	0.919866	0.686876	0.90585	0.906909	0.590441	0.906213	0.842236	0.874997	0.791051	0.668793	0.452974	0.932439	0.919084	0.889716	0.955162	0.44776	0.936493	0.926102	0.676169	0.523248	0.675779	0.88033	0.200203	0.930717	0.944838	0.789059	0.963077	0.949694	0.813556	0.967603	0.489957	0.96363	0.93621	0.94399	0.386739	0.910272
MSTRG.205387	0.870626	0.740791	0.968311	0.937975	0.92607	0.97928	0.815499	0.943026	0.956372	0.914627	0.839786	0.952463	0.970173	0.895211	0.665667	0.91929	0.923068	0.578935	0.924214	0.829641	0.856295	0.777764	0.652277	0.396082	0.913993	0.911353	0.879282	0.937913	0.42631	0.928262	0.941884	0.655944	0.518413	0.62426	0.883881	0.171501	0.937231	0.955694	0.743463	0.971207	0.954292	0.810825	0.970224	0.457406	0.953812	0.917154	0.939333	0.353005	0.902793
MSTRG.20578	0.674084	0.842331	0.793419	0.990502	0.973314	0.923213	0.565446	0.716145	0.97745	0.930473	0.924659	0.978435	0.850782	0.778952	0.487565	0.983885	0.981494	0.552233	0.965505	0.816954	0.766001	0.703814	0.505696	0.268866	0.666257	0.952663	0.657218	0.881724	0.320423	0.828674	0.985234	0.514931	0.4895	0.412503	0.949411	0.044707	0.925431	0.981737	0.501179	0.915701	0.974894	0.880987	0.966599	0.429594	0.756592	0.749614	0.899237	0.218063	0.726883
MSTRG.206226	0.530727	0.43637	0.325235	0.106803	0.289631	0.332447	0.480478	0.199816	0.197591	0.239264	0.320039	0.116699	0.398605	0.535183	0.851135	0.11401	-0.010161	0.808684	-0.0699627	0.602831	0.653797	0.718402	0.84627	0.831146	0.276872	0.145907	0.575693	0.31836	0.969347	0.541302	0.056402	0.873866	0.867282	0.71952	0.398169	0.994286	0.384637	0.162028	0.254789	0.213791	0.134337	0.518584	0.207872	0.907315	0.231988	0.540998	0.342847	0.966971	0.548362
MSTRG.209696	0.735405	0.907622	0.854597	0.949959	0.948361	0.941447	0.681777	0.784356	0.969941	0.953901	0.900161	0.943927	0.954203	0.864041	0.69572	0.960204	0.882373	0.722413	0.912348	0.915973	0.86612	0.856979	0.713048	0.490172	0.78075	0.963441	0.771356	0.972587	0.48417	0.927801	0.909568	0.668181	0.628534	0.64303	0.925158	0.247503	0.891114	0.960899	0.637586	0.984528	0.972134	0.908295	0.970273	0.568327	0.818673	0.89672	0.995675	0.442739	0.904718
MSTRG.210344	0.826081	0.809583	0.752159	0.750668	0.852948	0.827546	0.592122	0.710633	0.802958	0.909919	0.684175	0.724806	0.850164	0.962034	0.833993	0.743059	0.673518	0.778759	0.652636	0.925869	0.947654	0.895531	0.814829	0.837295	0.807507	0.856803	0.8262	0.939605	0.698744	0.915082	0.705844	0.832321	0.696667	0.918963	0.840491	0.534327	0.81505	0.7769	0.820204	0.795333	0.805123	0.863559	0.834996	0.808992	0.796419	0.938512	0.889404	0.705829	0.869313
MSTRG.21322	0.53254	0.525913	0.353581	0.167715	0.34276	0.374082	0.477755	0.234178	0.261664	0.327232	0.356474	0.169473	0.464966	0.586259	0.891805	0.18524	0.0281293	0.86498	-0.0036629	0.671794	0.699334	0.78116	0.892441	0.898047	0.332853	0.240693	0.593505	0.417646	0.969156	0.596619	0.0976419	0.889312	0.886502	0.796889	0.437858	0.988204	0.398397	0.222077	0.331376	0.298108	0.211182	0.572915	0.274662	0.935828	0.276144	0.609899	0.438605	0.995759	0.622198
MSTRG.21600	0.816801	0.856986	0.89917	0.982654	0.992124	0.986086	0.721556	0.823019	0.99255	0.949988	0.93597	0.982357	0.942492	0.888444	0.661603	0.971615	0.958314	0.664866	0.937755	0.896651	0.882521	0.821235	0.667321	0.417914	0.788191	0.950131	0.81353	0.936389	0.487736	0.933028	0.976033	0.681236	0.614389	0.57668	0.977379	0.22254	0.982077	0.990801	0.61512	0.958368	0.98041	0.921481	0.991555	0.557718	0.855971	0.876619	0.952018	0.392092	0.857571
MSTRG.22204	0.851048	0.876743	0.875282	0.894474	0.950426	0.95867	0.778089	0.757024	0.925258	0.875286	0.939829	0.901369	0.929236	0.902701	0.807635	0.887763	0.843335	0.81517	0.802899	0.948424	0.944194	0.915828	0.817186	0.554175	0.728793	0.853275	0.861924	0.879554	0.70545	0.960276	0.87819	0.839222	0.801919	0.653915	0.978686	0.475396	0.979492	0.916073	0.541963	0.892479	0.889162	0.960806	0.920154	0.73679	0.787125	0.893624	0.91515	0.603236	0.889649
MSTRG.2320	0.813768	0.791561	0.851806	0.89718	0.92228	0.912074	0.633778	0.84197	0.921482	0.977253	0.756479	0.880166	0.913931	0.930548	0.672245	0.884758	0.858457	0.612073	0.863111	0.86703	0.876379	0.79637	0.655531	0.578895	0.886693	0.960801	0.80978	0.991251	0.445639	0.909118	0.874191	0.657215	0.508203	0.754913	0.868975	0.219929	0.869219	0.909916	0.838137	0.921572	0.939424	0.831846	0.94805	0.557856	0.902712	0.924031	0.949276	0.428043	0.867653
MSTRG.23365	0.868695	0.523427	0.773737	0.572126	0.658741	0.723978	0.676108	0.813066	0.637466	0.749984	0.440845	0.569842	0.784591	0.903702	0.788708	0.544983	0.524252	0.581186	0.513222	0.734591	0.84011	0.748033	0.732882	0.779765	0.91997	0.680556	0.870975	0.827733	0.598871	0.819404	0.555118	0.761464	0.509613	0.941314	0.614396	0.47552	0.677057	0.6137	0.954678	0.687725	0.648417	0.609677	0.693993	0.636409	0.865649	0.911478	0.747263	0.632752	0.836021
MSTRG.23998	0.832453	0.786723	0.811867	0.657463	0.746805	0.817937	0.829646	0.71271	0.731506	0.725522	0.741862	0.675292	0.892571	0.877246	0.982648	0.666421	0.545309	0.922	0.546737	0.920269	0.940368	0.974993	0.983443	0.78288	0.746724	0.676918	0.900183	0.814657	0.875484	0.934041	0.607286	0.956682	0.897216	0.861799	0.786407	0.741754	0.789964	0.705843	0.614304	0.789693	0.695913	0.838357	0.742813	0.850294	0.729462	0.935428	0.850295	0.853558	0.963861
MSTRG.25501	0.795231	0.910101	0.791445	0.861446	0.932773	0.89677	0.618478	0.719278	0.900671	0.96016	0.820578	0.838698	0.907413	0.946661	0.807708	0.864007	0.780771	0.812931	0.773581	0.971248	0.951457	0.923735	0.809305	0.733841	0.776947	0.931337	0.808015	0.97651	0.660506	0.94844	0.812676	0.803967	0.727799	0.822351	0.926084	0.461248	0.88037	0.879973	0.72531	0.88806	0.898875	0.941607	0.915855	0.773348	0.793045	0.9363	0.960541	0.641934	0.896788
MSTRG.25504	0.862929	0.75304	0.741781	0.683057	0.816116	0.814529	0.685064	0.63198	0.735736	0.756346	0.749387	0.680193	0.786164	0.900301	0.87129	0.664141	0.628353	0.830807	0.543421	0.898119	0.945056	0.895693	0.858325	0.754427	0.662738	0.689269	0.848489	0.76523	0.857605	0.888293	0.667644	0.930109	0.846721	0.780917	0.866234	0.695226	0.875309	0.715755	0.57407	0.681252	0.691169	0.880556	0.747709	0.88852	0.690658	0.849231	0.760117	0.779362	0.799087
MSTRG.26189	0.897089	0.764663	0.898643	0.843942	0.892959	0.921212	0.741292	0.883608	0.886271	0.935874	0.737903	0.839268	0.942663	0.973435	0.790005	0.827735	0.795618	0.684161	0.790879	0.892401	0.933288	0.858692	0.76463	0.67033	0.933287	0.900731	0.903577	0.976531	0.579278	0.952111	0.822967	0.774418	0.603512	0.845093	0.855471	0.372988	0.88157	0.87065	0.871698	0.90507	0.891336	0.830333	0.917894	0.647438	0.933263	0.979402	0.939116	0.560875	0.930553
MSTRG.26218	0.867843	0.784787	0.804182	0.770117	0.870881	0.878433	0.740639	0.684819	0.810936	0.78535	0.839436	0.775642	0.836451	0.890166	0.832421	0.752137	0.727191	0.809408	0.649228	0.904408	0.937085	0.889302	0.828147	0.633976	0.676217	0.736511	0.857737	0.785807	0.79529	0.910627	0.763349	0.891291	0.82898	0.691038	0.917732	0.599379	0.934373	0.797962	0.527614	0.755668	0.763661	0.909413	0.81303	0.814009	0.725938	0.849892	0.802705	0.689612	0.819362
MSTRG.27846	0.820693	0.932663	0.841586	0.876357	0.940968	0.933433	0.721074	0.740063	0.918766	0.926345	0.892559	0.869326	0.947416	0.937266	0.860559	0.882605	0.789995	0.873898	0.782529	0.994491	0.971344	0.967415	0.871312	0.694176	0.763303	0.90172	0.851062	0.953059	0.726531	0.980486	0.830493	0.858121	0.814634	0.784408	0.955151	0.520863	0.92072	0.900332	0.642684	0.91631	0.90036	0.971819	0.923194	0.794512	0.789734	0.947366	0.971566	0.681373	0.940633
MSTRG.27938	0.919756	0.546631	0.944601	0.784036	0.793815	0.88522	0.813294	0.982254	0.817489	0.827649	0.625755	0.801929	0.897675	0.898002	0.663994	0.747388	0.786289	0.464071	0.777772	0.72041	0.816754	0.694084	0.616389	0.470453	0.995988	0.79637	0.91321	0.877299	0.409653	0.866153	0.802791	0.647666	0.405568	0.726043	0.729734	0.197478	0.833776	0.812999	0.90015	0.854773	0.825202	0.649623	0.857404	0.420171	0.995676	0.914877	0.830397	0.371101	0.864689
MSTRG.28577	0.787644	0.848983	0.73008	0.660019	0.776988	0.795439	0.722635	0.599735	0.72894	0.741269	0.773853	0.662175	0.840443	0.871164	0.97068	0.671474	0.543842	0.969877	0.520907	0.955125	0.95292	0.990448	0.980672	0.826943	0.642683	0.688422	0.837293	0.798905	0.923916	0.917925	0.603029	0.972437	0.952943	0.843285	0.835995	0.79157	0.802877	0.701036	0.534811	0.742492	0.687683	0.902906	0.733317	0.937329	0.64201	0.891716	0.832318	0.891421	0.902378
MSTRG.28597	0.822577	0.862744	0.76061	0.718988	0.834633	0.839784	0.721334	0.632062	0.779372	0.789703	0.813487	0.717904	0.857105	0.902557	0.942622	0.722414	0.621664	0.94246	0.582097	0.968878	0.972344	0.982851	0.949066	0.796217	0.666042	0.737656	0.852267	0.826829	0.896138	0.937322	0.673587	0.962081	0.929615	0.82193	0.88838	0.739501	0.86222	0.754891	0.554603	0.767907	0.738451	0.934993	0.783763	0.924551	0.681171	0.900321	0.851369	0.844575	0.893367
MSTRG.28598	0.762718	0.874731	0.72774	0.678571	0.784263	0.797329	0.702944	0.6053	0.746647	0.769435	0.774104	0.676771	0.856157	0.871231	0.961135	0.696069	0.553044	0.969618	0.549115	0.963871	0.947052	0.994482	0.974585	0.831303	0.657186	0.723726	0.821552	0.832624	0.888606	0.921724	0.612085	0.946629	0.931008	0.856466	0.832783	0.755571	0.786317	0.717681	0.560802	0.773489	0.714339	0.904988	0.751984	0.916687	0.650111	0.903959	0.864601	0.873481	0.919434
MSTRG.32351	0.774774	0.857157	0.75609	0.706444	0.795356	0.810812	0.690237	0.672536	0.772453	0.823666	0.734158	0.699615	0.882742	0.899671	0.928632	0.721473	0.586065	0.906573	0.60109	0.950718	0.940518	0.968948	0.932611	0.832842	0.743925	0.781827	0.831618	0.894019	0.799619	0.928486	0.639248	0.894647	0.835501	0.898848	0.812935	0.659705	0.772545	0.743512	0.682155	0.816372	0.758718	0.873513	0.788744	0.849579	0.723151	0.939549	0.902218	0.810484	0.941164
MSTRG.32352	0.798168	0.746404	0.680779	0.543464	0.686562	0.717373	0.69552	0.57408	0.623831	0.671346	0.644678	0.544843	0.773734	0.862487	0.985328	0.546941	0.430008	0.934307	0.395254	0.898964	0.9322	0.953425	0.978658	0.902153	0.647154	0.597975	0.839087	0.741755	0.955823	0.871639	0.490306	0.989063	0.924897	0.908023	0.74417	0.858931	0.729396	0.591596	0.589821	0.643149	0.583873	0.819359	0.641201	0.959801	0.62309	0.874135	0.749943	0.943894	0.86381
MSTRG.34321	0.886419	0.828446	0.956693	0.936158	0.953896	0.992848	0.823716	0.898381	0.965533	0.933267	0.887993	0.946238	0.992372	0.935932	0.769625	0.925663	0.894333	0.713972	0.889828	0.915179	0.927605	0.876438	0.764811	0.516786	0.883191	0.920579	0.905115	0.960963	0.567613	0.977993	0.923389	0.763993	0.659057	0.69981	0.935737	0.324789	0.962851	0.958429	0.716428	0.975654	0.953739	0.894007	0.975329	0.603271	0.919837	0.956193	0.973102	0.497863	0.948096
MSTRG.34828	0.523384	0.734388	0.755394	0.920561	0.830283	0.825867	0.543171	0.728063	0.903596	0.840502	0.802735	0.920017	0.818643	0.632204	0.359992	0.930892	0.89837	0.404717	0.96142	0.670583	0.595898	0.57407	0.384344	0.106635	0.672758	0.894937	0.554196	0.835925	0.0906775	0.718951	0.902044	0.316218	0.29372	0.318897	0.767075	-0.161807	0.746382	0.911181	0.499405	0.925301	0.926526	0.698148	0.894484	0.175589	0.732633	0.68128	0.867845	0.0403613	0.707764
MSTRG.34961	0.798084	0.640117	0.693641	0.455415	0.585744	0.670474	0.771433	0.602629	0.544769	0.567262	0.568277	0.475051	0.755947	0.809952	0.994381	0.45799	0.341807	0.89317	0.32108	0.823523	0.880862	0.913222	0.981323	0.859655	0.664441	0.491969	0.858933	0.669897	0.94824	0.833841	0.408559	0.979228	0.897102	0.893453	0.642916	0.874669	0.662343	0.513481	0.581022	0.603689	0.500642	0.716817	0.565151	0.896056	0.622678	0.856043	0.689461	0.942459	0.870027
MSTRG.35192	0.701483	0.753623	0.637107	0.497106	0.619692	0.669066	0.711681	0.498622	0.578568	0.576749	0.665992	0.510643	0.748733	0.759072	0.979542	0.517579	0.361194	0.972071	0.351632	0.868377	0.868305	0.947506	0.993884	0.824154	0.542098	0.519526	0.778218	0.663854	0.962915	0.827473	0.43143	0.964964	0.973005	0.812491	0.698256	0.882771	0.667406	0.547358	0.4269	0.624891	0.528186	0.793955	0.57991	0.928804	0.520588	0.810713	0.717984	0.946774	0.852927
MSTRG.3552	0.933017	0.575275	0.892004	0.657224	0.720478	0.823807	0.836433	0.903405	0.72143	0.762788	0.571855	0.675351	0.883475	0.924684	0.844743	0.632282	0.610295	0.640931	0.603685	0.783611	0.88465	0.810244	0.799	0.699598	0.959387	0.705084	0.95458	0.850199	0.641781	0.89369	0.648389	0.816188	0.592339	0.891808	0.689974	0.488199	0.773519	0.70314	0.896097	0.785286	0.716418	0.671153	0.76532	0.629499	0.923906	0.959839	0.810473	0.637108	0.923387
MSTRG.35527	0.525428	0.625196	0.403133	0.259678	0.412948	0.442707	0.526972	0.256296	0.348034	0.375914	0.476388	0.26566	0.534474	0.592944	0.909737	0.28768	0.108721	0.927696	0.0926976	0.732122	0.726241	0.835845	0.927663	0.848182	0.327191	0.30692	0.604312	0.464702	0.973344	0.647195	0.181895	0.899552	0.944938	0.753333	0.515064	0.967264	0.458444	0.310997	0.271012	0.389917	0.29323	0.651073	0.348124	0.936364	0.286907	0.63569	0.516431	0.984222	0.677563
MSTRG.35903	0.885755	0.503213	0.785504	0.453271	0.561712	0.696788	0.869081	0.741428	0.539383	0.54398	0.508869	0.488759	0.774238	0.823375	0.946742	0.435511	0.379933	0.753715	0.350751	0.741154	0.853218	0.833527	0.90999	0.762355	0.784982	0.46498	0.93081	0.655174	0.854375	0.825675	0.438666	0.933189	0.770182	0.871243	0.593114	0.765137	0.679834	0.515298	0.683659	0.610605	0.498886	0.620348	0.571713	0.764711	0.740324	0.871764	0.656233	0.833892	0.872326
MSTRG.36047	0.788897	0.150815	0.685761	0.237718	0.308972	0.497453	0.780889	0.742435	0.318066	0.345395	0.185768	0.283696	0.593405	0.654581	0.721268	0.201154	0.211399	0.407928	0.198027	0.438463	0.613688	0.5422	0.650931	0.583157	0.79836	0.265158	0.819215	0.477534	0.572132	0.604016	0.253595	0.684379	0.416794	0.764076	0.29007	0.52739	0.445725	0.300608	0.757019	0.428036	0.301718	0.277401	0.373307	0.449821	0.719073	0.71637	0.433824	0.588018	0.69564
MSTRG.36799	0.929295	0.4367	0.899542	0.57136	0.618486	0.774771	0.910395	0.919006	0.636594	0.629863	0.508487	0.611541	0.837642	0.843041	0.80688	0.539096	0.543449	0.557046	0.53276	0.67483	0.806241	0.728893	0.754635	0.581612	0.94078	0.572135	0.957172	0.732902	0.608131	0.829507	0.583211	0.778941	0.54296	0.799979	0.59374	0.467262	0.723986	0.623934	0.827525	0.719083	0.620185	0.556696	0.678586	0.52986	0.90492	0.897321	0.709877	0.582541	0.88215
MSTRG.37396	0.649256	0.936799	0.673326	0.859788	0.916157	0.829491	0.45304	0.594478	0.883616	0.957225	0.808759	0.820682	0.828487	0.858739	0.685093	0.873348	0.774947	0.761506	0.780956	0.930696	0.864791	0.853282	0.702113	0.664185	0.656092	0.946527	0.658716	0.948192	0.546743	0.865538	0.798346	0.679417	0.653119	0.721193	0.904256	0.349104	0.812383	0.864139	0.63138	0.85288	0.893091	0.927851	0.890463	0.708136	0.683498	0.837873	0.933484	0.539611	0.797431
MSTRG.40352	0.840588	0.899126	0.909984	0.930571	0.959715	0.976382	0.779889	0.827414	0.963512	0.940467	0.914837	0.933425	0.9856	0.928328	0.803908	0.931848	0.864435	0.793804	0.867518	0.959082	0.943013	0.923174	0.811661	0.575074	0.823153	0.929367	0.871393	0.968245	0.623888	0.98389	0.899181	0.793834	0.731471	0.719559	0.955473	0.3925	0.947589	0.952046	0.665151	0.972638	0.949746	0.94108	0.967381	0.675461	0.858215	0.952204	0.991539	0.565008	0.954378
MSTRG.4261	0.641784	0.780125	0.552654	0.475754	0.612977	0.618873	0.578658	0.42592	0.556797	0.612675	0.611999	0.468782	0.702921	0.760839	0.951542	0.501193	0.327733	0.968436	0.324352	0.875062	0.857882	0.936708	0.965897	0.904558	0.511277	0.552479	0.710356	0.690188	0.937677	0.798345	0.393705	0.931998	0.938556	0.863467	0.680994	0.872899	0.613995	0.520186	0.470455	0.59315	0.521395	0.795541	0.564506	0.958547	0.477986	0.795564	0.71854	0.956047	0.813333
MSTRG.4262	0.91228	0.738885	0.81336	0.660204	0.781227	0.827479	0.778114	0.743183	0.731979	0.777868	0.686424	0.664707	0.865727	0.953038	0.963709	0.647913	0.578781	0.859148	0.539299	0.917086	0.978893	0.947059	0.940775	0.8522	0.806587	0.707375	0.932937	0.841108	0.87219	0.939917	0.628613	0.970284	0.838317	0.930498	0.806905	0.730671	0.83014	0.705714	0.740888	0.747729	0.702532	0.837192	0.759175	0.88344	0.790325	0.955505	0.826458	0.846933	0.921965
MSTRG.42862	0.861869	0.842955	0.943019	0.956197	0.967523	0.993282	0.791718	0.883459	0.979891	0.948089	0.900854	0.962381	0.985349	0.924436	0.73652	0.947102	0.91689	0.698127	0.91409	0.912353	0.913801	0.861874	0.735206	0.489877	0.865593	0.941183	0.877182	0.966436	0.532422	0.96784	0.942611	0.732464	0.637315	0.670945	0.946169	0.282605	0.964076	0.974038	0.700637	0.982456	0.971107	0.901268	0.98735	0.581857	0.908618	0.939889	0.978529	0.461037	0.929932
MSTRG.42956	0.746554	0.85836	0.843652	0.993888	0.991499	0.956019	0.624064	0.775298	0.992591	0.964318	0.919783	0.982975	0.901002	0.849236	0.573432	0.985187	0.975383	0.605145	0.960568	0.864939	0.831489	0.765395	0.583248	0.367877	0.744938	0.974612	0.734313	0.932938	0.393199	0.886087	0.984705	0.593174	0.537241	0.521305	0.965121	0.12294	0.95032	0.992594	0.595537	0.945347	0.990904	0.90454	0.990151	0.497104	0.819344	0.826127	0.940015	0.304659	0.797341
MSTRG.45803	0.860036	0.766714	0.947333	0.957094	0.951566	0.981454	0.768245	0.919257	0.97154	0.944303	0.850589	0.963247	0.959879	0.905386	0.648847	0.937953	0.944098	0.579939	0.938384	0.844425	0.863516	0.777994	0.636626	0.410362	0.897618	0.940789	0.858307	0.953585	0.418936	0.927611	0.959264	0.647565	0.514135	0.624922	0.908449	0.158929	0.948549	0.97042	0.74528	0.969127	0.972159	0.835832	0.98523	0.474295	0.943086	0.910881	0.946996	0.345498	0.883519
MSTRG.49862	0.871684	0.880965	0.88821	0.848705	0.914397	0.945858	0.823874	0.776285	0.895878	0.862173	0.902487	0.859212	0.956959	0.927925	0.896832	0.848637	0.772028	0.879936	0.750907	0.974111	0.975699	0.970502	0.903943	0.655153	0.771358	0.831929	0.90597	0.899322	0.779316	0.988157	0.817712	0.903763	0.85577	0.756559	0.943745	0.574494	0.943737	0.880339	0.599589	0.899373	0.861446	0.950434	0.897127	0.794488	0.802596	0.946855	0.93545	0.70699	0.955734
MSTRG.52674	0.837089	0.627692	0.727162	0.477546	0.606884	0.696229	0.793706	0.646791	0.565477	0.590088	0.570751	0.498033	0.774047	0.837744	0.991994	0.473738	0.374994	0.870614	0.347652	0.825173	0.896033	0.909365	0.972221	0.854546	0.707697	0.512251	0.888854	0.68976	0.935231	0.850263	0.438702	0.981582	0.875526	0.905301	0.656802	0.851602	0.690074	0.535592	0.625759	0.620002	0.52295	0.71784	0.589689	0.883616	0.667661	0.876765	0.700114	0.92424	0.88019
MSTRG.53236	0.780538	0.37383	0.739569	0.350689	0.416062	0.594833	0.85993	0.730303	0.43703	0.42457	0.384291	0.399064	0.715846	0.695963	0.856174	0.340808	0.273579	0.633032	0.289382	0.602755	0.713386	0.718301	0.819512	0.642281	0.76676	0.36144	0.855912	0.569458	0.711811	0.720233	0.333377	0.799917	0.632667	0.792227	0.427273	0.651355	0.529902	0.415478	0.656815	0.565294	0.408347	0.453657	0.471417	0.586114	0.698663	0.796205	0.581013	0.721868	0.830589
MSTRG.5377	0.607083	0.771151	0.811175	0.967093	0.895005	0.888966	0.59838	0.770585	0.95205	0.883843	0.86242	0.967668	0.861799	0.700962	0.418025	0.969686	0.952707	0.454939	0.991009	0.72902	0.669173	0.629632	0.438141	0.149608	0.709614	0.928346	0.624266	0.869541	0.168717	0.779944	0.957127	0.395515	0.361854	0.357302	0.841912	-0.0999525	0.832051	0.95977	0.523161	0.952442	0.965547	0.765569	0.943065	0.250649	0.780265	0.730312	0.899186	0.0957883	0.74423
MSTRG.54885	0.904695	0.671884	0.985229	0.81408	0.816997	0.93386	0.939771	0.952105	0.856716	0.791577	0.777726	0.850182	0.971412	0.874692	0.788157	0.799435	0.775761	0.652482	0.786266	0.810835	0.864456	0.821417	0.771112	0.464569	0.922291	0.77323	0.947343	0.86393	0.562996	0.931404	0.813291	0.759196	0.618807	0.690173	0.797226	0.351386	0.878341	0.851027	0.72128	0.919988	0.838659	0.750273	0.872619	0.518665	0.933842	0.93931	0.887871	0.499871	0.960243
MSTRG.55919	0.89492	0.817839	0.953037	0.869443	0.900192	0.964894	0.872992	0.887386	0.914219	0.880818	0.856613	0.887067	0.996264	0.933274	0.852677	0.865008	0.805287	0.781356	0.810621	0.925163	0.943837	0.920323	0.848414	0.590294	0.882119	0.859361	0.935892	0.936958	0.659435	0.98736	0.846217	0.83226	0.732904	0.761674	0.89516	0.444663	0.924528	0.902095	0.711462	0.952598	0.895845	0.877878	0.925425	0.6648	0.899254	0.978014	0.960109	0.604923	0.988953
MSTRG.56392	0.633899	0.782879	0.703804	0.591085	0.640017	0.721028	0.792761	0.553911	0.655832	0.568396	0.773262	0.623455	0.811057	0.67383	0.895438	0.624982	0.456982	0.924626	0.491234	0.835604	0.794245	0.91044	0.932143	0.590447	0.531701	0.55223	0.745195	0.663619	0.818132	0.820995	0.527078	0.851842	0.917585	0.635409	0.709888	0.702524	0.682042	0.635265	0.309721	0.736473	0.605851	0.782997	0.638058	0.748505	0.532133	0.77931	0.769734	0.778968	0.883036
MSTRG.58802	0.856467	0.798915	0.926871	0.955517	0.963047	0.976686	0.735665	0.895864	0.973093	0.968039	0.848047	0.95412	0.958381	0.92639	0.67245	0.938997	0.932767	0.614719	0.926559	0.873581	0.886397	0.80464	0.661031	0.472858	0.892062	0.960118	0.853569	0.975786	0.450495	0.938745	0.949093	0.671028	0.54026	0.669633	0.921544	0.196694	0.945788	0.968555	0.765231	0.966231	0.976249	0.861456	0.988781	0.524679	0.932527	0.925217	0.961808	0.388756	0.889666
MSTRG.58809	0.883048	0.88463	0.901582	0.880125	0.940156	0.961661	0.798289	0.811764	0.924095	0.914712	0.887985	0.883567	0.972311	0.957487	0.872664	0.8772	0.809072	0.843846	0.793553	0.977735	0.981853	0.958689	0.873716	0.665952	0.821884	0.885707	0.909112	0.948208	0.726353	0.99756	0.849168	0.874035	0.798836	0.78631	0.950448	0.512801	0.949497	0.908478	0.679434	0.927319	0.901693	0.94868	0.932245	0.766726	0.848575	0.970407	0.964937	0.667597	0.962513
MSTRG.6332	0.309839	0.336985	0.155426	-0.0777063	0.0760117	0.134331	0.353883	0.0519762	0.0201993	0.0781389	0.138541	-0.0673668	0.272073	0.349087	0.765732	-0.0454207	-0.233562	0.741087	-0.22766	0.460907	0.475935	0.609413	0.773581	0.789832	0.154016	0.00131322	0.404153	0.199618	0.855191	0.382025	-0.159612	0.727935	0.762366	0.665594	0.174221	0.94793	0.128242	-0.0203882	0.168749	0.10528	-0.0258988	0.337499	0.0300944	0.781892	0.0679826	0.41763	0.238267	0.921547	0.46909
MSTRG.6481	0.862348	0.392725	0.786496	0.41982	0.498138	0.654798	0.844831	0.800721	0.502182	0.528352	0.393744	0.456387	0.751546	0.791115	0.855263	0.396579	0.362223	0.606214	0.357947	0.643595	0.775073	0.731059	0.803601	0.697106	0.858329	0.455451	0.906632	0.654115	0.695723	0.76927	0.412412	0.815336	0.593564	0.863874	0.490309	0.612064	0.601468	0.480582	0.79188	0.603552	0.483233	0.496688	0.548155	0.60945	0.793389	0.856024	0.628944	0.705762	0.846543
MSTRG.6483	0.815186	0.357947	0.72488	0.328614	0.419395	0.58637	0.836573	0.719076	0.418245	0.430663	0.355983	0.37111	0.694084	0.728976	0.875262	0.310824	0.258365	0.637189	0.251774	0.61106	0.740328	0.723723	0.829388	0.706213	0.772453	0.352961	0.872143	0.566668	0.755717	0.723484	0.316189	0.836237	0.645232	0.839078	0.433871	0.701199	0.541026	0.394466	0.694022	0.526535	0.387781	0.460724	0.458793	0.641596	0.702399	0.803523	0.55911	0.764826	0.812367
MSTRG.64878	0.736996	0.875157	0.729639	0.698911	0.78521	0.794605	0.669995	0.634792	0.764129	0.809232	0.744024	0.691319	0.870277	0.872912	0.922599	0.71992	0.570159	0.923761	0.591418	0.950821	0.925262	0.970633	0.934071	0.822873	0.702827	0.772154	0.801478	0.879425	0.801586	0.915061	0.625232	0.885254	0.851564	0.875404	0.808887	0.666145	0.754986	0.734767	0.634359	0.80986	0.748963	0.878451	0.775567	0.852508	0.683973	0.918671	0.897962	0.813783	0.930975
MSTRG.64982	0.863715	0.866579	0.881114	0.911732	0.966862	0.96709	0.758092	0.776477	0.938879	0.902655	0.928213	0.914235	0.928624	0.919657	0.782156	0.900053	0.870681	0.779557	0.825709	0.942376	0.944949	0.897317	0.785999	0.550838	0.75471	0.879607	0.862693	0.899035	0.669866	0.959819	0.900263	0.817773	0.759537	0.660644	0.984462	0.432258	0.989309	0.930565	0.585773	0.897623	0.908576	0.956314	0.938142	0.716537	0.814103	0.898767	0.920091	0.569365	0.878911
MSTRG.67004	0.898029	0.763149	0.957598	0.923469	0.935935	0.977208	0.797647	0.933329	0.94966	0.939948	0.822225	0.930469	0.972831	0.940731	0.718252	0.903969	0.899154	0.625523	0.892989	0.867801	0.901027	0.818734	0.700037	0.49989	0.930828	0.9242	0.901836	0.965291	0.491494	0.952338	0.920395	0.711464	0.559957	0.709104	0.896338	0.247648	0.940916	0.943947	0.796727	0.959539	0.948919	0.83741	0.969689	0.538682	0.960209	0.951358	0.951713	0.432337	0.920843
MSTRG.67343	0.794611	0.887191	0.896268	0.981664	0.985004	0.981542	0.721274	0.821752	0.996111	0.961301	0.934045	0.98015	0.962275	0.88835	0.685623	0.979519	0.938866	0.697064	0.940338	0.914888	0.886084	0.84681	0.696372	0.449085	0.79777	0.965894	0.809164	0.962595	0.491826	0.943676	0.961159	0.684615	0.628332	0.609885	0.966496	0.234949	0.956723	0.991495	0.631393	0.984085	0.98948	0.925671	0.995446	0.565509	0.853716	0.897361	0.983051	0.417122	0.891484
MSTRG.68609	0.761707	0.80045	0.880393	0.993373	0.972039	0.963896	0.677389	0.822342	0.988317	0.931201	0.912784	0.993881	0.905567	0.825004	0.540132	0.979147	0.991125	0.545349	0.97696	0.818244	0.799599	0.723101	0.54583	0.281098	0.768643	0.946336	0.749855	0.904118	0.343017	0.871308	0.998308	0.558989	0.488909	0.466461	0.940063	0.0641752	0.953319	0.993242	0.586427	0.949789	0.984275	0.858913	0.985232	0.41851	0.847674	0.811692	0.917828	0.239676	0.791808
MSTRG.69887	0.903578	0.69172	0.933537	0.867035	0.887445	0.932905	0.76294	0.941557	0.897531	0.923445	0.724683	0.869913	0.937533	0.944349	0.700548	0.841091	0.848869	0.566833	0.842479	0.823523	0.88005	0.776771	0.668059	0.539108	0.966011	0.897644	0.898322	0.956023	0.460502	0.921231	0.866747	0.688347	0.490767	0.758784	0.832238	0.233738	0.889178	0.889593	0.880895	0.914566	0.906645	0.771474	0.930157	0.516101	0.976969	0.949116	0.91484	0.424502	0.896969
MSTRG.71644	0.815058	0.762786	0.931633	0.957584	0.934739	0.964717	0.745855	0.909843	0.968377	0.937837	0.840411	0.963468	0.952532	0.871516	0.610459	0.943659	0.941157	0.551628	0.952678	0.820721	0.826225	0.751238	0.602768	0.368147	0.885729	0.944269	0.822209	0.950655	0.360711	0.903976	0.9551	0.59569	0.472584	0.592397	0.883553	0.101324	0.916235	0.968298	0.731639	0.978164	0.975246	0.811203	0.980337	0.419886	0.929113	0.890466	0.948587	0.296758	0.873265
MSTRG.71654	0.78772	0.869477	0.890912	0.980174	0.982028	0.980872	0.734822	0.797055	0.98864	0.920512	0.964751	0.985051	0.938695	0.853535	0.65902	0.974556	0.950444	0.684024	0.934429	0.892839	0.865255	0.823706	0.67388	0.377509	0.744533	0.927467	0.795105	0.908227	0.49554	0.923409	0.971337	0.67738	0.642432	0.528156	0.978155	0.23053	0.977539	0.988255	0.540317	0.957969	0.969973	0.926598	0.97955	0.550397	0.819302	0.852589	0.944201	0.389702	0.853315
MSTRG.72488	0.618557	0.501992	0.422122	0.216192	0.395266	0.43687	0.550173	0.294199	0.303111	0.33547	0.413675	0.22668	0.486178	0.619854	0.886151	0.217544	0.109312	0.838093	0.0405042	0.674346	0.730046	0.774368	0.878991	0.835176	0.360191	0.243409	0.653919	0.404942	0.985524	0.625252	0.173425	0.918192	0.895968	0.748285	0.498333	0.975359	0.494195	0.26994	0.316608	0.306906	0.238952	0.600368	0.313509	0.931177	0.328805	0.616076	0.427223	0.964052	0.614948
MSTRG.72555	0.798719	0.708987	0.716413	0.527349	0.647664	0.712986	0.748754	0.633448	0.612774	0.654526	0.606598	0.537658	0.802682	0.850935	0.990671	0.534433	0.407019	0.905974	0.401632	0.870358	0.909224	0.941204	0.980768	0.881139	0.707816	0.587124	0.861012	0.753279	0.911552	0.871224	0.470842	0.963967	0.880359	0.927306	0.689394	0.822037	0.689534	0.580547	0.642678	0.673925	0.580753	0.763543	0.634998	0.893496	0.665341	0.898667	0.764501	0.920622	0.906914
MSTRG.73507	0.586598	0.773648	0.511012	0.456396	0.584422	0.580197	0.516063	0.401219	0.536611	0.61668	0.564232	0.442244	0.680983	0.736108	0.914977	0.487768	0.299544	0.937841	0.316734	0.85166	0.821542	0.908348	0.930431	0.910818	0.505587	0.562048	0.661874	0.699779	0.877685	0.766884	0.363596	0.877045	0.881875	0.872788	0.638147	0.82374	0.555151	0.498099	0.497847	0.587038	0.514147	0.76108	0.548035	0.919764	0.459894	0.780333	0.718666	0.923932	0.796994
MSTRG.74226	0.706044	0.861205	0.804834	0.98959	0.986422	0.934978	0.576919	0.728028	0.982741	0.951803	0.923241	0.974994	0.868325	0.817762	0.534909	0.98237	0.973785	0.590737	0.954643	0.849668	0.804918	0.741223	0.549645	0.337252	0.69267	0.966036	0.688778	0.907985	0.370803	0.857185	0.980293	0.562162	0.525522	0.474752	0.964168	0.0998323	0.938355	0.983905	0.543661	0.922014	0.980158	0.903816	0.975918	0.484648	0.775705	0.785428	0.918189	0.276212	0.755525
MSTRG.74227	0.623182	0.867093	0.760127	0.97402	0.949289	0.890299	0.507885	0.705888	0.966727	0.962268	0.870511	0.951779	0.856976	0.780553	0.491965	0.979102	0.939565	0.559832	0.960479	0.824607	0.754438	0.712874	0.511737	0.337515	0.693585	0.989124	0.625352	0.933468	0.281861	0.822713	0.945558	0.483681	0.452411	0.487115	0.905563	0.0246814	0.854744	0.965245	0.579858	0.937578	0.983328	0.859613	0.963473	0.420443	0.757192	0.774792	0.937878	0.230052	0.754567
MSTRG.76860	0.663918	0.537212	0.469596	0.288573	0.465604	0.49779	0.57208	0.337777	0.368751	0.39331	0.475461	0.297615	0.523936	0.66236	0.881436	0.28405	0.19534	0.837369	0.11319	0.708255	0.766149	0.790638	0.873132	0.814177	0.392162	0.302967	0.685102	0.446351	0.978624	0.663989	0.254746	0.928153	0.899314	0.737637	0.566253	0.942037	0.567375	0.338549	0.33494	0.352238	0.303127	0.651192	0.377664	0.934719	0.376539	0.641991	0.465762	0.937121	0.629913
MSTRG.79264	0.787369	0.897925	0.896425	0.975575	0.977871	0.97968	0.735324	0.8149	0.992439	0.950347	0.942851	0.976533	0.968291	0.881096	0.70317	0.977145	0.925262	0.720628	0.932204	0.92197	0.887734	0.861322	0.717618	0.453489	0.788112	0.956342	0.810724	0.957891	0.510942	0.947682	0.950957	0.697192	0.653094	0.610605	0.96429	0.258093	0.951074	0.987119	0.611584	0.988082	0.983404	0.930221	0.989426	0.576481	0.842284	0.899519	0.987052	0.437465	0.904162
MSTRG.79387	0.772356	0.484336	0.641332	0.318849	0.451465	0.567894	0.75501	0.584037	0.415307	0.450752	0.413221	0.345662	0.671401	0.745088	0.955136	0.314405	0.214787	0.794674	0.195463	0.706987	0.799441	0.82015	0.926583	0.844506	0.658951	0.364842	0.832833	0.573077	0.906486	0.746398	0.28107	0.931157	0.806531	0.890694	0.500163	0.869193	0.550397	0.383415	0.603874	0.49606	0.374444	0.572	0.446474	0.825241	0.593842	0.799966	0.576807	0.919658	0.808518
MSTRG.79408	0.300193	0.335115	0.148009	-0.0830298	0.0699716	0.128353	0.351781	0.0401301	0.0142045	0.0664261	0.141356	-0.0717101	0.264618	0.337058	0.760862	-0.0499684	-0.239	0.741669	-0.233858	0.45555	0.468165	0.605158	0.770604	0.778139	0.13787	-0.00929913	0.39553	0.18683	0.856034	0.374663	-0.164696	0.72451	0.766581	0.649882	0.17142	0.949677	0.12445	-0.0259562	0.146396	0.0980557	-0.0338284	0.335397	0.0221272	0.779349	0.054092	0.406135	0.229703	0.919033	0.461036
MSTRG.79477	0.950525	0.668529	0.920636	0.73314	0.798725	0.883799	0.85189	0.905354	0.793652	0.821835	0.670834	0.748281	0.929575	0.960204	0.87537	0.712097	0.680623	0.709974	0.668451	0.855006	0.935875	0.870225	0.839843	0.708755	0.949676	0.76906	0.971821	0.896166	0.684639	0.945615	0.71999	0.856526	0.663764	0.886976	0.778963	0.510407	0.844898	0.775806	0.86282	0.840874	0.782946	0.762544	0.829438	0.684557	0.930694	0.988049	0.86963	0.662985	0.956526
MSTRG.79482	0.932291	0.66378	0.934896	0.809226	0.84669	0.911918	0.800795	0.943567	0.85202	0.884599	0.684838	0.817107	0.934117	0.956419	0.764407	0.782635	0.781357	0.603965	0.772765	0.825674	0.89959	0.803168	0.72638	0.607655	0.979817	0.846377	0.934837	0.935669	0.535615	0.928682	0.806439	0.748078	0.537274	0.819956	0.79983	0.330169	0.867155	0.840277	0.901809	0.883544	0.855912	0.752463	0.889241	0.569282	0.975374	0.969699	0.893495	0.508874	0.920533
MSTRG.7986	0.803762	0.723022	0.682852	0.525703	0.669926	0.710747	0.71639	0.571448	0.606726	0.640601	0.641679	0.532229	0.76372	0.848473	0.986979	0.527105	0.416441	0.929706	0.375471	0.883487	0.923798	0.944801	0.979669	0.882486	0.63466	0.565514	0.844484	0.712017	0.968443	0.862716	0.477835	0.995885	0.933615	0.887357	0.733866	0.873726	0.728931	0.575635	0.561948	0.625026	0.561036	0.806129	0.622355	0.955997	0.613397	0.860584	0.726182	0.946556	0.854716
MSTRG.79901	0.871047	0.476214	0.793596	0.454569	0.544512	0.687449	0.856849	0.779338	0.539679	0.560351	0.464095	0.488545	0.782834	0.819201	0.912753	0.437868	0.381447	0.698338	0.374323	0.712596	0.825767	0.801267	0.871077	0.746458	0.835225	0.487266	0.921919	0.682769	0.774422	0.813079	0.437113	0.877591	0.689137	0.887139	0.552824	0.686421	0.643182	0.515696	0.755219	0.633109	0.513541	0.574661	0.579012	0.693997	0.777085	0.882804	0.671404	0.777774	0.88185
MSTRG.79970	0.814335	0.652877	0.786006	0.59214	0.665305	0.74728	0.755063	0.768871	0.667017	0.727164	0.557737	0.601514	0.849227	0.869881	0.892893	0.59246	0.494074	0.754086	0.520575	0.815911	0.867404	0.862445	0.868469	0.792035	0.850735	0.674776	0.872537	0.833811	0.709937	0.868008	0.545018	0.836067	0.683128	0.926839	0.652769	0.595682	0.677762	0.639868	0.809907	0.756604	0.663606	0.689832	0.703249	0.712146	0.79648	0.934375	0.815502	0.744769	0.928838
MSTRG.80218	0.812718	0.8278	0.927742	0.979472	0.966926	0.985007	0.754112	0.874531	0.991207	0.946552	0.905459	0.98479	0.966103	0.878965	0.651003	0.970992	0.952009	0.628468	0.95657	0.870439	0.85906	0.802883	0.653872	0.390699	0.841255	0.953526	0.824502	0.952963	0.431135	0.930141	0.97066	0.645532	0.560593	0.586055	0.935168	0.168326	0.950706	0.990043	0.665479	0.989192	0.988101	0.875199	0.994572	0.489578	0.89536	0.894532	0.968257	0.353476	0.887765
MSTRG.80222	0.852828	0.858832	0.869254	0.783823	0.851805	0.902132	0.831433	0.769931	0.843465	0.82771	0.836962	0.796356	0.952719	0.917129	0.940054	0.791144	0.685172	0.903498	0.687543	0.963317	0.966429	0.984177	0.945483	0.719908	0.787819	0.793468	0.909238	0.894483	0.804559	0.978704	0.738657	0.920025	0.864361	0.823262	0.877555	0.628748	0.874043	0.822707	0.638032	0.883233	0.814402	0.906456	0.850681	0.808352	0.792126	0.964065	0.929337	0.766006	0.985512
MSTRG.80223	0.826133	0.852058	0.915511	0.981931	0.987234	0.991328	0.7437	0.844782	0.994137	0.950372	0.930718	0.984255	0.95695	0.893856	0.673285	0.971568	0.955044	0.665864	0.941305	0.896821	0.885541	0.826768	0.677724	0.421513	0.810939	0.950947	0.828638	0.945127	0.486625	0.941038	0.974325	0.68529	0.611781	0.591053	0.969062	0.222787	0.978484	0.992083	0.635163	0.971129	0.983446	0.91341	0.994746	0.54993	0.873481	0.891449	0.961448	0.396092	0.876959
MSTRG.80453	0.428905	0.375962	0.248747	-0.000355401	0.16743	0.227782	0.429498	0.145999	0.0989764	0.159744	0.202193	0.0104323	0.345721	0.452768	0.827532	0.0204451	-0.14284	0.77663	-0.160005	0.531075	0.569369	0.67083	0.825447	0.840311	0.246979	0.0723626	0.505315	0.272724	0.914737	0.46768	-0.0704633	0.808042	0.807262	0.732434	0.264364	0.981528	0.237726	0.0589869	0.255775	0.16549	0.0486645	0.410947	0.113811	0.844533	0.169287	0.500598	0.298909	0.961848	0.530971
MSTRG.81799	0.74192	0.747071	0.840817	0.968006	0.951237	0.932576	0.634564	0.779369	0.954672	0.888631	0.892297	0.968	0.843816	0.7847	0.475031	0.945486	0.98762	0.483854	0.949248	0.766386	0.757451	0.660404	0.477858	0.217918	0.712059	0.901689	0.708915	0.839785	0.310133	0.820204	0.987847	0.518481	0.448742	0.390209	0.924993	0.0284697	0.947934	0.963437	0.526985	0.887195	0.945053	0.828837	0.94898	0.385126	0.806384	0.7455	0.849669	0.184166	0.711942
MSTRG.81841	0.774045	0.913422	0.881155	0.975594	0.981352	0.975246	0.720621	0.790354	0.991686	0.947948	0.95489	0.974875	0.960128	0.874139	0.703589	0.979069	0.922472	0.736068	0.926821	0.929348	0.888064	0.867218	0.721682	0.456135	0.762115	0.954531	0.797251	0.951083	0.523516	0.944585	0.948679	0.701414	0.671169	0.600515	0.973496	0.271371	0.952246	0.986056	0.583693	0.981217	0.980385	0.943807	0.985856	0.592618	0.820009	0.889088	0.984269	0.446936	0.895229
MSTRG.82339	0.33615	0.350541	0.174933	-0.0586546	0.0995124	0.156681	0.370496	0.0682349	0.0393414	0.0960455	0.159151	-0.0482725	0.287967	0.37202	0.781521	-0.0287695	-0.211707	0.754758	-0.212779	0.480089	0.49909	0.626365	0.788079	0.801117	0.168491	0.0167844	0.426008	0.214049	0.874832	0.402377	-0.137904	0.749867	0.780212	0.677148	0.19968	0.961129	0.15677	-0.00106182	0.179415	0.117797	-0.0089919	0.359795	0.0493638	0.8021	0.0861089	0.434452	0.25152	0.934417	0.481645
MSTRG.82761	0.519034	0.429709	0.410924	0.12289	0.250538	0.352064	0.580108	0.332045	0.223589	0.262618	0.281372	0.145468	0.499118	0.534372	0.877777	0.145936	-0.0231991	0.789279	-0.00388531	0.590363	0.63009	0.73223	0.873574	0.813466	0.420154	0.189516	0.619038	0.403225	0.870914	0.572817	0.0520799	0.823033	0.791211	0.78751	0.319982	0.903786	0.315072	0.186215	0.387862	0.335433	0.183972	0.447674	0.242507	0.784237	0.334698	0.625598	0.436813	0.926239	0.67801
MSTRG.83642	0.760958	0.85876	0.718824	0.653908	0.763941	0.782907	0.71023	0.592453	0.724332	0.742378	0.762706	0.654782	0.843249	0.85964	0.969804	0.671168	0.527438	0.974948	0.520304	0.95409	0.941372	0.992344	0.983033	0.83387	0.642249	0.693918	0.821493	0.80858	0.908114	0.91251	0.588391	0.957262	0.944502	0.852799	0.818315	0.782	0.775494	0.695037	0.541203	0.752403	0.688155	0.893564	0.728991	0.925639	0.633911	0.893702	0.844084	0.89056	0.912482
MSTRG.83727	0.906127	0.377655	0.911382	0.648146	0.656067	0.792365	0.835356	0.975488	0.688052	0.688555	0.488261	0.680374	0.818385	0.822468	0.627626	0.602798	0.66505	0.36442	0.653393	0.595343	0.731607	0.598391	0.565518	0.419566	0.985422	0.647843	0.90098	0.758825	0.376755	0.780059	0.682339	0.606981	0.327943	0.692694	0.58983	0.196702	0.736226	0.685134	0.890082	0.747358	0.692353	0.501421	0.735265	0.338183	0.967963	0.851867	0.706827	0.3423	0.805254
MSTRG.84631	0.773731	0.890063	0.888087	0.980932	0.979769	0.979174	0.735008	0.792101	0.991649	0.925345	0.969374	0.98533	0.949175	0.851614	0.673209	0.980614	0.940636	0.706305	0.935904	0.905013	0.867786	0.839969	0.691918	0.392517	0.743683	0.935106	0.791189	0.920292	0.501902	0.92962	0.964318	0.681392	0.656316	0.541784	0.97573	0.240993	0.965997	0.989793	0.540032	0.971788	0.974916	0.933034	0.981706	0.558089	0.813445	0.861765	0.960963	0.40555	0.871026
MSTRG.84660	0.802562	0.815814	0.914399	0.989006	0.974937	0.982093	0.726591	0.860292	0.993944	0.945763	0.909776	0.992147	0.944458	0.865522	0.608879	0.97656	0.974025	0.593875	0.967764	0.852402	0.841489	0.772485	0.611312	0.350778	0.819326	0.954501	0.801841	0.937148	0.399074	0.911135	0.98749	0.615839	0.531949	0.543159	0.94269	0.127986	0.959788	0.99533	0.642447	0.974371	0.990208	0.872068	0.995548	0.46522	0.88419	0.866031	0.949343	0.309265	0.850473
MSTRG.84802	0.820544	0.805059	0.904792	0.978984	0.977272	0.974369	0.695988	0.865903	0.98622	0.968963	0.872796	0.974936	0.935846	0.895146	0.612843	0.962208	0.966445	0.58161	0.954583	0.856027	0.85623	0.770464	0.606963	0.404859	0.847108	0.969429	0.808931	0.95813	0.400373	0.913404	0.977201	0.622042	0.510651	0.595742	0.936659	0.134144	0.953722	0.985252	0.70878	0.960999	0.988805	0.866735	0.995808	0.48541	0.903699	0.882395	0.949073	0.323675	0.845653
MSTRG.85732	0.771213	0.817302	0.879501	0.990333	0.978349	0.968644	0.687864	0.809003	0.987782	0.926617	0.930312	0.991496	0.907867	0.832589	0.567843	0.976796	0.98407	0.580537	0.963242	0.837513	0.818102	0.747022	0.575661	0.303618	0.753566	0.938321	0.75998	0.898659	0.388048	0.882923	0.993996	0.592632	0.532779	0.475146	0.95633	0.111276	0.966668	0.991724	0.564689	0.944112	0.978024	0.881112	0.982443	0.458993	0.835031	0.816188	0.917697	0.27869	0.798442
MSTRG.86886	0.916136	0.822785	0.904	0.894998	0.959644	0.968617	0.76817	0.828405	0.927406	0.921091	0.870688	0.895398	0.935328	0.964206	0.79736	0.874515	0.861924	0.747272	0.812282	0.933966	0.964702	0.890154	0.785554	0.604824	0.829139	0.88636	0.904468	0.924587	0.66656	0.971053	0.889083	0.831	0.719607	0.734292	0.962287	0.433982	0.985792	0.917236	0.696933	0.891063	0.904497	0.927187	0.939502	0.718571	0.873795	0.935998	0.919039	0.580986	0.893291
MSTRG.90264	0.727571	0.940222	0.75677	0.7811	0.851652	0.848814	0.686949	0.634503	0.834664	0.841313	0.850935	0.775702	0.900611	0.864716	0.896905	0.804972	0.658599	0.942245	0.675287	0.981421	0.932204	0.984608	0.921664	0.738954	0.668393	0.818534	0.790833	0.891968	0.784327	0.936782	0.711356	0.871841	0.879696	0.789482	0.884553	0.619177	0.821145	0.810397	0.549379	0.861411	0.812198	0.942482	0.832882	0.836449	0.677086	0.906182	0.933711	0.764759	0.932382
MSTRG.90554	0.720341	0.721822	0.605255	0.472183	0.613974	0.638537	0.61752	0.515404	0.557858	0.638773	0.556313	0.466335	0.726055	0.818297	0.965443	0.485049	0.339323	0.917897	0.330124	0.862218	0.882828	0.924705	0.96002	0.943001	0.61869	0.566701	0.775805	0.725117	0.921165	0.819971	0.401623	0.943935	0.881857	0.938562	0.661814	0.854737	0.626245	0.520832	0.607801	0.60166	0.530436	0.759711	0.580444	0.940728	0.571102	0.846831	0.724198	0.950383	0.839804
MSTRG.92956	0.911425	0.580508	0.77985	0.513434	0.642836	0.734979	0.810885	0.729478	0.596133	0.635241	0.551681	0.532481	0.790108	0.890132	0.961	0.49314	0.440727	0.79291	0.394543	0.809791	0.91366	0.876115	0.923623	0.838762	0.793596	0.55033	0.935539	0.722602	0.884214	0.866201	0.494554	0.965014	0.798598	0.924037	0.673184	0.780619	0.736927	0.569557	0.730141	0.634036	0.559781	0.702952	0.630828	0.84263	0.75733	0.904678	0.704227	0.86391	0.875259
MSTRG.94801	0.806831	0.749767	0.687708	0.585897	0.728401	0.746861	0.700443	0.554698	0.653143	0.661595	0.716582	0.590788	0.75638	0.843181	0.937663	0.581398	0.497785	0.912634	0.430926	0.891492	0.924705	0.928502	0.935667	0.8044	0.589206	0.592048	0.826072	0.699805	0.94884	0.862867	0.551832	0.97725	0.936995	0.7976	0.801991	0.825835	0.796282	0.627727	0.486302	0.630577	0.598867	0.854156	0.659327	0.945607	0.59946	0.825913	0.721654	0.887451	0.8117
MSTRG.94898	0.565724	0.786444	0.784034	0.923235	0.849555	0.852545	0.593325	0.744031	0.91812	0.861367	0.829886	0.923958	0.863638	0.682036	0.458268	0.938254	0.880707	0.501154	0.947035	0.735759	0.660808	0.656457	0.48429	0.20436	0.700798	0.907715	0.609716	0.87252	0.194528	0.774937	0.893667	0.407763	0.389986	0.404873	0.797035	-0.0495623	0.769632	0.920757	0.526999	0.952142	0.936184	0.747833	0.910051	0.271712	0.750287	0.74175	0.910049	0.152962	0.775974
MSTRG.95510	0.857428	0.878598	0.923569	0.908331	0.938933	0.971914	0.812201	0.845673	0.946616	0.921882	0.895748	0.91588	0.99255	0.932163	0.829318	0.909143	0.839114	0.800209	0.845518	0.953664	0.947272	0.930256	0.833848	0.591306	0.843514	0.907133	0.894514	0.961768	0.644025	0.988697	0.877115	0.813141	0.740541	0.743057	0.935062	0.420364	0.93698	0.934179	0.682742	0.968605	0.931543	0.923293	0.952999	0.680336	0.870428	0.965832	0.98591	0.589829	0.972858
MSTRG.9602	0.842834	0.66186	0.771854	0.755148	0.840668	0.841141	0.677664	0.676384	0.776709	0.73968	0.782967	0.760968	0.751934	0.82619	0.674397	0.71935	0.761404	0.630779	0.655962	0.78615	0.842757	0.742566	0.65846	0.475345	0.644414	0.694516	0.794908	0.706888	0.645154	0.820101	0.779825	0.762178	0.668795	0.552731	0.873154	0.432416	0.920847	0.773182	0.496667	0.685407	0.731906	0.820334	0.780242	0.667879	0.715926	0.750291	0.70554	0.50979	0.691767
MSTRG.96620	0.89521	0.644354	0.921528	0.711453	0.746229	0.859432	0.884182	0.908389	0.771905	0.769334	0.660543	0.737693	0.932545	0.894235	0.851157	0.700224	0.648656	0.68862	0.66784	0.811777	0.877793	0.84308	0.824239	0.629306	0.934637	0.731735	0.944642	0.865059	0.630436	0.915917	0.692539	0.805144	0.63549	0.82986	0.722989	0.463509	0.79111	0.756085	0.81208	0.855651	0.762859	0.709871	0.802173	0.601479	0.909203	0.962447	0.862346	0.617014	0.967172
MSTRG.97036	0.904895	0.602217	0.886833	0.686431	0.737387	0.829705	0.807824	0.902805	0.746211	0.793318	0.583785	0.699912	0.893026	0.919859	0.817846	0.665979	0.635818	0.630088	0.642521	0.788901	0.873963	0.804577	0.77642	0.682611	0.961703	0.744221	0.930078	0.878261	0.595317	0.892593	0.671562	0.779884	0.563859	0.881389	0.697603	0.435194	0.767784	0.728272	0.905043	0.813885	0.748858	0.678901	0.789199	0.600708	0.926744	0.960016	0.837797	0.599784	0.92563
MSTRG.97863	0.835436	0.855126	0.903589	0.95231	0.974798	0.983419	0.770595	0.804806	0.968643	0.903654	0.95438	0.960319	0.940155	0.881909	0.713798	0.941756	0.922548	0.718277	0.890819	0.907967	0.899821	0.852111	0.722489	0.43397	0.757349	0.897389	0.838605	0.896121	0.572282	0.94221	0.947342	0.742127	0.693282	0.574161	0.981471	0.315905	0.993056	0.966156	0.555177	0.933937	0.942066	0.934235	0.962617	0.612394	0.827955	0.873638	0.928772	0.46102	0.867963
[truncated: 427 more columns]

## Sheet: tree2
	gene10051	gene10083	gene10136	gene10163	gene10198	gene1029	gene10295	gene10300	gene10317	gene10318	gene10322	gene10353	gene10411	gene1042	gene10434	gene10593	gene1064	gene10680	gene10687	gene10688	gene10695	gene10762	gene10823	gene10844	gene10910	gene11048	gene11071	gene11083	gene1119	gene1121	gene11239	gene11242	gene11252	gene11265	gene11372	gene11382	gene11399	gene11427	gene11447	gene11454	gene11464	gene11465	gene11478	gene11523	gene11529	gene11632	gene11664	gene1172	gene11752
gene1065	0.850521	0.820135	0.873632	0.255988	0.114849	0.318324	0.28449	0.746684	0.154848	0.199169	0.0554391	0.934315	0.488893	0.590585	0.625716	0.390815	0.737015	0.949272	0.861257	0.732027	0.358227	0.894297	0.0643722	0.191161	0.63235	0.165585	0.109072	0.366405	0.855789	0.328072	0.879797	0.0640351	0.0643722	0.947487	0.598376	0.177435	0.0643722	0.720351	0.777577	0.773004	0.828803	0.896246	0.216716	0.662892	0.311594	0.618514	0.916395	0.0643722	0.0659143
gene11268	0.707117	0.744035	0.550364	0.989516	0.233227	0.116661	0.474728	0.616926	-0.000944897	0.460936	-0.108708	0.612343	0.967407	0.889233	0.606278	0.687253	0.576209	0.533093	0.724526	0.827263	0.23845	0.233993	0.964508	0.105093	0.863043	0.990642	-0.0814175	0.317214	0.740479	0.420683	0.576059	0.972041	0.964508	0.526121	0.461219	0.0791058	0.964508	0.740223	0.827135	0.832608	0.74727	0.562264	0.984751	0.504759	0.978732	0.909938	0.412429	0.964508	0.963961
gene11577	0.263429	0.264996	0.716597	0.329435	0.954449	0.914973	0.97794	0.831159	0.881777	0.985782	0.821417	0.473873	0.571074	0.715494	0.920837	0.954457	0.859804	0.372572	0.369715	0.656121	0.964797	0.651191	0.292392	0.92809	0.740308	0.408832	0.839945	0.97592	0.435589	0.996826	0.691332	0.39462	0.292392	0.237283	0.943686	0.914503	0.292392	0.797258	0.52734	0.444061	0.617611	0.671229	0.53198	0.902461	0.284543	0.648853	0.657582	0.292392	0.29283
gene11655	0.332987	0.335791	0.761234	0.376723	0.922879	0.893584	0.97067	0.85915	0.847827	0.967377	0.781092	0.536355	0.615801	0.755377	0.939653	0.962145	0.893586	0.441235	0.440992	0.70507	0.949242	0.68659	0.328927	0.898167	0.781202	0.446552	0.799781	0.960912	0.501845	0.987123	0.734168	0.426397	0.328927	0.305481	0.955591	0.885569	0.328927	0.838418	0.586371	0.509958	0.675329	0.718925	0.564203	0.91675	0.333653	0.695064	0.701519	0.328927	0.328205
gene12282	-0.141949	-0.147878	0.432069	-0.0451612	0.985924	0.948853	0.895318	0.572555	0.983237	0.920696	0.974259	0.11576	0.190143	0.361558	0.69742	0.761812	0.613873	0.0282617	-0.0306678	0.284843	0.944207	0.468631	-0.0370283	0.985021	0.393668	0.0661737	0.975908	0.923903	0.0435482	0.919178	0.390319	0.0780085	-0.0370283	-0.125879	0.787147	0.986245	-0.0370283	0.487898	0.129599	0.03165	0.253966	0.371345	0.206644	0.70436	-0.0994993	0.275433	0.407214	-0.0370283	-0.0370073
gene1271	0.161072	0.151273	0.697724	0.0920882	0.952011	0.985383	0.950814	0.782919	0.957853	0.9285	0.916762	0.424519	0.369286	0.551969	0.860254	0.860282	0.830855	0.356459	0.279312	0.520898	0.992149	0.722149	0.0407234	0.969925	0.59799	0.167946	0.929638	0.970528	0.344906	0.970784	0.649328	0.147367	0.0407234	0.195298	0.937166	0.975463	0.0407234	0.715717	0.396294	0.310385	0.533546	0.647177	0.315038	0.863725	0.0554721	0.487119	0.681933	0.0407234	0.0378898
gene12827	0.103712	0.0827059	0.664576	-0.0578763	0.935325	0.990934	0.888607	0.742561	0.974212	0.880703	0.940847	0.385083	0.249891	0.455552	0.813537	0.778829	0.779999	0.318473	0.208936	0.443028	0.986007	0.741212	-0.118327	0.976561	0.504459	0.0125523	0.959653	0.960904	0.275034	0.931094	0.624714	-0.0120319	-0.118327	0.174641	0.903992	0.976441	-0.118327	0.638921	0.31577	0.221913	0.459908	0.615191	0.164746	0.84471	-0.08557	0.384238	0.672791	-0.118327	-0.117746
gene14082	-0.0230861	-0.0294636	0.542385	0.0196177	0.986669	0.974695	0.933748	0.663433	0.984858	0.939104	0.963005	0.238934	0.270926	0.446849	0.772377	0.816129	0.709707	0.158247	0.0940399	0.385116	0.975123	0.570491	0.00584889	0.991182	0.484668	0.119242	0.968088	0.953878	0.165671	0.954066	0.496174	0.119176	0.00584889	-0.00294441	0.857669	0.994988	0.00584889	0.58823	0.240049	0.146454	0.370927	0.484561	0.263561	0.775318	-0.0296454	0.36849	0.518734	0.00584889	0.00432064
gene14180	0.0617565	0.0560319	0.600094	0.104568	0.992091	0.971708	0.95621	0.72547	0.968554	0.966901	0.933845	0.310836	0.360946	0.531213	0.8275	0.866333	0.75915	0.219787	0.172436	0.469877	0.986338	0.602167	0.0829697	0.987206	0.56508	0.19942	0.945994	0.976746	0.245055	0.97876	0.563509	0.194593	0.0829697	0.0700987	0.893811	0.983719	0.0829697	0.654226	0.326759	0.232408	0.444716	0.546102	0.341388	0.827686	0.0588504	0.454644	0.566439	0.0829697	0.0831077
gene14470	-0.0899122	-0.105017	0.502235	-0.124186	0.966359	0.977991	0.876138	0.612304	0.999528	0.887501	0.987938	0.190843	0.148534	0.344104	0.717391	0.734088	0.657399	0.117285	0.0206823	0.298504	0.964073	0.580523	-0.143977	0.99357	0.38635	-0.0285605	0.994512	0.934866	0.0913435	0.912182	0.457696	-0.0309694	-0.143977	-0.036231	0.820487	0.99664	-0.143977	0.509795	0.152543	0.0544663	0.294686	0.444159	0.120044	0.741976	-0.16771	0.261299	0.501538	-0.143977	-0.143895
gene15523	0.0583513	0.0445145	0.62065	-0.00239004	0.969559	0.994652	0.927768	0.724541	0.985358	0.923334	0.95451	0.32907	0.279784	0.469987	0.8097	0.816122	0.760342	0.254537	0.168458	0.432147	0.991001	0.667514	-0.0412926	0.989913	0.514487	0.082852	0.968766	0.968644	0.239595	0.955188	0.577845	0.0691672	-0.0412926	0.101714	0.896594	0.992746	-0.0412926	0.632926	0.296753	0.20176	0.434096	0.567686	0.235711	0.825193	-0.0379573	0.397185	0.61136	-0.0412926	-0.0417263
gene15564	0.978952	0.987806	0.790644	0.806375	0.0437567	0.0889266	0.315278	0.729141	-0.0854061	0.251996	-0.210412	0.922216	0.88287	0.860806	0.63559	0.539856	0.69974	0.895923	0.981525	0.916318	0.196125	0.590055	0.677719	0.00597916	0.861597	0.734578	-0.164942	0.254842	0.972912	0.3033	0.81606	0.662032	0.677719	0.913652	0.509125	-0.0193653	0.677719	0.816886	0.969588	0.990166	0.926678	0.821204	0.730824	0.588035	0.836719	0.904267	0.72914	0.677719	0.677582
gene15687	0.656947	0.614021	0.767464	-0.04633	0.103185	0.35795	0.208536	0.620879	0.22268	0.115828	0.152931	0.791117	0.214572	0.35432	0.501999	0.239216	0.628234	0.831948	0.672571	0.51689	0.355418	0.89101	-0.238047	0.223574	0.410991	-0.13408	0.198956	0.333779	0.666631	0.265112	0.758008	-0.233802	-0.238047	0.816162	0.529408	0.222547	-0.238047	0.551857	0.557993	0.547251	0.648806	0.7833	-0.0668747	0.569583	0.0128714	0.375178	0.855094	-0.238047	-0.237559
gene17448	-0.220817	-0.235535	0.383976	-0.214965	0.948378	0.946583	0.823714	0.503382	0.992585	0.845673	0.997663	0.0600416	0.0388744	0.231296	0.622465	0.656779	0.552237	-0.0111416	-0.111851	0.175343	0.921374	0.481434	-0.214337	0.976552	0.271117	-0.109692	0.997382	0.886494	-0.0411329	0.860175	0.337417	-0.10083	-0.214337	-0.164511	0.737977	0.982077	-0.214337	0.394324	0.0232911	-0.0757178	0.166198	0.322437	0.0350566	0.650617	-0.263801	0.143256	0.387878	-0.214337	-0.214216
gene17490	0.340943	0.32967	0.804673	0.239572	0.922542	0.95144	0.956316	0.892696	0.89248	0.942775	0.825142	0.572031	0.527427	0.697277	0.944314	0.923381	0.906884	0.487797	0.438001	0.675464	0.982114	0.78496	0.16731	0.926403	0.736338	0.299301	0.855372	0.983722	0.504164	0.981605	0.77882	0.265967	0.16731	0.359319	0.982794	0.917346	0.16731	0.826399	0.562129	0.476239	0.670948	0.765261	0.441208	0.947547	0.217328	0.640319	0.775401	0.16731	0.168498
gene18265	0.967172	0.974889	0.85586	0.808056	0.181901	0.228578	0.450396	0.820471	0.052126	0.384712	-0.0762184	0.943516	0.91669	0.915981	0.736359	0.654731	0.787486	0.906431	0.982719	0.959427	0.329083	0.656104	0.680391	0.141072	0.923371	0.752499	-0.0280734	0.384246	0.987575	0.43383	0.874665	0.680822	0.680391	0.902234	0.623867	0.119138	0.680391	0.891961	0.993497	0.999305	0.968278	0.878939	0.775112	0.687707	0.835831	0.951451	0.790491	0.680391	0.680075
gene18267	0.559462	0.579141	0.763177	0.736185	0.727322	0.651357	0.879896	0.870819	0.560593	0.870202	0.462911	0.643404	0.881142	0.931954	0.914082	0.976407	0.862826	0.540372	0.635362	0.86433	0.742789	0.55441	0.695444	0.643764	0.936697	0.785435	0.491036	0.789807	0.686994	0.858355	0.759067	0.764021	0.695444	0.449288	0.853989	0.624286	0.695444	0.91153	0.785924	0.735873	0.803611	0.74168	0.865828	0.848124	0.706366	0.904322	0.654658	0.695444	0.69505
gene19458	0.553966	0.600522	0.310527	0.981007	0.0924565	-0.0764523	0.31329	0.393542	-0.163547	0.319006	-0.251571	0.401322	0.872778	0.744952	0.396762	0.528939	0.347349	0.324113	0.554575	0.655601	0.0438277	-0.0307692	1	-0.0602757	0.702494	0.989787	-0.235686	0.128217	0.563097	0.245284	0.342827	0.99337	1	0.3388	0.23848	-0.0858513	1	0.539195	0.663328	0.682113	0.55009	0.325356	0.952402	0.281561	0.962864	0.769835	0.158464	1	0.999433
gene19958	0.524704	0.49912	0.921797	0.153029	0.728301	0.860154	0.800142	0.91965	0.760627	0.746109	0.683218	0.756938	0.47491	0.661035	0.910326	0.78425	0.941871	0.71568	0.608444	0.714271	0.880707	0.962639	0.018485	0.784481	0.715345	0.160394	0.722028	0.869249	0.653422	0.841377	0.894029	0.0938362	0.018485	0.607027	0.954376	0.779873	0.018485	0.846306	0.648065	0.581803	0.771796	0.898021	0.2932	0.939338	0.158896	0.627761	0.938325	0.018485	0.0184745
gene20669	-0.151046	-0.164881	0.444174	-0.148114	0.966334	0.964158	0.861056	0.565382	0.997316	0.880266	0.992344	0.126031	0.112565	0.303444	0.678803	0.710584	0.608709	0.0498001	-0.0421376	0.2481	0.947017	0.523012	-0.155077	0.988747	0.342946	-0.0455426	0.996319	0.917732	0.0300419	0.89557	0.400351	-0.0411277	-0.155077	-0.102512	0.784322	0.991954	-0.155077	0.460852	0.0974191	-0.00210876	0.236353	0.384375	0.101393	0.702657	-0.194771	0.217682	0.441169	-0.155077	-0.154673
gene20740	0.0412736	0.0163051	0.621306	-0.180912	0.884994	0.980921	0.833837	0.676842	0.966884	0.803416	0.946679	0.338414	0.12666	0.341393	0.737299	0.689635	0.727549	0.297298	0.151442	0.344376	0.950239	0.742384	-0.245442	0.948433	0.400989	-0.115563	0.959297	0.905493	0.213476	0.870024	0.56645	-0.142064	-0.245442	0.140557	0.855783	0.962192	-0.245442	0.564767	0.227473	0.13884	0.393333	0.570937	0.0427719	0.775367	-0.203636	0.276512	0.652679	-0.245442	-0.247801
gene21563	-0.147114	-0.166239	0.457962	-0.217979	0.939941	0.96622	0.828885	0.558973	0.996844	0.840131	0.994557	0.142874	0.0589143	0.262719	0.662737	0.667931	0.607772	0.077876	-0.0385958	0.225582	0.94077	0.567555	-0.238007	0.980859	0.308017	-0.124276	0.999153	0.90394	0.0300496	0.870614	0.411096	-0.126326	-0.238007	-0.0743161	0.779391	0.986382	-0.238007	0.444401	0.0810984	-0.0170612	0.231283	0.399327	0.024976	0.697754	-0.259373	0.178755	0.471606	-0.238007	-0.237872
gene21950	0.326207	0.3153	0.805374	0.210919	0.918639	0.960445	0.955871	0.881019	0.902882	0.930508	0.840183	0.567855	0.498532	0.673016	0.934055	0.910195	0.910166	0.493938	0.432196	0.655764	0.984811	0.798913	0.136723	0.93067	0.716558	0.269768	0.865202	0.977591	0.495609	0.978143	0.769862	0.235867	0.136723	0.352623	0.983707	0.927891	0.136723	0.819846	0.544788	0.462319	0.66531	0.763895	0.41263	0.935971	0.185974	0.6174	0.782365	0.136723	0.135765
gene22446	0.553966	0.600522	0.310527	0.981007	0.0924565	-0.0764523	0.31329	0.393542	-0.163547	0.319006	-0.251571	0.401322	0.872778	0.744952	0.396762	0.528939	0.347349	0.324113	0.554575	0.655601	0.0438277	-0.0307692	1	-0.0602757	0.702494	0.989787	-0.235686	0.128217	0.563097	0.245284	0.342827	0.99337	1	0.3388	0.23848	-0.0858513	1	0.539195	0.663328	0.682113	0.55009	0.325356	0.952402	0.281561	0.962864	0.769835	0.158464	1	0.999433
gene23316	0.681589	0.708764	0.72207	0.888576	0.520072	0.431613	0.726839	0.808093	0.318407	0.710846	0.208916	0.687136	0.968477	0.964028	0.821893	0.885238	0.784086	0.593196	0.732707	0.903006	0.541492	0.457114	0.846014	0.416185	0.956196	0.912762	0.239662	0.605041	0.7688	0.690738	0.731913	0.887764	0.846014	0.538739	0.71896	0.392738	0.846014	0.888057	0.861331	0.835928	0.835825	0.716652	0.957095	0.738543	0.869261	0.959775	0.598273	0.846014	0.845535
gene24458	0.551866	0.507547	0.784197	-0.127925	0.268771	0.524457	0.345075	0.662276	0.406033	0.251071	0.346218	0.739963	0.166618	0.338953	0.56949	0.326732	0.684191	0.774828	0.591233	0.485704	0.506117	0.934845	-0.309283	0.39516	0.404906	-0.190879	0.386759	0.470555	0.59859	0.400491	0.758882	-0.283539	-0.309283	0.7223	0.629742	0.401963	-0.309283	0.573611	0.49849	0.470965	0.621569	0.786283	-0.0952763	0.63955	-0.0799692	0.344436	0.875539	-0.309283	-0.310293
gene26161	0.772891	0.741234	0.929755	0.200688	0.314055	0.519582	0.46222	0.831554	0.367323	0.373326	0.273237	0.916443	0.476786	0.615216	0.736409	0.522021	0.835094	0.921967	0.810625	0.739575	0.545812	0.971182	0.0158411	0.394347	0.667668	0.136694	0.323277	0.541167	0.821208	0.503362	0.91933	0.0402695	0.0158411	0.878839	0.741024	0.388336	0.0158411	0.784968	0.75387	0.729802	0.839995	0.937777	0.221893	0.774194	0.2451	0.627115	0.973196	0.0158411	0.0158321
gene26650	-0.185617	-0.204026	0.424347	-0.243677	0.932588	0.958075	0.815938	0.526099	0.994728	0.825753	0.997908	0.105245	0.0254751	0.227668	0.633272	0.645321	0.578797	0.043846	-0.075314	0.187625	0.927352	0.539732	-0.257689	0.974269	0.273477	-0.14716	0.999227	0.886721	-0.00704325	0.854715	0.374009	-0.145932	-0.257689	-0.112121	0.755812	0.982852	-0.257689	0.412126	0.0427098	-0.0544611	0.195525	0.364369	0.00166944	0.667356	-0.286913	0.143558	0.439752	-0.257689	-0.258272
gene26810	0.55341	0.550908	0.883497	0.493378	0.825494	0.818242	0.915892	0.958587	0.732101	0.911867	0.637915	0.721057	0.747743	0.876396	0.99672	0.969843	0.961189	0.622356	0.634684	0.855947	0.894764	0.78235	0.409406	0.80105	0.898451	0.53208	0.675763	0.926293	0.689227	0.942491	0.879344	0.490981	0.409406	0.527451	0.975083	0.774755	0.409406	0.937354	0.762679	0.69279	0.825155	0.85714	0.639335	0.98114	0.472438	0.830795	0.823395	0.409406	0.4125
gene26893	0.739239	0.701132	0.672613	0.0445753	-0.156185	0.0961009	-0.00772941	0.49935	-0.0573772	-0.106702	-0.132538	0.789277	0.233275	0.315287	0.343732	0.076193	0.485509	0.846709	0.721968	0.490413	0.102207	0.757381	-0.147199	-0.0494888	0.360076	-0.0719958	-0.0839273	0.0935727	0.698366	0.0348512	0.678373	-0.174623	-0.147199	0.876084	0.333921	-0.052612	-0.147199	0.460943	0.574476	0.590468	0.621192	0.706698	-0.0430851	0.400525	0.119588	0.362505	0.754548	-0.147199	-0.146404
gene26930	-0.265576	-0.274897	0.331718	-0.18613	0.95092	0.928792	0.829643	0.467028	0.981481	0.852424	0.990712	0.00347502	0.0422574	0.219999	0.594695	0.659565	0.515352	-0.0698641	-0.154503	0.146615	0.901939	0.410133	-0.168177	0.964849	0.256558	-0.0713991	0.98591	0.867581	-0.0816812	0.853448	0.282227	-0.0538511	-0.168177	-0.228465	0.708774	0.973965	-0.168177	0.368027	-0.00823955	-0.105815	0.128941	0.268269	0.0714197	0.611259	-0.23999	0.1327	0.324689	-0.168177	-0.169109
gene27772	0.267381	0.258452	0.739014	0.236717	0.957235	0.937463	0.948837	0.846115	0.905775	0.971057	0.844523	0.494295	0.516912	0.684713	0.92723	0.921471	0.862247	0.388878	0.361557	0.645023	0.985151	0.710843	0.183371	0.950208	0.711479	0.308144	0.872256	0.998239	0.428455	0.991757	0.725229	0.285991	0.183371	0.271986	0.954167	0.927481	0.183371	0.780645	0.513446	0.421649	0.607187	0.695934	0.436558	0.933801	0.201016	0.611908	0.697982	0.183371	0.187632
gene28829	0.362762	0.325448	0.808881	-0.120746	0.665444	0.847965	0.683651	0.780472	0.771039	0.621689	0.72024	0.62787	0.217048	0.430036	0.764978	0.606994	0.814914	0.614604	0.444293	0.508283	0.83041	0.942619	-0.25776	0.76285	0.49647	-0.117896	0.752931	0.793244	0.484942	0.736636	0.769862	-0.184451	-0.25776	0.502544	0.853734	0.769173	-0.25776	0.671241	0.446602	0.379554	0.599867	0.782525	0.0225869	0.822533	-0.107788	0.394955	0.868438	-0.25776	-0.258522
gene28857	0.83959	0.846146	0.920826	0.75663	0.508398	0.517843	0.716493	0.945028	0.372514	0.678663	0.2498	0.896415	0.931286	0.983518	0.917412	0.870493	0.924077	0.822339	0.887536	0.990217	0.61861	0.736136	0.647656	0.462261	0.995204	0.74597	0.295854	0.67042	0.917653	0.714513	0.931421	0.687131	0.647656	0.77485	0.833572	0.43583	0.647656	0.98452	0.964137	0.934626	0.972184	0.921766	0.80821	0.874255	0.760546	0.982873	0.844204	0.647656	0.648921
gene28858	0.782315	0.812656	0.668796	0.965503	0.284534	0.207245	0.537027	0.719002	0.0724624	0.507721	-0.0435171	0.719322	0.989049	0.938479	0.695672	0.742708	0.682522	0.645582	0.807583	0.897145	0.324314	0.376478	0.91425	0.175517	0.923183	0.959071	-0.01069	0.396274	0.825713	0.489884	0.688904	0.927127	0.91425	0.62731	0.562506	0.151852	0.91425	0.827959	0.897389	0.897778	0.838678	0.680031	0.970062	0.604157	0.961353	0.959511	0.544771	0.91425	0.913271
gene29220	-0.184518	-0.202183	0.42072	-0.222236	0.943902	0.957603	0.824419	0.531861	0.995516	0.841838	0.996725	0.101155	0.0451875	0.244239	0.641849	0.660058	0.578146	0.0326641	-0.0773113	0.198492	0.931373	0.526028	-0.232589	0.979073	0.286981	-0.123011	0.999876	0.895784	-0.00708053	0.864203	0.375004	-0.120007	-0.232589	-0.118415	0.75818	0.98422	-0.232589	0.417084	0.0502062	-0.0491999	0.196566	0.360945	0.0250611	0.674941	-0.266071	0.158228	0.430501	-0.232589	-0.23215
gene29914	0.294694	0.294091	0.753891	0.311889	0.939836	0.939172	0.99136	0.859205	0.887478	0.970825	0.825033	0.512622	0.56012	0.708136	0.927396	0.954701	0.884881	0.428175	0.404118	0.659638	0.970441	0.699601	0.263715	0.922024	0.743824	0.385929	0.844953	0.970221	0.471697	0.994066	0.717316	0.364894	0.263715	0.280606	0.964711	0.921199	0.263715	0.81991	0.542467	0.461656	0.647792	0.709998	0.52403	0.906843	0.277562	0.653007	0.705275	0.263715	0.261607
gene30967	-0.223558	-0.235394	0.375249	-0.180029	0.958526	0.942493	0.837205	0.503543	0.990084	0.862595	0.994191	0.0504794	0.0643878	0.249809	0.627762	0.675456	0.550988	-0.0255966	-0.113936	0.184913	0.921536	0.457421	-0.172689	0.977654	0.286698	-0.0705774	0.993053	0.890079	-0.0419819	0.869866	0.329719	-0.0583615	-0.172689	-0.179494	0.737819	0.982291	-0.172689	0.400794	0.0302251	-0.0688181	0.167622	0.313108	0.0721893	0.649924	-0.23191	0.161062	0.370893	-0.172689	-0.172592
gene30999	0.615507	0.612599	0.918308	0.519069	0.780212	0.794323	0.897612	0.978487	0.691736	0.877051	0.591984	0.774989	0.770931	0.894331	0.998839	0.960468	0.979291	0.686836	0.694742	0.885343	0.867978	0.813864	0.423499	0.759371	0.920072	0.547223	0.631774	0.89731	0.74591	0.916771	0.911411	0.499218	0.423499	0.592772	0.975043	0.737491	0.423499	0.962968	0.805846	0.742351	0.869038	0.896194	0.654372	0.980413	0.505599	0.858797	0.861954	0.423499	0.425344
gene31301	0.923987	0.924064	0.929486	0.732414	0.362886	0.415294	0.594104	0.922086	0.246557	0.541156	0.117643	0.955542	0.90401	0.946762	0.853591	0.766513	0.883136	0.900381	0.950224	0.984917	0.508246	0.759413	0.600284	0.331543	0.961779	0.694908	0.172228	0.559939	0.971497	0.592123	0.947389	0.622309	0.600284	0.879603	0.762669	0.306252	0.600284	0.954365	0.988751	0.970182	0.988167	0.942819	0.749963	0.82098	0.757954	0.96389	0.870717	0.600284	0.602352
gene31361	0.548812	0.595251	0.323438	0.979991	0.123784	-0.0467035	0.341668	0.41114	-0.132555	0.348321	-0.220807	0.404157	0.878892	0.756307	0.418503	0.553108	0.366248	0.324074	0.552951	0.664273	0.0734868	-0.0169744	0.999494	-0.0291837	0.714781	0.992434	-0.204925	0.157291	0.563845	0.274336	0.354433	0.996523	0.999494	0.333876	0.262982	-0.0547339	0.999494	0.554243	0.666999	0.682685	0.557565	0.336316	0.959417	0.303396	0.960029	0.778422	0.170414	0.999494	0.998928
gene31395	-0.118634	-0.13072	0.469178	-0.102602	0.977142	0.966353	0.879413	0.591654	0.996314	0.901039	0.986612	0.154409	0.157686	0.3457	0.707298	0.740644	0.635506	0.0732046	-0.00864367	0.287929	0.957757	0.533986	-0.110864	0.994242	0.382885	-0.000377404	0.991411	0.933112	0.0632565	0.914783	0.427626	0.00333523	-0.110864	-0.0782259	0.804582	0.994479	-0.110864	0.494135	0.136236	0.0371424	0.270478	0.409768	0.143649	0.727409	-0.151367	0.259315	0.459525	-0.110864	-0.110246
gene31709	-0.0842562	-0.0995255	0.50375	-0.113609	0.970606	0.976647	0.877991	0.618163	0.998253	0.894564	0.984918	0.193478	0.160213	0.354837	0.723726	0.74088	0.658516	0.115524	0.0234356	0.307584	0.965884	0.577438	-0.132862	0.995035	0.395246	-0.0175386	0.99334	0.940162	0.0950273	0.916183	0.462966	-0.0197452	-0.132862	-0.0333469	0.822502	0.99529	-0.132862	0.513872	0.160083	0.060522	0.298016	0.446243	0.130408	0.749112	-0.156689	0.270885	0.500636	-0.132862	-0.13192
gene31769	0.953653	0.935546	0.818616	0.470228	-0.0372918	0.11152	0.174106	0.693319	-0.0624675	0.104074	-0.175372	0.952806	0.630131	0.670194	0.564439	0.354268	0.666137	0.957001	0.941232	0.797443	0.186222	0.755205	0.291736	0.000625893	0.69026	0.366816	-0.119962	0.222234	0.92395	0.207415	0.846079	0.269961	0.291736	0.994268	0.480369	-0.0257797	0.291736	0.714141	0.864826	0.879825	0.859933	0.854125	0.376183	0.577491	0.525547	0.711729	0.827594	0.291736	0.294794
gene3574	0.843613	0.813253	0.757308	0.216473	-0.103067	0.119054	0.0800114	0.596949	-0.0480201	-0.0164972	-0.139583	0.879548	0.398886	0.467809	0.44848	0.199492	0.58245	0.920486	0.832764	0.627995	0.149934	0.786152	0.0247098	-0.0200176	0.506188	0.103289	-0.0888355	0.155435	0.811319	0.116054	0.767044	0.000193276	0.0247098	0.946062	0.413241	-0.0291069	0.0247098	0.583923	0.707661	0.724334	0.740352	0.791595	0.127933	0.486593	0.284429	0.514903	0.812717	0.0247098	0.0253401
gene3600	0.850317	0.831895	0.983537	0.432064	0.40363	0.536804	0.575672	0.919796	0.383614	0.509117	0.273054	0.968749	0.686321	0.800984	0.852223	0.68261	0.921807	0.940666	0.895175	0.889312	0.602623	0.940553	0.264286	0.441612	0.837541	0.382739	0.323159	0.622553	0.910346	0.612079	0.983629	0.295092	0.264286	0.896874	0.817583	0.422269	0.264286	0.909215	0.887027	0.860803	0.944793	0.989165	0.455549	0.863137	0.458842	0.804806	0.982153	0.264286	0.265342
gene3802	0.819484	0.82292	0.954463	0.68374	0.541221	0.592233	0.759618	0.96815	0.439754	0.693243	0.322164	0.907627	0.877417	0.948263	0.932241	0.878987	0.95933	0.851977	0.881841	0.964617	0.669341	0.801511	0.566109	0.51219	0.974364	0.674517	0.364693	0.702016	0.914929	0.746227	0.946101	0.611317	0.566109	0.777388	0.877976	0.501175	0.566109	0.997785	0.940508	0.909629	0.978521	0.951226	0.757205	0.890573	0.691298	0.95192	0.894047	0.566109	0.56389
gene3821	0.58222	0.559591	0.948023	0.220464	0.702441	0.833645	0.79954	0.94123	0.722637	0.737917	0.638551	0.799839	0.531188	0.705674	0.924414	0.800704	0.962153	0.760369	0.665165	0.759422	0.86024	0.967809	0.0823888	0.75175	0.758756	0.222666	0.678114	0.852297	0.707733	0.833408	0.920454	0.15355	0.0823888	0.653247	0.957958	0.7479	0.0823888	0.881525	0.701276	0.640593	0.818083	0.927262	0.35075	0.944908	0.228015	0.678912	0.957665	0.0823888	0.081561
gene4171	0.427034	0.394515	0.861989	0.00523475	0.724741	0.868152	0.749998	0.852326	0.78898	0.70715	0.725563	0.681113	0.344091	0.550004	0.850328	0.705466	0.88072	0.644161	0.508641	0.612932	0.87692	0.952218	-0.128411	0.801395	0.606816	0.0136697	0.762309	0.857231	0.552498	0.808755	0.834455	-0.0510703	-0.128411	0.538869	0.913429	0.795296	-0.128411	0.755865	0.540176	0.468856	0.675681	0.835351	0.14792	0.899145	0.0105647	0.507949	0.898361	-0.128411	-0.127051
gene420	0.771103	0.734128	0.745597	0.0942404	-0.0572379	0.180754	0.089782	0.583693	0.0271592	-0.00178462	-0.0549278	0.839733	0.305809	0.40102	0.442613	0.178294	0.575377	0.882537	0.764612	0.568345	0.199182	0.81824	-0.100131	0.0444376	0.445234	-0.0142162	-0.00489295	0.195299	0.746318	0.139003	0.751743	-0.117389	-0.100131	0.901189	0.429365	0.0361081	-0.100131	0.546296	0.637198	0.645096	0.688587	0.774999	0.0217649	0.497194	0.161416	0.438826	0.817933	-0.100131	-0.0987583
gene4902	0.586851	0.571725	0.93372	0.364341	0.781876	0.835577	0.863874	0.974913	0.737255	0.84561	0.643407	0.778844	0.66035	0.816667	0.986102	0.902043	0.975551	0.698513	0.661589	0.834243	0.895097	0.890742	0.249812	0.792834	0.850779	0.384147	0.68803	0.915055	0.712369	0.905142	0.928204	0.327292	0.249812	0.610163	0.983324	0.76918	0.249812	0.92459	0.753534	0.682833	0.835743	0.91147	0.501689	0.995631	0.359642	0.775807	0.906686	0.249812	0.253601
gene5176	0.956537	0.962946	0.867414	0.808733	0.235306	0.266945	0.485762	0.846088	0.0969115	0.435933	-0.0331871	0.940944	0.931982	0.939648	0.771933	0.691552	0.807409	0.890203	0.970981	0.97693	0.374136	0.666044	0.683445	0.191166	0.944059	0.759515	0.0181407	0.435284	0.980436	0.47895	0.892889	0.689587	0.683445	0.889869	0.655968	0.162101	0.683445	0.908063	0.998954	0.996648	0.971188	0.888334	0.785451	0.72817	0.833579	0.966507	0.797896	0.683445	0.685254
gene5278	0.174601	0.197614	0.513922	0.522814	0.876701	0.7405	0.922707	0.68383	0.724457	0.950606	0.66912	0.299451	0.649907	0.716304	0.794718	0.932701	0.692237	0.180553	0.267894	0.595594	0.805516	0.346	0.546869	0.784929	0.717063	0.624157	0.677948	0.837367	0.335127	0.902371	0.497669	0.639487	0.546869	0.0601383	0.778768	0.77127	0.546869	0.698294	0.468244	0.397145	0.50498	0.470855	0.718232	0.732678	0.46471	0.657363	0.403431	0.546869	0.546559
gene6166	0.0621723	0.0766534	0.496646	0.347204	0.95113	0.840087	0.949722	0.665512	0.842974	0.97933	0.802468	0.237019	0.513988	0.618058	0.787826	0.909575	0.685818	0.123393	0.165579	0.505305	0.883672	0.391355	0.369391	0.885557	0.628988	0.457605	0.808493	0.898973	0.238179	0.943309	0.470931	0.473768	0.369391	-0.013751	0.807732	0.876473	0.369391	0.646958	0.362117	0.278737	0.429799	0.445321	0.570906	0.746338	0.287023	0.546724	0.410137	0.369391	0.369182
gene6168	-0.079476	-0.0762135	0.447578	0.113284	0.990184	0.915984	0.930928	0.606335	0.941828	0.960941	0.921715	0.146811	0.319283	0.463584	0.735808	0.831455	0.639743	0.045849	0.0305315	0.366528	0.930718	0.424523	0.132175	0.960069	0.486384	0.228862	0.924022	0.924916	0.105856	0.94161	0.411684	0.245247	0.132175	-0.104251	0.79857	0.957186	0.132175	0.548222	0.2118	0.117894	0.31359	0.388963	0.359685	0.721649	0.0539691	0.381076	0.395085	0.132175	0.1321
gene6406	0.596397	0.622499	0.691679	0.843096	0.608716	0.501916	0.783128	0.806318	0.405356	0.783402	0.302048	0.620763	0.935956	0.943937	0.838464	0.920448	0.776831	0.513137	0.650724	0.866463	0.607072	0.434604	0.814723	0.50034	0.935338	0.884699	0.332845	0.670683	0.69657	0.7511	0.702689	0.867845	0.814723	0.452533	0.745436	0.474742	0.814723	0.868359	0.804474	0.766059	0.784381	0.679708	0.941333	0.759543	0.818148	0.927533	0.564966	0.814723	0.815778
gene8208	-0.0765039	-0.0952615	0.520964	-0.168372	0.943598	0.983216	0.858921	0.61597	0.99754	0.857198	0.98675	0.213018	0.114996	0.318523	0.708699	0.707747	0.663323	0.151157	0.0344783	0.287008	0.959297	0.619911	-0.199221	0.984004	0.367191	-0.0799417	0.994116	0.92255	0.103292	0.894366	0.471508	-0.0882393	-0.199221	-0.0053865	0.821981	0.992093	-0.199221	0.506575	0.148617	0.0524388	0.301223	0.464228	0.0738391	0.73901	-0.205592	0.240451	0.532938	-0.199221	-0.200047
gene9642	0.67599	0.634389	0.82845	0.00645099	0.211804	0.447041	0.313408	0.703245	0.312481	0.231243	0.23579	0.826123	0.28822	0.439011	0.599206	0.347567	0.70891	0.848804	0.699804	0.588465	0.455148	0.935267	-0.183451	0.322522	0.494246	-0.0696266	0.284601	0.439939	0.702087	0.37401	0.821225	-0.167864	-0.183451	0.824179	0.622451	0.316069	-0.183451	0.631214	0.611969	0.590667	0.704816	0.839424	0.00761207	0.663805	0.0588751	0.450042	0.903777	-0.183451	-0.181859
gene9756	0.643158	0.605614	0.871597	0.0215939	0.333303	0.573893	0.451127	0.766216	0.437086	0.348007	0.362333	0.824446	0.313163	0.475675	0.674048	0.454483	0.784304	0.849022	0.691384	0.607585	0.567923	0.973513	-0.160022	0.438434	0.540736	-0.0355584	0.405131	0.539928	0.704403	0.490551	0.843867	-0.129248	-0.160022	0.784037	0.719784	0.446437	-0.160022	0.696137	0.617278	0.588842	0.735459	0.872889	0.066792	0.724343	0.0665489	0.484578	0.940795	-0.160022	-0.16235
MSTRG.101471	0.565875	0.611981	0.320999	0.983665	0.0903431	-0.0752168	0.313822	0.401589	-0.164715	0.318064	-0.254	0.413678	0.877943	0.751056	0.402576	0.531115	0.355193	0.337184	0.566284	0.664088	0.045405	-0.0197393	0.999896	-0.0611228	0.709172	0.990757	-0.237405	0.129814	0.574456	0.246293	0.353409	0.992852	0.999896	0.352272	0.243849	-0.0867786	0.999896	0.547045	0.673065	0.692148	0.560313	0.336346	0.953693	0.287946	0.966549	0.776679	0.169827	0.999896	0.999329
MSTRG.10164	0.701997	0.662662	0.845814	0.0443058	0.208934	0.448436	0.330858	0.721401	0.305106	0.237777	0.225216	0.847186	0.319002	0.463439	0.611761	0.368019	0.726329	0.873484	0.728439	0.610705	0.454554	0.940225	-0.146082	0.314799	0.520517	-0.0320555	0.273641	0.438064	0.731382	0.38064	0.834369	-0.131158	-0.146082	0.842883	0.634118	0.312966	-0.146082	0.656657	0.638627	0.619949	0.732153	0.857422	0.0479975	0.668498	0.0982772	0.47986	0.917165	-0.146082	-0.145864
MSTRG.10183	0.349546	0.339666	0.805716	0.264469	0.924987	0.942653	0.957787	0.895533	0.885601	0.950239	0.816683	0.575858	0.548977	0.71559	0.951684	0.933101	0.910482	0.48681	0.446131	0.690659	0.980543	0.776948	0.194045	0.924555	0.751405	0.324675	0.846832	0.986356	0.511481	0.985886	0.78297	0.292429	0.194045	0.361458	0.983367	0.91199	0.194045	0.834266	0.575525	0.489996	0.678782	0.766455	0.461732	0.953197	0.239437	0.656749	0.771391	0.194045	0.195735
MSTRG.102458	0.13224	0.109558	0.689327	-0.0779648	0.901237	0.989972	0.876809	0.750787	0.959569	0.845308	0.925716	0.417603	0.231883	0.439309	0.804362	0.758587	0.791413	0.367879	0.240194	0.43976	0.971912	0.778548	-0.149296	0.952695	0.496466	-0.0154989	0.944063	0.936923	0.30415	0.908933	0.639987	-0.0463801	-0.149296	0.215563	0.905648	0.962449	-0.149296	0.6472	0.325053	0.236404	0.480846	0.641882	0.143274	0.834622	-0.0980898	0.377927	0.70814	-0.149296	-0.151047
MSTRG.102493	0.11075	0.100564	0.651862	0.0820203	0.978286	0.986024	0.951213	0.760321	0.971054	0.951228	0.932232	0.36917	0.357715	0.538698	0.848136	0.861304	0.794177	0.286047	0.220705	0.494721	0.996608	0.670546	0.04328	0.986775	0.578319	0.166911	0.947999	0.983112	0.291441	0.977681	0.613771	0.153035	0.04328	0.1368	0.919123	0.984786	0.04328	0.681793	0.358886	0.265397	0.485209	0.600227	0.313728	0.855656	0.0435536	0.466107	0.629569	0.04328	0.0432555
MSTRG.104044	0.41844	0.388363	0.862168	0.00802302	0.725642	0.87969	0.767358	0.849557	0.796593	0.70745	0.735713	0.676426	0.338309	0.541545	0.845505	0.71138	0.886394	0.649478	0.508714	0.602292	0.8793	0.951887	-0.123409	0.802416	0.603235	0.018638	0.767855	0.851311	0.552699	0.812513	0.823369	-0.0451927	-0.123409	0.528533	0.918325	0.805902	-0.123409	0.760811	0.533153	0.465314	0.678214	0.833749	0.158001	0.886109	0.0124298	0.504502	0.899172	-0.123409	-0.124801
MSTRG.104121	0.529641	0.506191	0.916798	0.210084	0.76396	0.849742	0.811402	0.93027	0.763947	0.791695	0.682141	0.75179	0.532499	0.715306	0.941979	0.820891	0.948249	0.685298	0.607649	0.755885	0.896641	0.934168	0.0836495	0.806363	0.756542	0.222797	0.723647	0.903096	0.653032	0.871858	0.905978	0.161308	0.0836495	0.594068	0.962655	0.784164	0.0836495	0.861287	0.675337	0.603746	0.778297	0.892472	0.341512	0.972938	0.206208	0.669011	0.917176	0.0836495	0.0874233
MSTRG.104740	0.0676118	0.0444786	0.639526	-0.116024	0.921815	0.985112	0.860872	0.70926	0.975721	0.853308	0.948679	0.356756	0.194756	0.40668	0.78226	0.7393	0.753419	0.295562	0.173712	0.399727	0.974818	0.73656	-0.176833	0.972567	0.457257	-0.0468037	0.965047	0.944596	0.237561	0.908608	0.597381	-0.071027	-0.176833	0.150785	0.881329	0.973587	-0.176833	0.600664	0.272558	0.179207	0.422715	0.58918	0.10411	0.819743	-0.144439	0.333517	0.656573	-0.176833	-0.176422
MSTRG.10608	0.00459795	-0.0115388	0.581767	-0.0670558	0.965707	0.991203	0.901003	0.683772	0.993658	0.903441	0.970272	0.28297	0.218335	0.415172	0.774823	0.776568	0.723299	0.209649	0.11383	0.379229	0.983095	0.64874	-0.102558	0.993472	0.459651	0.0198786	0.982585	0.957514	0.184155	0.936003	0.539242	0.00862874	-0.102558	0.0585629	0.869452	0.995362	-0.102558	0.583783	0.240176	0.143363	0.381201	0.527217	0.171473	0.798083	-0.104343	0.337834	0.579843	-0.102558	-0.102401
MSTRG.108645	0.422297	0.428955	0.768149	0.5213	0.881885	0.81839	0.951014	0.887035	0.758816	0.966223	0.675827	0.578593	0.738185	0.84828	0.956905	0.992401	0.888106	0.463796	0.508357	0.786769	0.895915	0.63669	0.477265	0.829082	0.860991	0.586708	0.705341	0.931741	0.570729	0.964448	0.763077	0.566658	0.477265	0.360363	0.933797	0.803474	0.477265	0.875281	0.674099	0.59905	0.725506	0.734468	0.692025	0.925188	0.485058	0.793424	0.685165	0.477265	0.480178
MSTRG.108900	0.105793	0.0840623	0.666806	-0.0666173	0.930708	0.986968	0.879768	0.740017	0.971893	0.874013	0.938918	0.38887	0.244083	0.452129	0.812107	0.771108	0.780332	0.322367	0.210944	0.442781	0.984129	0.74798	-0.129278	0.975064	0.500613	0.00191274	0.957541	0.95925	0.275451	0.926821	0.627913	-0.023556	-0.129278	0.180259	0.902111	0.973275	-0.129278	0.636334	0.315555	0.222125	0.459873	0.61757	0.151561	0.845868	-0.0950501	0.379551	0.67699	-0.129278	-0.128438
MSTRG.108902	0.264714	0.236844	0.774935	-0.0256676	0.859805	0.953962	0.841292	0.817056	0.90751	0.823077	0.85739	0.537209	0.30729	0.51817	0.854761	0.764756	0.845085	0.478446	0.357035	0.54086	0.958375	0.857761	-0.122668	0.91727	0.570132	0.0167812	0.887688	0.938999	0.415063	0.896317	0.744778	-0.0277012	-0.122668	0.355994	0.930114	0.910783	-0.122668	0.710325	0.434948	0.347599	0.573988	0.736039	0.163476	0.897655	-0.0371095	0.457592	0.795562	-0.122668	-0.120535
MSTRG.108905	0.113908	0.106605	0.642832	0.124197	0.982905	0.978795	0.964573	0.763215	0.961756	0.96556	0.920711	0.361711	0.388276	0.559424	0.851606	0.880807	0.790225	0.27432	0.222244	0.505834	0.991246	0.642651	0.0923145	0.980225	0.596628	0.213042	0.936987	0.981485	0.295386	0.983229	0.606103	0.202179	0.0923145	0.125842	0.916505	0.978598	0.0923145	0.689525	0.369391	0.275851	0.488841	0.591544	0.3601	0.85187	0.0854522	0.48857	0.611623	0.0923145	0.0922622
MSTRG.108992	0.00373143	-0.0168764	0.588538	-0.132202	0.93675	0.990926	0.870411	0.67288	0.989807	0.861956	0.969545	0.292702	0.164645	0.371389	0.753069	0.733827	0.716607	0.231981	0.112821	0.351315	0.972021	0.68318	-0.178482	0.980805	0.422135	-0.0529497	0.981955	0.937964	0.180305	0.908037	0.541417	-0.0697042	-0.178482	0.0791769	0.859807	0.987111	-0.178482	0.564045	0.219455	0.124583	0.371775	0.535118	0.102262	0.784897	-0.163703	0.297524	0.602113	-0.178482	-0.179036
MSTRG.10914	0.561738	0.575129	0.808579	0.667565	0.76125	0.72366	0.916268	0.913001	0.622657	0.8899	0.524956	0.671776	0.842366	0.913713	0.942323	0.989115	0.900544	0.578233	0.641095	0.858291	0.795956	0.629361	0.613941	0.693215	0.930098	0.715807	0.556853	0.831722	0.698171	0.891282	0.79648	0.687489	0.613941	0.475758	0.903082	0.681881	0.613941	0.931534	0.780487	0.724387	0.819309	0.785723	0.817698	0.885195	0.647084	0.888739	0.715952	0.613941	0.612776
MSTRG.111589	0.931835	0.912736	0.783449	0.40891	-0.114777	0.0754958	0.119763	0.639966	-0.108859	0.0170227	-0.214321	0.928724	0.552674	0.586603	0.488938	0.277333	0.61635	0.961055	0.920722	0.725748	0.123543	0.741376	0.227122	-0.0650571	0.61718	0.298132	-0.163286	0.142344	0.900032	0.132178	0.79548	0.198506	0.227122	0.986977	0.425163	-0.0737769	0.227122	0.661045	0.812229	0.836671	0.821724	0.821236	0.314163	0.498731	0.474227	0.643572	0.808249	0.227122	0.22635
MSTRG.111678	0.561227	0.550542	0.927243	0.376477	0.80338	0.861553	0.903068	0.971958	0.761913	0.866461	0.672087	0.759361	0.65956	0.811851	0.986672	0.925063	0.983979	0.687918	0.649122	0.820192	0.910827	0.8785	0.269841	0.810244	0.850959	0.403747	0.709838	0.92119	0.701816	0.926051	0.907143	0.350837	0.269841	0.57691	0.995998	0.798359	0.269841	0.932676	0.739509	0.671485	0.833279	0.901086	0.528595	0.98338	0.367551	0.774913	0.896932	0.269841	0.270149
MSTRG.112298	0.843225	0.868423	0.724558	0.946416	0.261563	0.211642	0.521523	0.755647	0.0642672	0.484664	-0.0572761	0.786724	0.99084	0.950708	0.716581	0.732589	0.717356	0.719487	0.864907	0.929275	0.327693	0.448444	0.87567	0.166526	0.939939	0.927506	-0.0194099	0.398091	0.88015	0.481856	0.746289	0.885276	0.87567	0.706811	0.584367	0.141831	0.87567	0.856693	0.937893	0.939418	0.884382	0.739361	0.94079	0.634454	0.950504	0.975557	0.612178	0.87567	0.875174
MSTRG.113053	0.567075	0.520929	0.730862	-0.150284	0.139897	0.406001	0.21914	0.587463	0.284405	0.124881	0.226389	0.726753	0.122901	0.279229	0.476972	0.215683	0.60267	0.772924	0.589725	0.441254	0.387211	0.88794	-0.336589	0.272191	0.341738	-0.229722	0.268323	0.353921	0.587252	0.277626	0.713033	-0.325727	-0.336589	0.74406	0.527725	0.276987	-0.336589	0.502405	0.473596	0.457054	0.582358	0.74116	-0.151448	0.55249	-0.0934834	0.294236	0.830681	-0.336589	-0.336818
MSTRG.113560	-0.268045	-0.282645	0.336736	-0.243606	0.940251	0.927584	0.798539	0.46075	0.984594	0.829894	0.995294	0.0101756	0.00301968	0.193434	0.587003	0.626803	0.509608	-0.0634048	-0.161758	0.132961	0.901979	0.438997	-0.234766	0.967445	0.230264	-0.134972	0.993176	0.867837	-0.0914193	0.838693	0.292638	-0.121505	-0.234766	-0.212404	0.703242	0.970951	-0.234766	0.349293	-0.0225301	-0.122322	0.116855	0.274321	0.00549134	0.617638	-0.295151	0.101881	0.340794	-0.234766	-0.233929
MSTRG.113583	-0.260996	-0.273171	0.3406	-0.212197	0.948339	0.930826	0.816679	0.469711	0.985211	0.844528	0.99439	0.0133363	0.0274526	0.21253	0.596777	0.647231	0.518351	-0.060954	-0.152326	0.146318	0.905879	0.430769	-0.2	0.969233	0.249083	-0.10097	0.991379	0.872267	-0.0808032	0.850006	0.294447	-0.08604	-0.2	-0.214212	0.711068	0.974732	-0.2	0.36429	-0.00920998	-0.108197	0.128902	0.277743	0.0405278	0.620942	-0.264956	0.12265	0.339025	-0.2	-0.199887
MSTRG.116624	0.54196	0.520643	0.931312	0.227982	0.760946	0.867829	0.840041	0.946294	0.767809	0.79408	0.685108	0.764259	0.541368	0.718305	0.94489	0.838074	0.962966	0.71076	0.626138	0.757041	0.899094	0.942596	0.101424	0.800866	0.767347	0.24202	0.724901	0.896167	0.674479	0.877319	0.907759	0.179352	0.101424	0.602961	0.976392	0.792377	0.101424	0.881616	0.684677	0.616337	0.797977	0.906816	0.373219	0.964738	0.229464	0.682785	0.932217	0.101424	0.102008
MSTRG.116891	0.721345	0.701709	0.989617	0.349588	0.59929	0.728954	0.739896	0.96709	0.5933	0.673546	0.493085	0.895469	0.638046	0.785218	0.926645	0.790771	0.974277	0.857081	0.789035	0.848985	0.773563	0.969286	0.198683	0.637238	0.831671	0.332324	0.539273	0.779781	0.823309	0.769176	0.973823	0.254785	0.198683	0.774202	0.927933	0.62744	0.198683	0.929275	0.813209	0.765268	0.903756	0.980015	0.442076	0.938311	0.366427	0.772776	0.988692	0.198683	0.198571
MSTRG.117631	0.719714	0.738269	0.787935	0.839804	0.558603	0.475078	0.731968	0.86213	0.366077	0.738357	0.251417	0.747708	0.966632	0.990398	0.880003	0.898989	0.83787	0.641187	0.765906	0.947811	0.59902	0.550501	0.777501	0.472379	0.981092	0.856378	0.290058	0.669728	0.800895	0.730156	0.81123	0.822553	0.777501	0.602228	0.772593	0.433189	0.777501	0.921331	0.89662	0.862246	0.872997	0.782924	0.899349	0.819999	0.821148	0.97339	0.675188	0.777501	0.781176
MSTRG.117896	-0.069625	-0.0817096	0.511586	-0.067446	0.980733	0.976361	0.898275	0.63115	0.996029	0.914178	0.980072	0.202204	0.198269	0.386235	0.740011	0.768251	0.672494	0.121103	0.0406738	0.332051	0.970552	0.568381	-0.0830047	0.996919	0.424744	0.0311688	0.987486	0.94754	0.112808	0.931427	0.470204	0.0307012	-0.0830047	-0.0307775	0.83313	0.997249	-0.0830047	0.536121	0.183628	0.0852135	0.317665	0.453689	0.177419	0.757961	-0.113417	0.302919	0.500195	-0.0830047	-0.0825753
MSTRG.118484	0.280552	0.258824	0.784804	0.0652683	0.900457	0.963134	0.890999	0.844375	0.918224	0.881058	0.863123	0.54301	0.38563	0.585497	0.895174	0.829643	0.872202	0.470985	0.376971	0.590166	0.981381	0.83251	-0.0211421	0.93902	0.631183	0.116262	0.892255	0.970788	0.437737	0.941169	0.757255	0.0772275	-0.0211421	0.345589	0.956722	0.92872	-0.0211421	0.752726	0.476407	0.387949	0.604806	0.744074	0.259087	0.925361	0.0457254	0.521578	0.78625	-0.0211421	-0.0189252
MSTRG.118886	0.880492	0.883147	0.954735	0.701219	0.439161	0.501076	0.671659	0.941862	0.339595	0.601555	0.218327	0.946381	0.882538	0.941602	0.890344	0.813597	0.933603	0.899988	0.932729	0.975118	0.585248	0.800625	0.571843	0.415988	0.965044	0.67412	0.262302	0.621424	0.955395	0.663075	0.952038	0.604296	0.571843	0.842745	0.823143	0.401829	0.571843	0.982456	0.969139	0.949494	0.99574	0.958916	0.739839	0.851092	0.71474	0.95382	0.899296	0.571843	0.569854
MSTRG.122064	0.365271	0.360208	0.790329	0.343827	0.925104	0.900744	0.950648	0.889437	0.852579	0.966594	0.779593	0.571304	0.612553	0.765372	0.961387	0.953924	0.903836	0.464896	0.45749	0.727825	0.962547	0.730028	0.282861	0.90831	0.788847	0.406496	0.809613	0.983684	0.520306	0.988139	0.779901	0.379527	0.282861	0.353554	0.968933	0.883175	0.282861	0.843917	0.60648	0.522032	0.687826	0.751957	0.525789	0.957442	0.309712	0.700011	0.738238	0.282861	0.286641
MSTRG.124194	-0.112019	-0.131186	0.484843	-0.181367	0.951736	0.970031	0.842746	0.589623	0.997067	0.861014	0.988897	0.173791	0.100945	0.30421	0.6933	0.695258	0.632552	0.100961	-0.00674026	0.266432	0.953429	0.583168	-0.204526	0.988252	0.346639	-0.0888593	0.997139	0.923436	0.0627446	0.889061	0.444219	-0.092643	-0.204526	-0.0444423	0.80013	0.988262	-0.204526	0.475251	0.120112	0.0201083	0.263474	0.427495	0.0587264	0.72872	-0.222332	0.218665	0.493305	-0.204526	-0.203083
MSTRG.125296	0.993317	0.989282	0.785958	0.646797	-0.0816974	0.0366513	0.18738	0.680723	-0.151577	0.101356	-0.27132	0.944622	0.744397	0.737706	0.547559	0.393561	0.645619	0.949519	0.981535	0.83722	0.116918	0.650376	0.489494	-0.0810034	0.751315	0.549253	-0.220579	0.15993	0.964657	0.182481	0.80862	0.461188	0.489494	0.980976	0.442293	-0.0985254	0.489494	0.741096	0.916502	0.943754	0.889636	0.824548	0.550056	0.524944	0.699714	0.794705	0.764294	0.489494	0.489216
MSTRG.125846	0.736373	0.698046	0.809065	0.0632991	0.0914464	0.336165	0.228769	0.665005	0.186237	0.131299	0.105521	0.850568	0.311207	0.435196	0.539732	0.285751	0.666664	0.887339	0.750532	0.593111	0.345338	0.89634	-0.130632	0.197479	0.488458	-0.0279165	0.153941	0.331942	0.743834	0.276143	0.802521	-0.129766	-0.130632	0.874643	0.54937	0.195046	-0.130632	0.613219	0.640526	0.634395	0.719026	0.828272	0.0344126	0.594735	0.123502	0.462392	0.882537	-0.130632	-0.130558
MSTRG.127132	0.954049	0.938266	0.786066	0.469893	-0.112141	0.0588417	0.129033	0.65042	-0.126307	0.0333106	-0.236134	0.937894	0.603319	0.627168	0.503615	0.302504	0.623197	0.962101	0.940981	0.758087	0.117512	0.720665	0.29277	-0.074117	0.652449	0.36079	-0.18437	0.144086	0.920395	0.140253	0.803036	0.263349	0.29277	0.993012	0.426806	-0.0870907	0.29277	0.681085	0.843138	0.868438	0.841306	0.824764	0.370791	0.506923	0.532344	0.683599	0.799411	0.29277	0.292604
MSTRG.12921	-0.260996	-0.273171	0.3406	-0.212197	0.948339	0.930826	0.816679	0.469711	0.985211	0.844528	0.99439	0.0133363	0.0274526	0.21253	0.596777	0.647231	0.518351	-0.060954	-0.152326	0.146318	0.905879	0.430769	-0.2	0.969233	0.249083	-0.10097	0.991379	0.872267	-0.0808032	0.850006	0.294447	-0.08604	-0.2	-0.214212	0.711068	0.974732	-0.2	0.36429	-0.00920998	-0.108197	0.128902	0.277743	0.0405278	0.620942	-0.264956	0.12265	0.339025	-0.2	-0.199887
MSTRG.129441	-0.276879	-0.290164	0.333569	-0.254251	0.929771	0.930775	0.801112	0.450946	0.984373	0.816542	0.998159	0.00512656	-0.0144159	0.174582	0.573439	0.618139	0.507934	-0.0573548	-0.16389	0.115463	0.895759	0.440582	-0.245207	0.96012	0.216277	-0.145704	0.991957	0.853231	-0.0945491	0.8306	0.279465	-0.132313	-0.245207	-0.218857	0.699547	0.972307	-0.245207	0.345037	-0.0350214	-0.130926	0.113638	0.270117	-0.00155276	0.598818	-0.305568	0.0880695	0.341134	-0.245207	-0.246796
MSTRG.129939	-0.252266	-0.266806	0.354536	-0.237563	0.940778	0.936707	0.808734	0.475109	0.988381	0.832245	0.997701	0.0283269	0.0108413	0.202106	0.597126	0.635519	0.525548	-0.0413471	-0.143474	0.144093	0.908358	0.456992	-0.232149	0.969541	0.241547	-0.130348	0.995464	0.871635	-0.0730972	0.844791	0.306971	-0.118854	-0.232149	-0.195077	0.715991	0.976125	-0.232149	0.365153	-0.00872341	-0.107416	0.134677	0.292243	0.0131861	0.625869	-0.287618	0.113268	0.359897	-0.232149	-0.23217
MSTRG.129974	-0.053729	-0.0771805	0.538887	-0.196289	0.929564	0.975009	0.830889	0.624442	0.989448	0.839195	0.976271	0.238589	0.103999	0.31644	0.713213	0.687406	0.667788	0.17354	0.0498781	0.297199	0.956637	0.651785	-0.237677	0.97922	0.363788	-0.115446	0.988346	0.923959	0.116349	0.882221	0.497913	-0.128867	-0.237677	0.0307498	0.822044	0.979682	-0.237677	0.504851	0.159516	0.0614695	0.30916	0.48464	0.0345348	0.75586	-0.229958	0.235311	0.558153	-0.237677	-0.236275
MSTRG.132258	-0.0932432	-0.112796	0.503674	-0.179635	0.947506	0.970268	0.840858	0.599524	0.995713	0.857111	0.986454	0.195627	0.106997	0.31323	0.702874	0.696105	0.648438	0.12479	0.0142826	0.280712	0.956535	0.605322	-0.208026	0.988193	0.356305	-0.0906321	0.994145	0.925871	0.0813493	0.890683	0.462164	-0.0968801	-0.208026	-0.0217557	0.809282	0.987537	-0.208026	0.48835	0.136026	0.0377115	0.281489	0.446571	0.0545377	0.739435	-0.221468	0.227618	0.514189	-0.208026	-0.206862
MSTRG.132484	-0.260996	-0.273171	0.3406	-0.212197	0.948339	0.930826	0.816679	0.469711	0.985211	0.844528	0.99439	0.0133363	0.0274526	0.21253	0.596777	0.647231	0.518351	-0.060954	-0.152326	0.146318	0.905879	0.430769	-0.2	0.969233	0.249083	-0.10097	0.991379	0.872267	-0.0808032	0.850006	0.294447	-0.08604	-0.2	-0.214212	0.711068	0.974732	-0.2	0.36429	-0.00920998	-0.108197	0.128902	0.277743	0.0405278	0.620942	-0.264956	0.12265	0.339025	-0.2	-0.199887
MSTRG.133080	-0.0966508	-0.115524	0.500295	-0.174195	0.947917	0.978962	0.854216	0.603126	0.997841	0.859974	0.988288	0.19004	0.107123	0.309197	0.69896	0.702916	0.645284	0.12361	0.0109293	0.273283	0.955713	0.597623	-0.200207	0.985081	0.355606	-0.082847	0.996515	0.921564	0.0813119	0.891429	0.454376	-0.0886235	-0.200207	-0.0283157	0.810357	0.990852	-0.200207	0.489837	0.131656	0.0332415	0.280138	0.443372	0.0704585	0.730645	-0.21176	0.228878	0.51033	-0.200207	-0.200094
MSTRG.133200	0.975816	0.970256	0.914548	0.649106	0.175396	0.285817	0.426149	0.844276	0.102959	0.34523	-0.0215466	0.993462	0.809979	0.847842	0.741436	0.601672	0.819348	0.975342	0.993015	0.928932	0.366686	0.785319	0.491032	0.175567	0.870013	0.578931	0.0305826	0.405364	0.995262	0.427339	0.926761	0.492335	0.491032	0.96701	0.657368	0.157956	0.491032	0.883954	0.969	0.971142	0.973989	0.937964	0.616421	0.719983	0.688679	0.88335	0.88564	0.491032	0.490754
MSTRG.134904	0.996138	0.992683	0.838719	0.670213	0.0193235	0.128744	0.284846	0.749781	-0.0584046	0.202384	-0.181752	0.96873	0.788893	0.795941	0.629253	0.484568	0.717174	0.962188	0.995075	0.885542	0.212566	0.697183	0.513948	0.0156982	0.811308	0.583805	-0.130137	0.256397	0.985785	0.281246	0.85873	0.49688	0.513948	0.979496	0.527886	-0.00298028	0.513948	0.805495	0.949389	0.96724	0.931265	0.871776	0.597249	0.604541	0.717229	0.844775	0.810268	0.513948	0.513802
MSTRG.136229	0.989284	0.996232	0.75405	0.783554	-0.0503523	0.0147303	0.233535	0.681084	-0.168716	0.159925	-0.292747	0.912589	0.844207	0.809658	0.565872	0.461499	0.640142	0.899503	0.979163	0.87622	0.11164	0.559319	0.65087	-0.0840677	0.811966	0.700603	-0.245001	0.16805	0.966384	0.213989	0.781038	0.624736	0.65087	0.93019	0.438659	-0.10507	0.65087	0.766375	0.946981	0.974929	0.898146	0.79098	0.692901	0.520296	0.825548	0.864875	0.70102	0.65087	0.650501
MSTRG.136706	0.69786	0.726608	0.711928	0.90669	0.478749	0.388156	0.69224	0.788009	0.274024	0.674991	0.164291	0.692111	0.974535	0.961794	0.799858	0.860194	0.768351	0.601714	0.747262	0.903856	0.502672	0.441474	0.863306	0.374295	0.951674	0.925473	0.193325	0.567656	0.778366	0.656258	0.722643	0.899953	0.863306	0.551684	0.690713	0.350079	0.863306	0.878373	0.868734	0.849299	0.837507	0.708717	0.960164	0.713971	0.886677	0.960565	0.587003	0.863306	0.86242
MSTRG.136752	0.4834	0.437714	0.769902	-0.18134	0.339762	0.593305	0.395459	0.664246	0.485666	0.305032	0.432229	0.693829	0.126719	0.312941	0.583319	0.352179	0.687554	0.724518	0.529856	0.450633	0.565427	0.935376	-0.354642	0.468016	0.382225	-0.231498	0.471109	0.524245	0.54443	0.450885	0.739629	-0.319299	-0.354642	0.659359	0.659064	0.477662	-0.354642	0.561455	0.449481	0.412827	0.585028	0.76595	-0.122428	0.656651	-0.137228	0.310735	0.863678	-0.354642	-0.355673
MSTRG.138442	0.891906	0.886639	0.978339	0.622089	0.423316	0.510104	0.637746	0.948038	0.347741	0.570617	0.226947	0.97263	0.831512	0.909178	0.887438	0.774432	0.938534	0.930381	0.938406	0.963559	0.590714	0.858825	0.476257	0.420342	0.936369	0.585028	0.27558	0.62422	0.958628	0.646365	0.979896	0.507176	0.476257	0.882647	0.826963	0.402211	0.476257	0.969613	0.960104	0.937795	0.994093	0.984488	0.652815	0.86658	0.642379	0.919198	0.940697	0.476257	0.475988
MSTRG.139530	0.676963	0.702845	0.719396	0.884156	0.531122	0.436532	0.728271	0.811882	0.325773	0.721125	0.215362	0.682305	0.969442	0.967154	0.82734	0.88924	0.781241	0.582148	0.723898	0.904674	0.548977	0.454435	0.842367	0.425836	0.957327	0.909697	0.24879	0.616363	0.761824	0.697349	0.734538	0.885159	0.842367	0.534175	0.721246	0.398267	0.842367	0.885191	0.859235	0.83034	0.829885	0.714198	0.954552	0.747849	0.865571	0.959864	0.594685	0.842367	0.843335
MSTRG.140741	-0.119463	-0.129094	0.463699	-0.0756542	0.981799	0.96425	0.89143	0.592136	0.993325	0.911199	0.98303	0.14847	0.175827	0.357651	0.709435	0.754484	0.635284	0.0662059	-0.0079683	0.293375	0.956191	0.516911	-0.0790569	0.992236	0.393943	0.0295772	0.986717	0.932345	0.0650034	0.920426	0.42072	0.0355562	-0.0790569	-0.088237	0.804606	0.994101	-0.0790569	0.500247	0.141372	0.0430787	0.273304	0.403861	0.173717	0.723459	-0.125867	0.272563	0.448389	-0.0790569	-0.0790121
MSTRG.141222	0.700626	0.661176	0.650215	-0.00900667	-0.161138	0.098521	-0.024426	0.469711	-0.0476527	-0.12537	-0.11618	0.760395	0.181829	0.27018	0.317671	0.0455054	0.464913	0.823804	0.686931	0.449008	0.0985	0.753846	-0.2	-0.0458095	0.317315	-0.125194	-0.07108	0.0835356	0.661576	0.0210745	0.651454	-0.226833	-0.2	0.848134	0.318106	-0.0463157	-0.2	0.428307	0.532295	0.548827	0.587037	0.682454	-0.0962534	0.378661	0.064058	0.315563	0.73992	-0.2	-0.199887
MSTRG.14126	0.177578	0.155736	0.717689	-0.0178394	0.917808	0.974934	0.879246	0.780072	0.95064	0.874299	0.909375	0.454821	0.298915	0.506047	0.847133	0.791064	0.821032	0.385795	0.280837	0.504578	0.984155	0.788696	-0.0916108	0.962513	0.552617	0.0423272	0.931118	0.965255	0.341831	0.932517	0.683686	0.0109955	-0.0916108	0.250546	0.924932	0.955456	-0.0916108	0.68362	0.381927	0.29126	0.520291	0.671494	0.185612	0.881072	-0.0451266	0.434932	0.72528	-0.0916108	-0.0901405
MSTRG.142089	0.637783	0.626182	0.961334	0.403341	0.730771	0.817997	0.864942	0.986569	0.696832	0.80702	0.600378	0.821793	0.68037	0.823758	0.975596	0.898657	0.99338	0.765155	0.720279	0.847808	0.861941	0.909396	0.282136	0.742436	0.867415	0.41585	0.641158	0.869565	0.768277	0.877635	0.938688	0.354051	0.282136	0.658304	0.981807	0.736448	0.282136	0.953226	0.786949	0.727835	0.879939	0.941603	0.539849	0.969418	0.405841	0.801138	0.936991	0.282136	0.281005
MSTRG.142092	0.206886	0.201479	0.710126	0.20082	0.967149	0.967032	0.976043	0.816086	0.935396	0.969211	0.884188	0.447004	0.465903	0.632442	0.897382	0.915163	0.8482	0.360762	0.317509	0.586366	0.99172	0.692072	0.156545	0.96285	0.669091	0.280329	0.901979	0.986275	0.386183	0.994503	0.674015	0.262718	0.156545	0.212882	0.949718	0.959259	0.156545	0.758111	0.457798	0.370069	0.573074	0.661933	0.42107	0.891826	0.16255	0.5664	0.673815	0.156545	0.155798
MSTRG.142097	0.368018	0.364299	0.809314	0.328307	0.916702	0.928017	0.975182	0.8978	0.866051	0.955015	0.795853	0.584671	0.591569	0.744646	0.955916	0.955744	0.922359	0.500452	0.47281	0.711776	0.968073	0.758142	0.263324	0.906672	0.780299	0.390239	0.82069	0.97214	0.53621	0.988712	0.778697	0.360443	0.263324	0.363201	0.984483	0.900137	0.263324	0.857954	0.601132	0.522334	0.70349	0.769425	0.523592	0.94208	0.298636	0.691207	0.76528	0.263324	0.262358
MSTRG.142959	0.814687	0.820394	0.929656	0.729309	0.550449	0.562329	0.749706	0.956921	0.421659	0.711334	0.301716	0.887758	0.915276	0.978064	0.936255	0.890575	0.94201	0.812958	0.869498	0.982946	0.659421	0.755453	0.621156	0.508278	0.992547	0.723949	0.346126	0.70701	0.902254	0.749461	0.935844	0.666122	0.621156	0.755638	0.861712	0.483575	0.621156	0.991203	0.949709	0.916102	0.967488	0.926966	0.79296	0.895091	0.730026	0.972976	0.855636	0.621156	0.622008
MSTRG.142982	0.0628578	0.03487	0.634959	-0.185535	0.880989	0.971825	0.816022	0.687709	0.959533	0.799882	0.935974	0.358655	0.134316	0.354117	0.748377	0.683869	0.73282	0.30968	0.165585	0.363353	0.950621	0.759838	-0.256325	0.947585	0.409981	-0.124848	0.953196	0.913088	0.226299	0.867145	0.590344	-0.154282	-0.256325	0.167483	0.857943	0.952065	-0.256325	0.568691	0.24447	0.153275	0.403039	0.586656	0.0281877	0.795638	-0.206902	0.28485	0.667888	-0.256325	-0.25618
MSTRG.143793	0.597472	0.641435	0.382717	0.989507	0.145347	-0.0139203	0.368686	0.463993	-0.108021	0.372815	-0.202314	0.462521	0.908135	0.795671	0.466572	0.58514	0.419165	0.381156	0.603188	0.712128	0.109663	0.0462498	0.996806	-0.00187561	0.756718	0.99763	-0.182805	0.194269	0.614551	0.307005	0.414665	0.995488	0.996806	0.390266	0.310244	-0.0295131	0.996806	0.60293	0.714685	0.728196	0.609779	0.396136	0.968978	0.355581	0.971974	0.817189	0.232701	0.996806	0.99667
MSTRG.143819	-0.151533	-0.169297	0.45236	-0.203432	0.946763	0.96591	0.836343	0.558126	0.997891	0.849504	0.995474	0.135845	0.0691586	0.269989	0.664927	0.677001	0.606437	0.0683625	-0.0424683	0.228203	0.942227	0.555194	-0.219823	0.983406	0.313922	-0.107273	0.999521	0.906853	0.0269443	0.876337	0.405838	-0.107463	-0.219823	-0.0844501	0.779473	0.988563	-0.219823	0.446205	0.0819636	-0.016469	0.22985	0.393218	0.0412966	0.697194	-0.246516	0.185369	0.462122	-0.219823	-0.219698
MSTRG.144293	0.864152	0.839384	0.962245	0.383363	0.331603	0.486009	0.499884	0.89288	0.324467	0.434426	0.212459	0.969365	0.641441	0.754009	0.801979	0.611266	0.872143	0.946593	0.889571	0.857368	0.542983	0.934749	0.206479	0.377489	0.791528	0.322525	0.270847	0.564823	0.903824	0.539717	0.971899	0.229063	0.206479	0.925745	0.765234	0.356259	0.206479	0.863071	0.86734	0.841576	0.917778	0.97486	0.39605	0.825441	0.425696	0.764928	0.9732	0.206479	0.209774
MSTRG.144326	-0.177261	-0.193931	0.42669	-0.20582	0.949668	0.958615	0.832051	0.538588	0.996603	0.850711	0.996701	0.107292	0.0603699	0.258179	0.650987	0.671229	0.586433	0.036853	-0.0688284	0.21057	0.935753	0.526636	-0.215561	0.982547	0.299858	-0.105997	0.999482	0.901651	0.00119767	0.872092	0.381341	-0.102608	-0.215561	-0.11484	0.764616	0.986709	-0.215561	0.427362	0.0612625	-0.0378879	0.206104	0.366662	0.0405395	0.682194	-0.251401	0.171461	0.433566	-0.215561	-0.21515
MSTRG.144654	-0.256385	-0.268857	0.345693	-0.212557	0.948519	0.932826	0.817646	0.473703	0.986248	0.844817	0.994953	0.0187553	0.0287823	0.214746	0.599867	0.648458	0.522377	-0.0551884	-0.14766	0.149711	0.907843	0.436725	-0.2017	0.970261	0.251684	-0.102	0.992258	0.874078	-0.0762174	0.851342	0.299485	-0.0877711	-0.2017	-0.208488	0.71432	0.975764	-0.2017	0.36784	-0.00544243	-0.104451	0.133251	0.282977	0.0399007	0.624498	-0.264871	0.125063	0.344753	-0.2017	-0.201585
MSTRG.14527	0.700626	0.661176	0.650215	-0.00900667	-0.161138	0.098521	-0.024426	0.469711	-0.0476527	-0.12537	-0.11618	0.760395	0.181829	0.27018	0.317671	0.0455054	0.464913	0.823804	0.686931	0.449008	0.0985	0.753846	-0.2	-0.0458095	0.317315	-0.125194	-0.07108	0.0835356	0.661576	0.0210745	0.651454	-0.226833	-0.2	0.848134	0.318106	-0.0463157	-0.2	0.428307	0.532295	0.548827	0.587037	0.682454	-0.0962534	0.378661	0.064058	0.315563	0.73992	-0.2	-0.199887
MSTRG.147353	0.630851	0.632184	0.896805	0.587486	0.761547	0.745217	0.879792	0.964785	0.646475	0.874095	0.543255	0.76777	0.82015	0.927376	0.992491	0.965904	0.961231	0.668597	0.704109	0.90831	0.834937	0.764016	0.500251	0.725897	0.943653	0.616334	0.583334	0.876052	0.753144	0.901407	0.899347	0.572495	0.500251	0.587256	0.948907	0.696047	0.500251	0.962655	0.82792	0.767042	0.871741	0.876747	0.709487	0.967718	0.569484	0.890234	0.826177	0.500251	0.503461
MSTRG.147621	0.87899	0.850972	0.799191	0.282366	-0.0542931	0.158779	0.143829	0.654482	-0.0164634	0.0463774	-0.115595	0.914156	0.468277	0.535019	0.506745	0.271317	0.632299	0.946471	0.870711	0.685518	0.194136	0.805073	0.091857	0.0170947	0.573011	0.174792	-0.0618555	0.20438	0.854946	0.172663	0.809591	0.0718488	0.091857	0.967303	0.465352	0.00768647	0.091857	0.643776	0.760253	0.772948	0.790515	0.832577	0.206933	0.53712	0.350031	0.582128	0.843478	0.091857	0.0925533
MSTRG.150319	0.338373	0.345481	0.739015	0.443002	0.91574	0.877892	0.98892	0.861005	0.821502	0.978118	0.750628	0.519474	0.658315	0.777275	0.931685	0.986004	0.874615	0.42239	0.44029	0.711046	0.926964	0.632101	0.40691	0.871001	0.802104	0.519044	0.771949	0.942092	0.507532	0.98211	0.712013	0.503205	0.40691	0.287422	0.941325	0.864276	0.40691	0.843603	0.596563	0.520418	0.675313	0.698777	0.643779	0.894659	0.405886	0.72587	0.666378	0.40691	0.405583
MSTRG.150323	0.347226	0.353362	0.758251	0.417567	0.902947	0.894638	0.994836	0.868756	0.828078	0.960836	0.75862	0.537398	0.635363	0.758061	0.927193	0.977242	0.887977	0.455935	0.455379	0.700244	0.928959	0.664414	0.374476	0.86712	0.791618	0.490114	0.777957	0.932681	0.522233	0.976162	0.719432	0.470206	0.374476	0.307123	0.951278	0.871511	0.374476	0.850954	0.594162	0.521438	0.687627	0.717882	0.624157	0.88786	0.385457	0.714493	0.694904	0.374476	0.370484
MSTRG.151216	-0.131393	-0.13518	0.423771	0.00400734	0.991344	0.932562	0.900027	0.577671	0.968048	0.937652	0.955093	0.112423	0.231185	0.393339	0.706438	0.781616	0.608981	0.0137111	-0.0260217	0.307218	0.937592	0.438896	0.0183855	0.978	0.41925	0.118258	0.959384	0.926806	0.0499846	0.924741	0.390273	0.133023	0.0183855	-0.130615	0.782586	0.973164	0.0183855	0.49609	0.14865	0.049075	0.259359	0.36426	0.254119	0.709892	-0.0515625	0.305366	0.387931	0.0183855	0.019973
MSTRG.151531	0.267406	0.254927	0.744132	0.201707	0.95107	0.947232	0.940987	0.850266	0.911077	0.959375	0.849756	0.49888	0.491801	0.6653	0.921785	0.906981	0.858523	0.397065	0.357367	0.632321	0.986649	0.72889	0.142993	0.950319	0.695639	0.270569	0.880816	0.997	0.426064	0.983812	0.730675	0.245292	0.142993	0.282864	0.954625	0.92941	0.142993	0.772374	0.503385	0.409404	0.601391	0.702277	0.405962	0.934409	0.172718	0.594723	0.710843	0.142993	0.1477
MSTRG.156114	-0.0433756	-0.0664684	0.550568	-0.195192	0.923711	0.979297	0.835514	0.630631	0.988988	0.833923	0.97567	0.251194	0.104247	0.31673	0.715132	0.688567	0.677775	0.192286	0.0636502	0.300318	0.956783	0.665262	-0.239402	0.975778	0.36715	-0.116018	0.986484	0.920042	0.129404	0.881509	0.504555	-0.131079	-0.239402	0.0432345	0.828171	0.98061	-0.239402	0.514085	0.166416	0.0706223	0.321186	0.496317	0.0363841	0.755217	-0.227722	0.239035	0.57201	-0.239402	-0.239267
MSTRG.157023	0.134464	0.137853	0.624087	0.254796	0.978275	0.934738	0.984238	0.757774	0.91818	0.988043	0.873026	0.354148	0.480398	0.623723	0.858473	0.924174	0.788978	0.258424	0.246955	0.547769	0.963556	0.572289	0.239679	0.949171	0.651866	0.350232	0.884119	0.963201	0.318595	0.988872	0.587726	0.347583	0.239679	0.107051	0.903108	0.946504	0.239679	0.716426	0.411074	0.324359	0.512389	0.572682	0.483683	0.836057	0.205862	0.555109	0.567362	0.239679	0.238279
MSTRG.157033	0.202965	0.181803	0.739563	-0.00497733	0.905689	0.982031	0.891261	0.797174	0.945329	0.866999	0.902043	0.480088	0.308491	0.512704	0.852147	0.798503	0.837994	0.421483	0.309639	0.514652	0.98181	0.808569	-0.0832508	0.9515	0.565032	0.0525833	0.923387	0.95666	0.371157	0.930794	0.697493	0.0181398	-0.0832508	0.276789	0.93614	0.953143	-0.0832508	0.704044	0.400126	0.312838	0.545615	0.694298	0.203041	0.880061	-0.0273067	0.44995	0.749516	-0.0832508	-0.0838927
MSTRG.157280	0.0904367	0.0834265	0.631694	0.0976653	0.982559	0.981396	0.959008	0.744888	0.969932	0.957092	0.933561	0.345626	0.360951	0.535714	0.838533	0.866351	0.783281	0.262957	0.204466	0.483685	0.991563	0.641827	0.0668141	0.985198	0.57438	0.187141	0.94568	0.976893	0.275406	0.978988	0.58994	0.177373	0.0668141	0.107505	0.910209	0.985917	0.0668141	0.674362	0.346454	0.25459	0.472336	0.578453	0.332521	0.839235	0.0551202	0.463343	0.604221	0.0668141	0.0657311
MSTRG.157460	-0.0125421	-0.0279631	0.567752	-0.0727723	0.968071	0.98851	0.898457	0.670792	0.995466	0.903283	0.974316	0.26633	0.209409	0.405716	0.766451	0.771725	0.713424	0.192364	0.0980354	0.367208	0.98098	0.635342	-0.104821	0.99517	0.449247	0.0161138	0.984901	0.955072	0.167984	0.934241	0.524686	0.00689456	-0.104821	0.0400766	0.861851	0.996847	-0.104821	0.572485	0.226211	0.129496	0.36714	0.512225	0.165884	0.789198	-0.112608	0.326708	0.564993	-0.104821	-0.104762
MSTRG.160324	-0.382065	-0.395973	0.219007	-0.316639	0.905893	0.875696	0.731833	0.350869	0.955659	0.777036	0.98088	-0.111434	-0.0923475	0.0906753	0.489352	0.544342	0.400752	-0.184488	-0.281046	0.0208302	0.843453	0.334323	-0.28842	0.931897	0.122755	-0.201127	0.973163	0.807291	-0.212133	0.774335	0.17665	-0.177088	-0.28842	-0.326948	0.611367	0.935117	-0.28842	0.235536	-0.138489	-0.237749	-0.00441524	0.154903	-0.0690833	0.523432	-0.372729	-0.00529791	0.225553	-0.28842	-0.28696
MSTRG.161281	0.543649	0.561753	0.769904	0.708729	0.752112	0.680691	0.896807	0.878542	0.592608	0.887256	0.496728	0.639217	0.864046	0.923497	0.92462	0.984088	0.872941	0.53603	0.622631	0.856841	0.768794	0.571708	0.666901	0.673089	0.930479	0.760405	0.524665	0.812925	0.676028	0.877954	0.763755	0.738801	0.666901	0.440289	0.871287	0.654322	0.666901	0.912804	0.774181	0.720926	0.798641	0.746426	0.84589	0.862188	0.678157	0.892951	0.665112	0.666901	0.666523
MSTRG.162933	0.403541	0.384591	0.862734	0.161668	0.851779	0.933381	0.892638	0.901655	0.862082	0.85936	0.794364	0.650441	0.474472	0.66231	0.932226	0.856135	0.932148	0.588977	0.501683	0.678587	0.957603	0.887176	0.0588809	0.888336	0.71082	0.198414	0.82521	0.947912	0.556807	0.930858	0.831196	0.14968	0.0588809	0.461317	0.982238	0.882438	0.0588809	0.830937	0.583041	0.50539	0.708587	0.827616	0.337066	0.951057	0.14812	0.612165	0.860353	0.0588809	0.0588475
MSTRG.164249	0.982081	0.988684	0.801569	0.808968	0.0758014	0.110994	0.333724	0.753	-0.0614915	0.284859	-0.18998	0.927144	0.898637	0.881912	0.661928	0.563801	0.711194	0.888705	0.978478	0.934471	0.22336	0.598473	0.680161	0.0347857	0.879824	0.740092	-0.138988	0.289205	0.974189	0.330155	0.835983	0.667521	0.680161	0.916067	0.529596	0.00225252	0.680161	0.828718	0.980156	0.993567	0.931534	0.832247	0.739601	0.620403	0.840795	0.919945	0.737342	0.680161	0.682536
MSTRG.167618	-0.248463	-0.262247	0.360018	-0.233896	0.939337	0.939648	0.813884	0.47756	0.989256	0.831342	0.998841	0.0335422	0.0125304	0.203256	0.598512	0.63833	0.53181	-0.0325255	-0.136534	0.145789	0.909271	0.462319	-0.229145	0.968833	0.244341	-0.12698	0.995124	0.869949	-0.0667072	0.846218	0.308776	-0.115879	-0.229145	-0.191305	0.71994	0.978279	-0.229145	0.371104	-0.00524617	-0.102316	0.141366	0.297344	0.0175214	0.624681	-0.284313	0.116212	0.365809	-0.229145	-0.230107
MSTRG.169783	-0.111994	-0.124126	0.4634	-0.0784395	0.984339	0.951941	0.872825	0.59432	0.987464	0.913757	0.974715	0.152653	0.183086	0.368714	0.716804	0.749301	0.630547	0.0581058	-0.00919019	0.306506	0.956218	0.517389	-0.0839302	0.994851	0.398825	0.0247002	0.982902	0.942131	0.0630775	0.919195	0.433308	0.0300742	-0.0839302	-0.0790483	0.800454	0.98493	-0.0839302	0.495146	0.149123	0.0469137	0.270181	0.405089	0.161499	0.740285	-0.129341	0.276568	0.446846	-0.0839302	-0.0807284
MSTRG.171501	0.564628	0.544037	0.935212	0.270979	0.764987	0.850812	0.837933	0.958266	0.752665	0.808487	0.6649	0.775465	0.583428	0.755308	0.961405	0.855042	0.966545	0.709088	0.64179	0.789417	0.895947	0.929821	0.146165	0.796297	0.79735	0.284986	0.708432	0.904245	0.690366	0.883481	0.92275	0.223219	0.146165	0.615078	0.977052	0.778278	0.146165	0.89507	0.713247	0.642905	0.812203	0.912462	0.408866	0.98207	0.270987	0.715885	0.927283	0.146165	0.149048
MSTRG.173907	0.983216	0.989402	0.834689	0.792712	0.108261	0.164846	0.379891	0.783924	-0.0148799	0.31218	-0.142696	0.945573	0.89218	0.8843	0.688414	0.592452	0.74854	0.916245	0.990031	0.93897	0.264838	0.641133	0.659642	0.0729805	0.890655	0.726418	-0.0936276	0.32045	0.988817	0.365783	0.857021	0.651534	0.659642	0.924607	0.571468	0.0502327	0.659642	0.857256	0.984998	0.997342	0.953432	0.862547	0.739676	0.643663	0.825985	0.925545	0.775726	0.659642	0.659626
MSTRG.177662	0.336328	0.306288	0.814514	-0.00169867	0.816899	0.917678	0.805055	0.838283	0.862696	0.789721	0.805416	0.600166	0.338306	0.548883	0.866561	0.750489	0.865436	0.541545	0.421823	0.586444	0.93353	0.896449	-0.113342	0.880114	0.598567	0.0273419	0.839896	0.920247	0.473747	0.871365	0.792115	-0.0248231	-0.113342	0.433439	0.92915	0.866665	-0.113342	0.735171	0.489022	0.405939	0.620255	0.780613	0.163931	0.915078	-0.00921543	0.490622	0.838023	-0.113342	-0.109929
MSTRG.177663	0.604275	0.584985	0.955787	0.293217	0.726254	0.83525	0.831494	0.967693	0.721277	0.778159	0.630878	0.808762	0.595929	0.760102	0.954194	0.848107	0.977025	0.757005	0.683826	0.80067	0.87095	0.946041	0.162052	0.759065	0.807998	0.300783	0.673447	0.872504	0.730451	0.860771	0.934468	0.234691	0.162052	0.654878	0.974106	0.75105	0.162052	0.912852	0.738172	0.674938	0.842554	0.935592	0.428474	0.966942	0.299563	0.732598	0.950763	0.162052	0.162286
MSTRG.17780	0.651087	0.686978	0.587185	0.95622	0.38081	0.255994	0.598967	0.677294	0.150032	0.591656	0.0453078	0.596857	0.966397	0.914533	0.689349	0.783906	0.644134	0.505	0.685314	0.83862	0.37384	0.282635	0.93731	0.253468	0.892899	0.976832	0.0711123	0.447723	0.712691	0.549055	0.605798	0.962768	0.93731	0.474177	0.561849	0.228361	0.93731	0.785312	0.812987	0.803026	0.753029	0.588794	0.991842	0.590286	0.935808	0.920536	0.447199	0.93731	0.936779
MSTRG.179010	0.971516	0.983621	0.770971	0.845866	0.0461166	0.0850192	0.33356	0.727265	-0.0948624	0.264363	-0.221322	0.902159	0.905733	0.870478	0.629086	0.558045	0.685503	0.874977	0.971839	0.913454	0.186162	0.549763	0.726979	-0.00530768	0.871134	0.780162	-0.175119	0.245825	0.968135	0.304577	0.794703	0.711588	0.726979	0.890185	0.500862	-0.0254962	0.726979	0.817287	0.968203	0.988527	0.920402	0.801965	0.782477	0.571215	0.879148	0.919386	0.700697	0.726979	0.726123
MSTRG.179128	0.986884	0.994871	0.749456	0.795071	-0.0472446	0.0125986	0.237485	0.679733	-0.170016	0.165215	-0.294205	0.907661	0.852058	0.814909	0.566476	0.467073	0.638314	0.892877	0.976943	0.878176	0.110907	0.54945	0.665017	-0.0841904	0.816129	0.713687	-0.246844	0.168486	0.964583	0.216574	0.776804	0.639145	0.665017	0.923428	0.437417	-0.105483	0.665017	0.767239	0.947976	0.975934	0.897134	0.786152	0.705186	0.518792	0.835932	0.869842	0.693527	0.665017	0.66464
MSTRG.179457	0.288733	0.285006	0.756334	0.282791	0.948562	0.945676	0.981779	0.860362	0.899376	0.972848	0.837246	0.512594	0.544287	0.700895	0.931827	0.946216	0.884241	0.422722	0.394444	0.656909	0.981034	0.713348	0.231163	0.936173	0.734899	0.355517	0.859641	0.983788	0.461835	0.997409	0.725845	0.333235	0.231163	0.283145	0.967773	0.929122	0.231163	0.811821	0.535334	0.450861	0.639426	0.712476	0.49196	0.920581	0.248373	0.640283	0.71171	0.231163	0.230891
MSTRG.179622	0.540389	0.575633	0.580355	0.886715	0.532723	0.383097	0.701392	0.693382	0.306257	0.714817	0.211963	0.530736	0.925947	0.903306	0.744228	0.853462	0.677997	0.422028	0.593247	0.809652	0.502055	0.297197	0.881841	0.408352	0.882002	0.930724	0.231962	0.571761	0.62954	0.666746	0.593925	0.926433	0.881841	0.369218	0.635251	0.379467	0.881841	0.787362	0.751041	0.724886	0.709492	0.569013	0.957973	0.651878	0.848475	0.886419	0.438758	0.881841	0.882059
MSTRG.180731	0.962062	0.946749	0.861178	0.498718	0.0205027	0.183169	0.258862	0.745272	-0.00197767	0.165707	-0.116824	0.975339	0.661509	0.704496	0.613657	0.423001	0.721896	0.985814	0.963678	0.823877	0.245536	0.789556	0.321398	0.0541605	0.733005	0.403529	-0.0638278	0.272268	0.952981	0.271333	0.873764	0.306751	0.321398	0.997012	0.543129	0.0404192	0.321398	0.769481	0.889417	0.902547	0.900636	0.89266	0.431125	0.614415	0.554025	0.750816	0.866722	0.321398	0.321216
MSTRG.181412	0.987905	0.979598	0.840994	0.600516	-0.00293247	0.130737	0.254534	0.736988	-0.0571211	0.166113	-0.176974	0.971858	0.732645	0.750948	0.608341	0.442482	0.707438	0.97488	0.985642	0.855221	0.205482	0.727884	0.434662	0.0093112	0.771378	0.507582	-0.124765	0.242389	0.974029	0.25675	0.858532	0.41593	0.434662	0.992742	0.518004	-0.00704303	0.434662	0.781627	0.923717	0.941982	0.915437	0.874847	0.52404	0.593975	0.65248	0.801042	0.82752	0.434662	0.434415
MSTRG.182518	0.608017	0.563823	0.780251	-0.0876962	0.189354	0.444048	0.278078	0.646535	0.31717	0.186862	0.251642	0.769799	0.193069	0.350525	0.540691	0.285625	0.659733	0.80605	0.634513	0.505866	0.434781	0.917906	-0.27529	0.313103	0.411483	-0.163346	0.295891	0.407273	0.635514	0.336196	0.764394	-0.260049	-0.27529	0.773728	0.583482	0.314632	-0.27529	0.56582	0.532006	0.511952	0.63825	0.789385	-0.0817994	0.610994	-0.0337543	0.362867	0.869899	-0.27529	-0.275134
MSTRG.183019	-0.268184	-0.279349	0.332338	-0.207807	0.946819	0.929986	0.820167	0.464487	0.983243	0.844013	0.993165	0.00413647	0.026325	0.208133	0.590339	0.647832	0.51211	-0.0682346	-0.158706	0.139003	0.901633	0.419292	-0.192759	0.965253	0.245499	-0.0948922	0.989316	0.866482	-0.0862603	0.847698	0.283826	-0.0787367	-0.192759	-0.224518	0.70647	0.973611	-0.192759	0.360499	-0.0155053	-0.113861	0.123326	0.269245	0.0485543	0.611265	-0.260096	0.120221	0.329541	-0.192759	-0.19327
MSTRG.183481	0.707832	0.729122	0.800366	0.834269	0.570336	0.519583	0.780951	0.87494	0.396033	0.748303	0.284523	0.746689	0.951744	0.973312	0.87984	0.919852	0.85686	0.661219	0.768332	0.927774	0.617335	0.565322	0.773598	0.485155	0.977156	0.855727	0.31769	0.669883	0.80767	0.747153	0.80088	0.821691	0.773598	0.590946	0.796239	0.467819	0.773598	0.938838	0.884752	0.854037	0.883505	0.792476	0.918744	0.805342	0.820084	0.969009	0.691914	0.773598	0.772014
MSTRG.184923	0.254738	0.232076	0.764394	0.0468766	0.908589	0.967065	0.889064	0.832407	0.926268	0.884915	0.873054	0.517482	0.368132	0.568884	0.884831	0.823391	0.853944	0.442097	0.347863	0.570051	0.982763	0.814841	-0.0353098	0.945683	0.613724	0.101218	0.903402	0.973146	0.41112	0.940264	0.739375	0.0643514	-0.0353098	0.320029	0.947708	0.934284	-0.0353098	0.733338	0.452866	0.361205	0.57975	0.723199	0.246494	0.917645	0.0282074	0.502945	0.766055	-0.0353098	-0.0322211
MSTRG.186059	0.450432	0.427275	0.887741	0.116695	0.771893	0.892834	0.826892	0.890387	0.809722	0.774553	0.742038	0.698816	0.435337	0.62762	0.900756	0.790124	0.930181	0.65779	0.546998	0.670544	0.909884	0.938116	-0.0058717	0.829023	0.682708	0.135193	0.772665	0.891561	0.592991	0.8678	0.851155	0.0760097	-0.0058717	0.532215	0.957465	0.828021	-0.0058717	0.820975	0.593398	0.525183	0.727706	0.857346	0.269349	0.926948	0.11147	0.586974	0.903577	-0.0058717	-0.00739925
MSTRG.186314	0.266294	0.238893	0.778874	-0.0312542	0.851877	0.955041	0.841086	0.814792	0.906034	0.813789	0.857128	0.541445	0.29951	0.510469	0.849902	0.759551	0.8484	0.489231	0.362473	0.535699	0.955154	0.865354	-0.129907	0.912343	0.565237	0.00989964	0.885289	0.931189	0.419275	0.89149	0.743326	-0.0354908	-0.129907	0.360215	0.930288	0.910239	-0.129907	0.711588	0.433162	0.348364	0.577602	0.739639	0.157922	0.890536	-0.0425049	0.452709	0.80215	-0.129907	-0.129103
MSTRG.186975	0.241108	0.222277	0.751483	0.0822085	0.930382	0.962725	0.903261	0.825752	0.931801	0.910838	0.87939	0.500374	0.394693	0.590893	0.894402	0.845024	0.855113	0.41591	0.338325	0.581298	0.990451	0.787255	0.00887794	0.95889	0.629833	0.14221	0.906325	0.986157	0.400671	0.95869	0.728755	0.110595	0.00887794	0.292913	0.949244	0.942548	0.00887794	0.738085	0.456466	0.364763	0.576657	0.707973	0.279042	0.922185	0.0539522	0.518767	0.742727	0.00887794	0.0122665
MSTRG.189624	0.881556	0.889643	0.913767	0.78298	0.424886	0.449621	0.660493	0.921618	0.291553	0.606522	0.166698	0.917904	0.93723	0.973702	0.876423	0.825174	0.899607	0.857541	0.924596	0.989179	0.546915	0.721493	0.668795	0.379048	0.986605	0.760989	0.212112	0.596671	0.948557	0.647445	0.921788	0.698359	0.668795	0.814576	0.787912	0.358086	0.668795	0.973465	0.981184	0.962474	0.984133	0.920153	0.815961	0.827204	0.793615	0.985664	0.839294	0.668795	0.668416
MSTRG.190180	0.993897	0.997881	0.758231	0.750602	-0.0694626	0.0120496	0.214531	0.677989	-0.175342	0.135654	-0.298856	0.920404	0.817992	0.787822	0.553837	0.437732	0.634331	0.913288	0.98089	0.863228	0.102472	0.577027	0.611524	-0.0953445	0.79338	0.662933	-0.249364	0.155496	0.967415	0.195819	0.784517	0.583553	0.611524	0.946121	0.431772	-0.114422	0.611524	0.755777	0.93873	0.967067	0.89412	0.79666	0.658317	0.513597	0.79794	0.845835	0.713507	0.611524	0.611177
MSTRG.191420	-0.269593	-0.281704	0.33195	-0.21923	0.94285	0.9313	0.816248	0.463364	0.983236	0.838189	0.993458	0.00385373	0.0168847	0.199976	0.586158	0.64137	0.50908	-0.0667355	-0.161171	0.132875	0.899946	0.423001	-0.205553	0.963269	0.238567	-0.107139	0.9903	0.86354	-0.0883582	0.843137	0.283049	-0.0918096	-0.205553	-0.222667	0.704499	0.972638	-0.205553	0.356127	-0.0204222	-0.119071	0.119953	0.269218	0.0382954	0.608576	-0.269518	0.113066	0.331655	-0.205553	-0.206062
MSTRG.192253	0.993613	0.989411	0.810662	0.651521	-0.0382994	0.0879476	0.23954	0.716498	-0.106383	0.144979	-0.227952	0.954728	0.757471	0.755671	0.580463	0.435659	0.676345	0.959622	0.986202	0.850614	0.160107	0.673289	0.494448	-0.0398754	0.773943	0.559712	-0.175782	0.199541	0.975459	0.225408	0.828199	0.471384	0.494448	0.980479	0.482891	-0.0521216	0.494448	0.770397	0.926409	0.949124	0.907734	0.847185	0.574297	0.554686	0.70677	0.813879	0.788111	0.494448	0.493387
MSTRG.192428	0.94084	0.959504	0.685557	0.898409	-0.0137932	-0.00992544	0.273674	0.651167	-0.179972	0.216932	-0.303177	0.836902	0.915911	0.852401	0.560737	0.515341	0.605656	0.80471	0.932988	0.879922	0.100893	0.434732	0.798584	-0.0836811	0.842233	0.835126	-0.260836	0.16946	0.925265	0.238961	0.71608	0.775992	0.798584	0.83319	0.415156	-0.107559	0.798584	0.759944	0.938205	0.96567	0.86749	0.719025	0.818456	0.492052	0.926575	0.903207	0.600545	0.798584	0.798131
MSTRG.194198	0.942446	0.931431	0.955055	0.593271	0.28871	0.40222	0.512084	0.903912	0.225395	0.441488	0.101004	0.994757	0.794885	0.860773	0.810783	0.666814	0.87298	0.964304	0.964644	0.9386	0.477812	0.846542	0.432844	0.295208	0.8874	0.534684	0.157881	0.514829	0.977665	0.523838	0.968087	0.447749	0.432844	0.947771	0.740366	0.274671	0.432844	0.915982	0.958994	0.94488	0.97871	0.972487	0.592871	0.801161	0.632113	0.884101	0.93108	0.432844	0.434479
MSTRG.194581	0.0709638	0.0542259	0.622338	-0.00314132	0.971808	0.972955	0.898556	0.725118	0.975127	0.925338	0.94134	0.338014	0.292533	0.488611	0.821394	0.807801	0.757285	0.246124	0.171089	0.454516	0.99037	0.670604	-0.0454381	0.993402	0.523471	0.0783483	0.960316	0.981966	0.239224	0.953526	0.597316	0.0639123	-0.0454381	0.116701	0.890829	0.97844	-0.0454381	0.627769	0.311038	0.211884	0.433072	0.571076	0.216972	0.849998	-0.0425588	0.404436	0.610856	-0.0454381	-0.0415996
MSTRG.195123	0.553966	0.600522	0.310527	0.981007	0.0924565	-0.0764523	0.31329	0.393542	-0.163547	0.319006	-0.251571	0.401322	0.872778	0.744952	0.396762	0.528939	0.347349	0.324113	0.554575	0.655601	0.0438277	-0.0307692	1	-0.0602757	0.702494	0.989787	-0.235686	0.128217	0.563097	0.245284	0.342827	0.99337	1	0.3388	0.23848	-0.0858513	1	0.539195	0.663328	0.682113	0.55009	0.325356	0.952402	0.281561	0.962864	0.769835	0.158464	1	0.999433
MSTRG.19586	0.25013	0.245787	0.727279	0.259188	0.963523	0.945484	0.974166	0.838052	0.911357	0.980336	0.852914	0.476304	0.522577	0.682302	0.920464	0.936589	0.861852	0.378698	0.353783	0.633639	0.985101	0.688912	0.213802	0.950364	0.71238	0.336269	0.87491	0.991182	0.421836	0.999232	0.701863	0.317879	0.213802	0.244588	0.954935	0.937775	0.213802	0.78457	0.504165	0.416045	0.604517	0.6818	0.469086	0.91414	0.220563	0.614523	0.681593	0.213802	0.215057
MSTRG.195904	0.335816	0.295956	0.782849	-0.165537	0.651497	0.828139	0.644999	0.748273	0.762546	0.597076	0.715924	0.603375	0.177484	0.396095	0.739365	0.568306	0.786	0.586971	0.413202	0.479288	0.815301	0.931868	-0.302857	0.755857	0.459218	-0.164956	0.748424	0.780322	0.450658	0.713113	0.749833	-0.230855	-0.302857	0.484814	0.826869	0.755559	-0.302857	0.633506	0.414548	0.346545	0.564834	0.756594	-0.0324222	0.80682	-0.154929	0.354977	0.847751	-0.302857	-0.301941
MSTRG.197661	-0.152937	-0.172202	0.45086	-0.219989	0.941514	0.957522	0.818941	0.550967	0.99443	0.840242	0.992768	0.136499	0.0582916	0.263366	0.66143	0.662866	0.60228	0.0664702	-0.0456568	0.225875	0.939082	0.561026	-0.238983	0.982569	0.305264	-0.126352	0.997157	0.905867	0.0214183	0.869212	0.408303	-0.12737	-0.238983	-0.0804758	0.773463	0.982914	-0.238983	0.43723	0.0779899	-0.0208161	0.223976	0.391991	0.0169451	0.699471	-0.264705	0.175041	0.463205	-0.238983	-0.237824
MSTRG.197671	-0.101482	-0.113861	0.481039	-0.0864532	0.981252	0.965392	0.882266	0.605028	0.9944	0.909297	0.981791	0.169071	0.177153	0.365196	0.721061	0.751253	0.645633	0.083178	0.00602377	0.307607	0.962216	0.540943	-0.0964876	0.99651	0.400382	0.0147644	0.988688	0.941714	0.0780458	0.921686	0.443732	0.0175606	-0.0964876	-0.0631372	0.812547	0.992954	-0.0964876	0.507017	0.154743	0.0545756	0.284622	0.422456	0.156956	0.742418	-0.135074	0.277426	0.469018	-0.0964876	-0.0949439
MSTRG.199251	-0.171527	-0.185222	0.427341	-0.165464	0.962022	0.959473	0.851868	0.547142	0.996726	0.871196	0.994916	0.107129	0.0924082	0.283598	0.663229	0.696387	0.594063	0.0327876	-0.0613777	0.227781	0.940385	0.511154	-0.169969	0.986092	0.323232	-0.0619301	0.996945	0.909065	0.0100144	0.886662	0.381884	-0.0560276	-0.169969	-0.121245	0.771902	0.990301	-0.169969	0.443013	0.0766133	-0.022295	0.217266	0.366744	0.0838509	0.687546	-0.213633	0.19708	0.425992	-0.169969	-0.169873
MSTRG.201458	0.73655	0.768294	0.62284	0.970746	0.306603	0.194075	0.530716	0.689777	0.0765748	0.527942	-0.0365964	0.667096	0.988562	0.934753	0.684702	0.743268	0.649304	0.576771	0.756856	0.880153	0.323315	0.321106	0.932853	0.187828	0.910195	0.972339	-0.00378809	0.405219	0.776462	0.495253	0.653638	0.94803	0.932853	0.570062	0.540988	0.153721	0.932853	0.797295	0.868085	0.863613	0.79594	0.632389	0.974571	0.595662	0.959026	0.945401	0.4894	0.932853	0.934503
MSTRG.202247	-0.167183	-0.180891	0.427644	-0.154414	0.966585	0.957587	0.853647	0.551839	0.995414	0.878512	0.992039	0.108381	0.104058	0.294125	0.669059	0.703136	0.594527	0.0294858	-0.0597085	0.236296	0.94197	0.506581	-0.157982	0.987675	0.331737	-0.0502305	0.995682	0.914194	0.0125125	0.890711	0.385903	-0.0438866	-0.157982	-0.120052	0.773293	0.988977	-0.157982	0.446423	0.0833587	-0.0169578	0.219671	0.367505	0.0945133	0.693992	-0.202544	0.206246	0.42361	-0.157982	-0.157043
MSTRG.202638	-0.099257	-0.116422	0.496579	-0.154755	0.958208	0.975154	0.859549	0.601804	0.999123	0.872842	0.989428	0.185343	0.123365	0.323561	0.706043	0.714002	0.647753	0.113388	0.0097428	0.282992	0.959584	0.5864	-0.17717	0.99131	0.366454	-0.0612472	0.996363	0.929082	0.0793163	0.900736	0.452981	-0.0647763	-0.17717	-0.0374122	0.811979	0.993406	-0.17717	0.494165	0.137359	0.0388306	0.281476	0.438742	0.0867896	0.736024	-0.197228	0.239608	0.501292	-0.17717	-0.176646
MSTRG.203517	-0.212148	-0.225019	0.386455	-0.180803	0.95945	0.945761	0.837494	0.513316	0.991672	0.863994	0.99426	0.0629713	0.0686735	0.256375	0.635698	0.67802	0.559052	-0.0140124	-0.103868	0.194184	0.925959	0.470313	-0.176635	0.980188	0.29339	-0.0730058	0.994651	0.895499	-0.0319112	0.872801	0.342587	-0.0624368	-0.176635	-0.165561	0.744618	0.983415	-0.176635	0.408139	0.0397003	-0.0600681	0.176844	0.324907	0.0701695	0.660079	-0.231409	0.167351	0.383277	-0.176635	-0.176094
MSTRG.206936	0.997325	0.998873	0.796012	0.725863	-0.0256537	0.0641163	0.250872	0.71249	-0.122409	0.171493	-0.246252	0.943602	0.814495	0.799833	0.592432	0.465735	0.675545	0.935367	0.990839	0.879795	0.154069	0.628668	0.58016	-0.0433825	0.808872	0.639492	-0.196438	0.203934	0.978976	0.239068	0.819556	0.557373	0.58016	0.960495	0.477825	-0.0629308	0.58016	0.783465	0.949133	0.973087	0.915276	0.831698	0.641484	0.557553	0.77135	0.853042	0.7563	0.58016	0.579831
MSTRG.209502	0.714791	0.675615	0.642343	0.0103797	-0.183784	0.0725755	-0.0425062	0.464467	-0.076965	-0.141184	-0.147906	0.76282	0.194535	0.275597	0.307185	0.0363349	0.451243	0.824625	0.694702	0.453903	0.0744456	0.737279	-0.18007	-0.0728852	0.320524	-0.108104	-0.100435	0.0634711	0.669124	0.00136558	0.648028	-0.209991	-0.18007	0.857275	0.300719	-0.0751076	-0.18007	0.423506	0.540832	0.558545	0.587709	0.677126	-0.0818933	0.367253	0.0866446	0.323672	0.729393	-0.18007	-0.179257
MSTRG.210857	0.814345	0.818666	0.936355	0.716147	0.55688	0.574757	0.755106	0.964294	0.432483	0.715222	0.312352	0.891514	0.908037	0.97454	0.940968	0.892316	0.946895	0.817434	0.868667	0.981402	0.668656	0.767328	0.60586	0.517141	0.990745	0.710719	0.358026	0.714956	0.902735	0.754927	0.942175	0.651719	0.60586	0.759589	0.869497	0.493225	0.60586	0.993257	0.947895	0.912655	0.968528	0.933599	0.78368	0.902074	0.718952	0.969624	0.865072	0.60586	0.606848
MSTRG.212313	-0.131304	-0.137648	0.442718	-0.0423062	0.98668	0.952647	0.898581	0.581727	0.984708	0.922537	0.974477	0.127295	0.195778	0.368329	0.704637	0.766212	0.622563	0.0402052	-0.0200337	0.293437	0.948111	0.479586	-0.0365914	0.986722	0.401088	0.0678564	0.976871	0.927791	0.0541944	0.92262	0.400964	0.0783779	-0.0365914	-0.113956	0.794188	0.987976	-0.0365914	0.496527	0.138981	0.0409923	0.264052	0.382341	0.20922	0.711999	-0.0956848	0.282788	0.418516	-0.0365914	-0.0365707
MSTRG.212376	-0.232695	-0.248362	0.369917	-0.225464	0.947403	0.938246	0.810938	0.492259	0.989189	0.842355	0.995035	0.0463677	0.0299397	0.223127	0.614471	0.646508	0.537784	-0.0295322	-0.127741	0.166472	0.91626	0.469248	-0.223119	0.975249	0.260256	-0.119752	0.995999	0.884715	-0.0569898	0.853738	0.328361	-0.109794	-0.223119	-0.175813	0.726748	0.97652	-0.223119	0.379142	0.0116834	-0.0891394	0.150113	0.308681	0.0221094	0.646607	-0.274793	0.131946	0.373648	-0.223119	-0.221714
MSTRG.212979	-0.165011	-0.189101	0.441982	-0.287106	0.911666	0.951494	0.782909	0.531908	0.986175	0.798174	0.98775	0.130643	0.000570426	0.213161	0.630899	0.615489	0.579784	0.0698945	-0.0623439	0.188357	0.921537	0.577205	-0.313547	0.965702	0.259821	-0.199407	0.993995	0.88225	0.00371466	0.835556	0.398237	-0.204432	-0.313547	-0.0736241	0.753005	0.969036	-0.313547	0.404768	0.0464295	-0.0522985	0.199519	0.384812	-0.0516781	0.678492	-0.324392	0.127899	0.468347	-0.313547	-0.31225
MSTRG.213175	0.954049	0.938266	0.786066	0.469893	-0.112141	0.0588417	0.129033	0.65042	-0.126307	0.0333106	-0.236134	0.937894	0.603319	0.627168	0.503615	0.302504	0.623197	0.962101	0.940981	0.758087	0.117512	0.720665	0.29277	-0.074117	0.652449	0.36079	-0.18437	0.144086	0.920395	0.140253	0.803036	0.263349	0.29277	0.993012	0.426806	-0.0870907	0.29277	0.681085	0.843138	0.868438	0.841306	0.824764	0.370791	0.506923	0.532344	0.683599	0.799411	0.29277	0.292604
MSTRG.213388	0.0156017	0.0264371	0.483913	0.271599	0.970599	0.871089	0.949867	0.65042	0.881665	0.979834	0.847671	0.20884	0.452663	0.570908	0.775995	0.889728	0.675348	0.0986659	0.12195	0.462692	0.905433	0.405374	0.29277	0.916463	0.585862	0.38443	0.852484	0.913809	0.195907	0.949207	0.454633	0.400749	0.29277	-0.0437323	0.810298	0.90935	0.29277	0.61861	0.314683	0.227248	0.394212	0.429807	0.504276	0.743365	0.211259	0.495335	0.408177	0.29277	0.292604
MSTRG.27294	0.984536	0.990903	0.814432	0.767977	0.0395964	0.126592	0.336205	0.748643	-0.0643689	0.24206	-0.188667	0.93968	0.851158	0.834476	0.634001	0.537709	0.715042	0.931899	0.991517	0.898213	0.208659	0.629994	0.63153	0.0108029	0.848069	0.694364	-0.142549	0.25276	0.986872	0.304252	0.825669	0.616683	0.63153	0.933049	0.528497	0.00133371	0.63153	0.826438	0.961319	0.982616	0.937696	0.845124	0.710678	0.584233	0.809418	0.889421	0.765093	0.63153	0.628461
MSTRG.27494	0.605683	0.567994	0.89692	0.0328419	0.469873	0.677149	0.556111	0.824343	0.555111	0.479315	0.478675	0.809742	0.350631	0.530441	0.758757	0.554318	0.838393	0.80784	0.660118	0.642992	0.682227	0.991526	-0.138987	0.565312	0.591218	-0.00558084	0.524209	0.662571	0.684154	0.608518	0.875871	-0.0929587	-0.138987	0.737939	0.802988	0.563257	-0.138987	0.740645	0.624591	0.579457	0.743739	0.890733	0.107331	0.812636	0.0673847	0.521173	0.954291	-0.138987	-0.138524
MSTRG.29640	0.111515	0.0985215	0.661746	0.0408854	0.967036	0.989349	0.934431	0.756538	0.97486	0.930974	0.938118	0.379508	0.326838	0.516667	0.841771	0.838434	0.797395	0.302481	0.223074	0.483362	0.997019	0.699285	-0.00548873	0.987126	0.559277	0.120815	0.953248	0.97904	0.290965	0.967173	0.621459	0.103412	-0.00548873	0.152017	0.919246	0.985795	-0.00548873	0.674079	0.349925	0.257455	0.48353	0.610163	0.267422	0.855915	0.0034869	0.44372	0.648968	-0.00548873	-0.00575394
MSTRG.30535	0.891045	0.898041	0.919278	0.774618	0.412188	0.443583	0.649227	0.921771	0.283241	0.593093	0.15796	0.927523	0.931256	0.968952	0.872586	0.814523	0.8997	0.869808	0.932821	0.989237	0.539862	0.731599	0.656631	0.369848	0.982817	0.74938	0.204061	0.588782	0.955566	0.637407	0.927415	0.684717	0.656631	0.828557	0.784663	0.349091	0.656631	0.97233	0.984128	0.966443	0.98797	0.926683	0.803957	0.825451	0.787266	0.982319	0.848035	0.656631	0.656259
MSTRG.30766	0.684084	0.670717	0.978968	0.411641	0.685235	0.777606	0.821777	0.987663	0.651918	0.76673	0.551626	0.859778	0.691092	0.833139	0.969616	0.871552	0.99502	0.804748	0.760429	0.869621	0.8298	0.929231	0.28	0.702573	0.874614	0.412941	0.594827	0.841572	0.802477	0.844034	0.962417	0.345724	0.28	0.710417	0.966427	0.691222	0.28	0.957594	0.816465	0.761772	0.902805	0.963371	0.526861	0.968619	0.417	0.812472	0.958234	0.28	0.279841
MSTRG.31217	-0.0753686	-0.0831275	0.502824	-0.0357225	0.980497	0.974897	0.916366	0.625816	0.991424	0.91988	0.976566	0.19184	0.213479	0.392029	0.735104	0.782264	0.672122	0.116189	0.041538	0.329814	0.964535	0.546408	-0.0445548	0.989543	0.432212	0.0668538	0.979679	0.93745	0.114246	0.934421	0.453161	0.069451	-0.0445548	-0.0478268	0.831211	0.99738	-0.0445548	0.542775	0.184054	0.0893888	0.320666	0.44364	0.215019	0.741252	-0.083949	0.313492	0.485671	-0.0445548	-0.0464656
MSTRG.31299	-0.259291	-0.271576	0.342486	-0.212332	0.948411	0.931571	0.817041	0.471191	0.985601	0.84464	0.994604	0.0153414	0.0279447	0.213351	0.597924	0.647688	0.519843	-0.0588211	-0.150601	0.147574	0.906611	0.432975	-0.20063	0.969619	0.250047	-0.101352	0.99171	0.872942	-0.0791069	0.850505	0.296313	-0.086681	-0.20063	-0.212096	0.712276	0.975119	-0.20063	0.365605	-0.00781604	-0.106812	0.130512	0.279681	0.040296	0.622261	-0.264926	0.123544	0.341146	-0.20063	-0.200516
MSTRG.3519	0.744762	0.738187	0.979753	0.525176	0.637845	0.704304	0.797386	0.985238	0.573596	0.746708	0.466029	0.889005	0.775684	0.893419	0.968776	0.881183	0.994027	0.828816	0.817648	0.92328	0.776244	0.889789	0.397359	0.638581	0.925797	0.521365	0.507985	0.799581	0.853552	0.81603	0.969482	0.45559	0.397359	0.744542	0.940494	0.621762	0.397359	0.982942	0.877626	0.832256	0.942748	0.968244	0.616068	0.95427	0.526183	0.877122	0.941834	0.397359	0.397093
MSTRG.35350	0.496274	0.486474	0.894727	0.345911	0.847294	0.895141	0.930789	0.953612	0.807292	0.899078	0.724002	0.705132	0.628796	0.785595	0.981065	0.935739	0.968491	0.629911	0.589526	0.782641	0.939083	0.851145	0.250767	0.851536	0.824983	0.384392	0.758497	0.946237	0.64664	0.952038	0.871013	0.337979	0.250767	0.509931	0.999577	0.841646	0.250767	0.909239	0.691413	0.618281	0.790813	0.86385	0.515073	0.97703	0.331578	0.742756	0.862768	0.250767	0.25085
MSTRG.36414	0.988413	0.989869	0.71878	0.732175	-0.11877	-0.0554444	0.137612	0.632884	-0.231575	0.0845886	-0.354292	0.89988	0.797356	0.763834	0.512789	0.37928	0.583255	0.883432	0.960747	0.844923	0.0493297	0.541709	0.59285	-0.142835	0.759959	0.637494	-0.301579	0.113577	0.94166	0.140267	0.76154	0.558495	0.59285	0.943521	0.374891	-0.17594	0.59285	0.706931	0.920526	0.94957	0.857857	0.761141	0.614906	0.484399	0.779133	0.816099	0.675163	0.59285	0.596119
MSTRG.40289	0.804992	0.780472	0.97915	0.36325	0.461427	0.592191	0.598079	0.931434	0.448872	0.549966	0.340513	0.941884	0.645684	0.779264	0.869845	0.692153	0.920809	0.901764	0.8443	0.866868	0.654702	0.957425	0.195783	0.50508	0.815924	0.320675	0.396407	0.67699	0.866686	0.649115	0.987156	0.233815	0.195783	0.865258	0.841711	0.479035	0.195783	0.892717	0.850472	0.811254	0.911759	0.982295	0.404291	0.896178	0.392056	0.772589	0.984089	0.195783	0.200029
MSTRG.45768	0.834052	0.831231	0.979476	0.623737	0.530435	0.600302	0.733815	0.976986	0.447576	0.670745	0.32995	0.935112	0.841365	0.92812	0.935303	0.850731	0.969636	0.882217	0.892795	0.962057	0.676859	0.854228	0.491794	0.518295	0.956836	0.6059	0.375905	0.70787	0.923134	0.736277	0.974741	0.535843	0.491794	0.815084	0.88541	0.503122	0.491794	0.993022	0.939521	0.906805	0.983477	0.977674	0.688759	0.908645	0.635572	0.929167	0.933092	0.491794	0.490979
MSTRG.47308	-0.260996	-0.273171	0.3406	-0.212197	0.948339	0.930826	0.816679	0.469711	0.985211	0.844528	0.99439	0.0133363	0.0274526	0.21253	0.596777	0.647231	0.518351	-0.060954	-0.152326	0.146318	0.905879	0.430769	-0.2	0.969233	0.249083	-0.10097	0.991379	0.872267	-0.0808032	0.850006	0.294447	-0.08604	-0.2	-0.214212	0.711068	0.974732	-0.2	0.36429	-0.00920998	-0.108197	0.128902	0.277743	0.0405278	0.620942	-0.264956	0.12265	0.339025	-0.2	-0.199887
MSTRG.4941	0.215942	0.226823	0.624618	0.417829	0.940754	0.841852	0.957449	0.767479	0.824819	0.989518	0.766588	0.390367	0.614197	0.72764	0.877426	0.954839	0.788713	0.271421	0.315523	0.63806	0.908456	0.512355	0.410024	0.883826	0.73717	0.509237	0.781334	0.934558	0.381814	0.970563	0.609656	0.509934	0.410024	0.148634	0.876791	0.862598	0.410024	0.754077	0.502272	0.421274	0.563576	0.579167	0.61415	0.843588	0.362116	0.657042	0.539293	0.410024	0.411771
MSTRG.50322	0.010872	0.00444923	0.557857	0.067519	0.996761	0.96457	0.93812	0.688727	0.974352	0.961307	0.945393	0.261812	0.32248	0.494844	0.800331	0.842053	0.722885	0.16621	0.119375	0.429339	0.979783	0.56824	0.0533848	0.992411	0.525671	0.16661	0.956178	0.971308	0.192261	0.967934	0.524634	0.166243	0.0533848	0.0209805	0.868173	0.985415	0.0533848	0.612071	0.279975	0.182953	0.395639	0.502273	0.305266	0.805392	0.0183045	0.412393	0.525177	0.0533848	0.0546594
MSTRG.5116	-0.0783198	-0.104246	0.514663	-0.236863	0.916835	0.959783	0.798839	0.59731	0.982243	0.817472	0.97248	0.215372	0.0676471	0.284283	0.68906	0.653724	0.640069	0.148309	0.0205674	0.268886	0.942735	0.640572	-0.278212	0.971864	0.329568	-0.157584	0.985175	0.91142	0.0854098	0.860645	0.478601	-0.170513	-0.278212	0.0141214	0.797941	0.967826	-0.278212	0.47061	0.129317	0.0299307	0.276707	0.460795	-0.011997	0.740006	-0.270712	0.19922	0.538941	-0.278212	-0.275388
MSTRG.52114	0.0365478	0.0168548	0.608687	-0.0803784	0.954329	0.986356	0.882575	0.70006	0.986716	0.891006	0.960092	0.317666	0.219802	0.424141	0.787117	0.766582	0.73839	0.242544	0.141147	0.399647	0.98412	0.685511	-0.126679	0.990121	0.467959	-0.000904935	0.976113	0.961743	0.208863	0.930338	0.572274	-0.0174728	-0.126679	0.101296	0.877343	0.986007	-0.126679	0.594294	0.262191	0.164745	0.40151	0.556328	0.147159	0.819495	-0.114996	0.344957	0.61242	-0.126679	-0.124985
MSTRG.52201	0.994176	0.992158	0.853221	0.695644	0.0662772	0.158888	0.324632	0.774214	-0.0232566	0.251812	-0.148357	0.971918	0.819848	0.830196	0.665424	0.527782	0.743561	0.955062	0.99692	0.911633	0.250984	0.702404	0.543225	0.0568568	0.842686	0.615458	-0.0967895	0.299245	0.990224	0.325592	0.875586	0.531036	0.543225	0.96996	0.559837	0.0337645	0.543225	0.831528	0.965818	0.979403	0.945874	0.883662	0.629191	0.639139	0.736745	0.872537	0.817316	0.543225	0.543818
MSTRG.52996	0.765038	0.731153	0.902956	0.164653	0.261045	0.487338	0.417089	0.799884	0.328242	0.316846	0.236425	0.900954	0.433612	0.567046	0.688053	0.469883	0.79398	0.917929	0.795455	0.698693	0.499675	0.954823	-0.0224949	0.346133	0.623396	0.0952093	0.288062	0.48984	0.805451	0.449602	0.890541	-0.00334307	-0.0224949	0.879133	0.699012	0.34638	-0.0224949	0.746041	0.724058	0.703183	0.811639	0.914321	0.184043	0.727943	0.218709	0.587573	0.955181	-0.0224949	-0.0230687
MSTRG.53722	-0.0802234	-0.0941104	0.513236	-0.116667	0.961248	0.983117	0.885457	0.618415	0.99911	0.884143	0.987553	0.202201	0.152181	0.346112	0.719265	0.738936	0.668455	0.135982	0.0353238	0.301801	0.964034	0.590777	-0.138083	0.989543	0.391901	-0.0218991	0.991987	0.929812	0.105427	0.913025	0.461814	-0.0254097	-0.138083	-0.0265553	0.827367	0.99861	-0.138083	0.521352	0.160137	0.0650377	0.30821	0.454849	0.129729	0.738873	-0.159504	0.267727	0.51362	-0.138083	-0.139773
MSTRG.53726	-0.105793	-0.11823	0.483927	-0.103869	0.974119	0.97197	0.882941	0.60116	0.997995	0.89817	0.987557	0.170136	0.159009	0.348796	0.713183	0.742572	0.647542	0.0929278	0.00626027	0.294755	0.961144	0.551702	-0.116014	0.994268	0.388299	-0.00375665	0.992106	0.933947	0.0775048	0.916376	0.43951	-0.00213338	-0.116014	-0.0620093	0.81316	0.996818	-0.116014	0.50457	0.145691	0.0478209	0.283851	0.424709	0.142085	0.732884	-0.151403	0.264467	0.476731	-0.116014	-0.116082
MSTRG.55511	0.64913	0.622725	0.951762	0.179926	0.546304	0.730488	0.675323	0.896597	0.599005	0.58286	0.514899	0.850517	0.478837	0.644716	0.844008	0.682057	0.923103	0.843324	0.723975	0.73262	0.744344	0.995516	0.0191567	0.617402	0.705357	0.15473	0.554112	0.725624	0.752677	0.703152	0.917951	0.0726992	0.0191567	0.744546	0.881959	0.62304	0.0191567	0.844455	0.708024	0.665122	0.828921	0.940503	0.272755	0.86895	0.202695	0.637872	0.983398	0.0191567	0.0158013
MSTRG.55512	0.518613	0.496837	0.911512	0.232228	0.791153	0.865816	0.838928	0.93921	0.781163	0.822669	0.698454	0.73893	0.551454	0.731241	0.955064	0.848296	0.951565	0.666362	0.596919	0.762008	0.913229	0.917341	0.112535	0.82513	0.771055	0.251389	0.740563	0.922196	0.646332	0.894891	0.901561	0.1932	0.112535	0.573385	0.973838	0.802786	0.112535	0.869605	0.676373	0.601621	0.776609	0.885877	0.373819	0.981889	0.22698	0.683459	0.905052	0.112535	0.116572
MSTRG.58562	0.332996	0.341268	0.710364	0.476939	0.91548	0.840184	0.965477	0.843559	0.796322	0.98485	0.723427	0.498459	0.686395	0.798362	0.928106	0.984844	0.84981	0.382381	0.424956	0.723508	0.909424	0.586482	0.448754	0.859914	0.811219	0.554972	0.747441	0.939982	0.491068	0.974955	0.699787	0.543734	0.448754	0.26848	0.916977	0.838154	0.448754	0.828213	0.600767	0.521898	0.658286	0.671421	0.664678	0.89457	0.434125	0.737943	0.626406	0.448754	0.450977
MSTRG.58906	0.926172	0.910587	0.958908	0.51568	0.276763	0.407334	0.481389	0.886714	0.237259	0.411136	0.118307	0.995953	0.734366	0.816283	0.79528	0.624898	0.869698	0.97273	0.95137	0.909703	0.48048	0.883717	0.345493	0.302426	0.846143	0.450808	0.173156	0.511077	0.959425	0.50775	0.969713	0.359906	0.345493	0.955271	0.735252	0.280781	0.345493	0.891888	0.930551	0.917084	0.961296	0.975424	0.506247	0.798209	0.553464	0.835687	0.950088	0.345493	0.347181
MSTRG.59002	0.540349	0.547717	0.816758	0.612086	0.80807	0.749421	0.909768	0.920874	0.668741	0.920781	0.572069	0.667819	0.820234	0.91422	0.97022	0.988973	0.910719	0.554043	0.614455	0.864531	0.840434	0.659748	0.553597	0.750185	0.923151	0.66078	0.608178	0.886759	0.6707	0.922516	0.821225	0.631932	0.553597	0.469742	0.923559	0.71937	0.553597	0.921964	0.769046	0.702607	0.802673	0.791883	0.754167	0.934841	0.584568	0.869998	0.728554	0.553597	0.557346
MSTRG.60428	-0.217701	-0.225937	0.35999	-0.111947	0.973901	0.924767	0.849874	0.508349	0.9761	0.892866	0.975702	0.0387275	0.120191	0.293054	0.641232	0.707101	0.544261	-0.0535321	-0.11435	0.212876	0.91749	0.411919	-0.0938786	0.97497	0.32114	0.003427	0.977091	0.898769	-0.0396513	0.883451	0.324864	0.0209314	-0.0938786	-0.19622	0.733425	0.971483	-0.0938786	0.411168	0.0517445	-0.0498613	0.171079	0.298566	0.139783	0.657548	-0.167414	0.200603	0.339346	-0.0938786	-0.0918067
MSTRG.60738	-0.194954	-0.209904	0.405343	-0.191777	0.957053	0.949621	0.832188	0.525447	0.99388	0.859918	0.994937	0.0842561	0.067416	0.260744	0.645447	0.675083	0.571947	0.00745909	-0.0877743	0.205448	0.931747	0.496553	-0.194259	0.983376	0.298409	-0.0879064	0.997002	0.901711	-0.0170851	0.873814	0.363346	-0.0805949	-0.194259	-0.141022	0.753957	0.984345	-0.194259	0.416853	0.0517813	-0.04842	0.190275	0.344594	0.0547043	0.674757	-0.240963	0.170858	0.406205	-0.194259	-0.193157
MSTRG.61172	0.668919	0.653529	0.976758	0.376335	0.688737	0.788912	0.817795	0.98219	0.665417	0.761936	0.567623	0.852639	0.663113	0.811828	0.963822	0.859379	0.991492	0.800149	0.746046	0.852308	0.836795	0.940292	0.242536	0.712433	0.855458	0.377294	0.610639	0.845281	0.788193	0.843037	0.958727	0.309222	0.242536	0.704228	0.966997	0.701995	0.242536	0.945916	0.798278	0.742247	0.890107	0.960397	0.493929	0.967471	0.382484	0.789937	0.961953	0.242536	0.242398
MSTRG.61547	0.67697	0.638323	0.876053	0.0480575	0.310308	0.535856	0.418579	0.768577	0.400535	0.33334	0.320737	0.845156	0.341454	0.500437	0.677141	0.444752	0.77935	0.859434	0.714788	0.635855	0.545329	0.969435	-0.137284	0.412788	0.558183	-0.0150873	0.368127	0.528925	0.724741	0.472394	0.861908	-0.110602	-0.137284	0.814592	0.70544	0.40911	-0.137284	0.698725	0.645741	0.617327	0.748272	0.880975	0.0753432	0.733227	0.0934505	0.506065	0.941426	-0.137284	-0.136808
MSTRG.64545	-0.249214	-0.260463	0.354135	-0.203162	0.946749	0.939195	0.829187	0.480242	0.987396	0.84527	0.995915	0.0267248	0.0341535	0.217977	0.602447	0.655886	0.531576	-0.0413965	-0.136505	0.152738	0.90914	0.442823	-0.192808	0.968143	0.257989	-0.092513	0.991649	0.871245	-0.0647926	0.854227	0.302017	-0.0788639	-0.192808	-0.202651	0.721172	0.979148	-0.192808	0.378565	0.000988218	-0.095888	0.144453	0.291108	0.0530241	0.622103	-0.254539	0.132356	0.353322	-0.192808	-0.194211
MSTRG.64755	0.0410652	0.0271776	0.600057	0.00155188	0.981158	0.982406	0.917322	0.711584	0.984501	0.934309	0.95404	0.307589	0.284687	0.474887	0.808734	0.815161	0.744658	0.220157	0.146154	0.43166	0.990774	0.64233	-0.0319445	0.99703	0.512196	0.0895783	0.969571	0.977183	0.217114	0.958034	0.567332	0.0793222	-0.0319445	0.0793059	0.885462	0.98983	-0.0319445	0.618056	0.288084	0.189662	0.414629	0.546752	0.234131	0.828888	-0.038854	0.393915	0.585415	-0.0319445	-0.0299403
MSTRG.64862	0.223786	0.191052	0.743218	-0.145239	0.793432	0.932335	0.773341	0.756572	0.885266	0.732087	0.846324	0.509605	0.189747	0.409737	0.77952	0.667987	0.797272	0.477561	0.318788	0.4533	0.913113	0.871638	-0.251275	0.875624	0.472276	-0.11239	0.871768	0.875208	0.370877	0.824771	0.699913	-0.161446	-0.251275	0.346319	0.880021	0.881609	-0.251275	0.64183	0.361166	0.280548	0.5203	0.705019	0.0380153	0.831242	-0.149767	0.35698	0.78886	-0.251275	-0.251801
MSTRG.65917	0.335174	0.357919	0.621277	0.627668	0.829415	0.712321	0.920999	0.77019	0.665635	0.934693	0.591796	0.442865	0.76119	0.820068	0.856038	0.968326	0.771538	0.327581	0.422698	0.717196	0.790301	0.429981	0.627143	0.737293	0.821663	0.709995	0.608476	0.829798	0.484719	0.898834	0.610114	0.711283	0.627143	0.217545	0.820111	0.720801	0.627143	0.797455	0.607648	0.544295	0.635458	0.586385	0.799107	0.789884	0.579631	0.773087	0.50783	0.627143	0.626788
MSTRG.68077	0.980862	0.971517	0.858252	0.579051	0.021808	0.16708	0.280971	0.753278	-0.0224829	0.184686	-0.141117	0.977871	0.72057	0.746991	0.624016	0.457036	0.727776	0.984832	0.984424	0.853024	0.234994	0.754876	0.410614	0.0390436	0.772099	0.488141	-0.0898113	0.266116	0.974813	0.280352	0.869741	0.395301	0.410614	0.992585	0.54352	0.0271028	0.410614	0.793685	0.919739	0.936076	0.922021	0.890002	0.512708	0.610263	0.631311	0.797019	0.849114	0.410614	0.409378
MSTRG.70156	0.580521	0.584631	0.88242	0.565045	0.794423	0.792621	0.927328	0.957924	0.692508	0.898442	0.596059	0.731276	0.78974	0.897833	0.986176	0.984017	0.962654	0.644388	0.667618	0.869694	0.862167	0.754493	0.486515	0.758051	0.92284	0.604041	0.629552	0.888815	0.721551	0.92672	0.866881	0.564438	0.486515	0.535736	0.964247	0.744147	0.486515	0.957779	0.788323	0.727482	0.850745	0.857301	0.712831	0.950718	0.545617	0.865327	0.813485	0.486515	0.48588
MSTRG.70941	-0.281017	-0.292567	0.322986	-0.226436	0.941536	0.923961	0.807258	0.449854	0.982079	0.833575	0.994613	-0.0057402	0.00834261	0.192631	0.579532	0.632624	0.503385	-0.0770698	-0.170258	0.125657	0.896769	0.417099	-0.211414	0.963756	0.229509	-0.114298	0.988998	0.860533	-0.0998829	0.839461	0.274158	-0.0977151	-0.211414	-0.233358	0.697251	0.971092	-0.211414	0.34674	-0.0296317	-0.127181	0.110547	0.259277	0.0256801	0.602917	-0.281047	0.102651	0.322722	-0.211414	-0.21192
MSTRG.77783	-0.303183	-0.318786	0.301688	-0.27779	0.92671	0.915665	0.776389	0.428792	0.977049	0.809151	0.992084	-0.0262579	-0.035314	0.15414	0.554019	0.596669	0.473853	-0.0977442	-0.200261	0.0927965	0.883648	0.411923	-0.264636	0.955255	0.191246	-0.16774	0.989621	0.847484	-0.12924	0.8154	0.257748	-0.152124	-0.264636	-0.244249	0.674738	0.960212	-0.264636	0.31125	-0.0623386	-0.162748	0.077199	0.23931	-0.026213	0.587249	-0.32754	0.0628879	0.309255	-0.264636	-0.263572
MSTRG.78105	-0.207312	-0.222033	0.396124	-0.20397	0.952344	0.948398	0.828025	0.514315	0.993666	0.852067	0.996959	0.0735482	0.0525716	0.245828	0.634284	0.665616	0.563796	0.000280436	-0.0982989	0.190726	0.926984	0.491197	-0.205285	0.980286	0.284795	-0.0996639	0.997336	0.893978	-0.0280527	0.867199	0.35112	-0.0917137	-0.205285	-0.15169	0.746798	0.983819	-0.205285	0.406535	0.038056	-0.0611046	0.17957	0.334815	0.0436174	0.662826	-0.253482	0.156854	0.398833	-0.205285	-0.204854
MSTRG.78787	-0.260996	-0.273171	0.3406	-0.212197	0.948339	0.930826	0.816679	0.469711	0.985211	0.844528	0.99439	0.0133363	0.0274526	0.21253	0.596777	0.647231	0.518351	-0.060954	-0.152326	0.146318	0.905879	0.430769	-0.2	0.969233	0.249083	-0.10097	0.991379	0.872267	-0.0808032	0.850006	0.294447	-0.08604	-0.2	-0.214212	0.711068	0.974732	-0.2	0.36429	-0.00920998	-0.108197	0.128902	0.277743	0.0405278	0.620942	-0.264956	0.12265	0.339025	-0.2	-0.199887
MSTRG.78793	-0.260996	-0.273171	0.3406	-0.212197	0.948339	0.930826	0.816679	0.469711	0.985211	0.844528	0.99439	0.0133363	0.0274526	0.21253	0.596777	0.647231	0.518351	-0.060954	-0.152326	0.146318	0.905879	0.430769	-0.2	0.969233	0.249083	-0.10097	0.991379	0.872267	-0.0808032	0.850006	0.294447	-0.08604	-0.2	-0.214212	0.711068	0.974732	-0.2	0.36429	-0.00920998	-0.108197	0.128902	0.277743	0.0405278	0.620942	-0.264956	0.12265	0.339025	-0.2	-0.199887
MSTRG.78796	-0.260996	-0.273171	0.3406	-0.212197	0.948339	0.930826	0.816679	0.469711	0.985211	0.844528	0.99439	0.0133363	0.0274526	0.21253	0.596777	0.647231	0.518351	-0.060954	-0.152326	0.146318	0.905879	0.430769	-0.2	0.969233	0.249083	-0.10097	0.991379	0.872267	-0.0808032	0.850006	0.294447	-0.08604	-0.2	-0.214212	0.711068	0.974732	-0.2	0.36429	-0.00920998	-0.108197	0.128902	0.277743	0.0405278	0.620942	-0.264956	0.12265	0.339025	-0.2	-0.199887
MSTRG.78798	-0.260996	-0.273171	0.3406	-0.212197	0.948339	0.930826	0.816679	0.469711	0.985211	0.844528	0.99439	0.0133363	0.0274526	0.21253	0.596777	0.647231	0.518351	-0.060954	-0.152326	0.146318	0.905879	0.430769	-0.2	0.969233	0.249083	-0.10097	0.991379	0.872267	-0.0808032	0.850006	0.294447	-0.08604	-0.2	-0.214212	0.711068	0.974732	-0.2	0.36429	-0.00920998	-0.108197	0.128902	0.277743	0.0405278	0.620942	-0.264956	0.12265	0.339025	-0.2	-0.199887
MSTRG.78909	0.707931	0.673931	0.929396	0.143029	0.404305	0.601329	0.520433	0.845433	0.464613	0.443961	0.37629	0.880245	0.442625	0.601758	0.769198	0.558515	0.854613	0.876026	0.753974	0.71863	0.625211	0.989498	-0.036174	0.48911	0.655657	0.0918684	0.425068	0.617715	0.771026	0.571953	0.917312	-0.000282946	-0.036174	0.822468	0.786722	0.480695	-0.036174	0.783405	0.713754	0.678301	0.812026	0.930358	0.187655	0.814678	0.180104	0.6004	0.975287	-0.036174	-0.0352104
MSTRG.81565	-0.237257	-0.249382	0.363061	-0.193885	0.954441	0.938655	0.829092	0.49119	0.988673	0.855203	0.994704	0.0373384	0.0493632	0.235095	0.616202	0.664175	0.539166	-0.0378244	-0.127996	0.170199	0.915984	0.449056	-0.185129	0.97473	0.272034	-0.0839856	0.992924	0.883534	-0.056252	0.862219	0.317232	-0.0709541	-0.185129	-0.191495	0.728151	0.979736	-0.185129	0.387077	0.0153108	-0.0837343	0.153314	0.300674	0.0584597	0.639442	-0.245932	0.145949	0.360191	-0.185129	-0.185024
MSTRG.82312	0.936799	0.945353	0.85818	0.830363	0.269518	0.291901	0.523696	0.855451	0.121869	0.473608	-0.00850187	0.920231	0.948476	0.952208	0.784382	0.72467	0.80937	0.864658	0.952663	0.976849	0.395402	0.643992	0.714119	0.21522	0.956592	0.790006	0.0431049	0.457222	0.967984	0.507186	0.882114	0.724359	0.714119	0.858841	0.669669	0.188837	0.714119	0.915739	0.993523	0.987403	0.965171	0.877163	0.823605	0.734261	0.85459	0.978839	0.781273	0.714119	0.715695
MSTRG.82316	0.908619	0.885831	0.905596	0.384392	0.130108	0.317863	0.339291	0.793498	0.139987	0.243738	0.0309253	0.973251	0.595945	0.677631	0.670045	0.46432	0.778025	0.983815	0.923174	0.803291	0.36465	0.87959	0.199156	0.18417	0.71718	0.298443	0.084579	0.37864	0.920852	0.362135	0.909134	0.198967	0.199156	0.974562	0.629065	0.174208	0.199156	0.787941	0.851743	0.850581	0.893508	0.929077	0.350827	0.686315	0.438667	0.71278	0.92814	0.199156	0.199011
MSTRG.83088	0.629144	0.611696	0.961606	0.342114	0.726295	0.81776	0.832796	0.97889	0.703736	0.789618	0.608766	0.822269	0.639776	0.797035	0.96896	0.86632	0.983695	0.761504	0.70479	0.832792	0.865194	0.933777	0.212906	0.750452	0.839372	0.34954	0.653275	0.875363	0.750979	0.865689	0.947491	0.28437	0.212906	0.668011	0.975319	0.73608	0.212906	0.930043	0.768624	0.705442	0.861345	0.942823	0.470411	0.979142	0.346464	0.767782	0.947622	0.212906	0.214394
MSTRG.83091	0.984989	0.977113	0.869011	0.614278	0.0624055	0.181138	0.307616	0.773409	-0.000148417	0.230075	-0.121574	0.982375	0.760747	0.789001	0.659406	0.495842	0.749241	0.974006	0.989198	0.886856	0.264832	0.752759	0.44988	0.0723403	0.807523	0.528213	-0.0694604	0.305225	0.980587	0.318475	0.888241	0.438201	0.44988	0.986823	0.567523	0.0507173	0.44988	0.816989	0.942564	0.954677	0.936472	0.898998	0.546797	0.646121	0.658943	0.829911	0.850057	0.44988	0.450499
MSTRG.83673	-0.260996	-0.273171	0.3406	-0.212197	0.948339	0.930826	0.816679	0.469711	0.985211	0.844528	0.99439	0.0133363	0.0274526	0.21253	0.596777	0.647231	0.518351	-0.060954	-0.152326	0.146318	0.905879	0.430769	-0.2	0.969233	0.249083	-0.10097	0.991379	0.872267	-0.0808032	0.850006	0.294447	-0.08604	-0.2	-0.214212	0.711068	0.974732	-0.2	0.36429	-0.00920998	-0.108197	0.128902	0.277743	0.0405278	0.620942	-0.264956	0.12265	0.339025	-0.2	-0.199887
MSTRG.84440	0.759398	0.722409	0.80813	0.0927089	0.0646185	0.306694	0.21151	0.661584	0.152633	0.113027	0.0693609	0.861943	0.331458	0.44715	0.5321	0.27887	0.66068	0.899328	0.770263	0.605506	0.319443	0.884991	-0.101731	0.166788	0.498461	-0.00200152	0.118384	0.308995	0.761537	0.256424	0.803736	-0.104529	-0.101731	0.891658	0.534583	0.163587	-0.101731	0.616263	0.658035	0.655371	0.72989	0.829673	0.0552849	0.583856	0.154296	0.477773	0.87835	-0.101731	-0.101674
MSTRG.8455	0.80615	0.827316	0.804981	0.880138	0.420168	0.398481	0.675041	0.851569	0.248836	0.620534	0.129461	0.806973	0.972109	0.969082	0.819874	0.840811	0.821628	0.741018	0.850759	0.944089	0.493322	0.558119	0.804271	0.337077	0.973936	0.877908	0.166765	0.547023	0.880077	0.628599	0.808178	0.833874	0.804271	0.68952	0.722548	0.324379	0.804271	0.928579	0.933312	0.918969	0.918387	0.808991	0.928663	0.740999	0.882375	0.986311	0.702061	0.804271	0.801585
MSTRG.85452	0.857463	0.828825	0.730468	0.243922	-0.157337	0.060603	0.0359374	0.568537	-0.11021	-0.0610525	-0.203065	0.87246	0.407412	0.461277	0.412596	0.167608	0.547044	0.915627	0.838746	0.621097	0.0932903	0.746528	0.0547267	-0.0803414	0.496374	0.12607	-0.151618	0.102537	0.814401	0.0668687	0.744003	0.0235434	0.0547267	0.951411	0.368122	-0.0897774	0.0547267	0.562535	0.709475	0.731578	0.730748	0.768683	0.142781	0.446731	0.315261	0.514294	0.782399	0.0547267	0.0554884
MSTRG.85509	0.133062	0.116271	0.679775	0.0209748	0.95593	0.991325	0.922024	0.770861	0.97093	0.918491	0.931411	0.402622	0.319116	0.514308	0.84607	0.82787	0.803064	0.326502	0.238397	0.490026	0.996438	0.726735	-0.033923	0.982033	0.558722	0.0955883	0.951332	0.979156	0.306793	0.959078	0.643347	0.0734658	-0.033923	0.183652	0.923697	0.979077	-0.033923	0.67755	0.359845	0.26562	0.493795	0.630592	0.245642	0.867506	-0.00966559	0.442965	0.673459	-0.033923	-0.0330746
MSTRG.8595	0.286212	0.27044	0.784139	0.136631	0.92406	0.964065	0.926423	0.855313	0.920261	0.917944	0.862882	0.539767	0.440937	0.629447	0.91616	0.873887	0.886574	0.461217	0.388163	0.619137	0.990563	0.80384	0.0603006	0.947597	0.671149	0.194603	0.888954	0.984258	0.450227	0.96841	0.755148	0.160698	0.0603006	0.329399	0.969369	0.937329	0.0603006	0.779609	0.501238	0.414073	0.623176	0.741632	0.333997	0.933383	0.110004	0.564789	0.770628	0.0603006	0.0616384
MSTRG.86392	0.767568	0.73237	0.868912	0.135305	0.179893	0.408256	0.326495	0.74244	0.254683	0.231769	0.166477	0.891383	0.394341	0.522729	0.628064	0.389281	0.744449	0.91493	0.791118	0.667534	0.426673	0.93299	-0.0565654	0.274211	0.575274	0.0538698	0.216144	0.418153	0.791029	0.370958	0.861433	-0.0467332	-0.0565654	0.890632	0.632777	0.269753	-0.0565654	0.695216	0.70266	0.689981	0.782677	0.884215	0.124564	0.67481	0.189382	0.544574	0.928597	-0.0565654	-0.0565334
MSTRG.86581	0.391214	0.349391	0.792324	-0.171685	0.554872	0.764221	0.575036	0.731924	0.681513	0.506547	0.632289	0.644387	0.162501	0.372639	0.697083	0.505587	0.767392	0.64683	0.461589	0.475408	0.743327	0.948943	-0.323197	0.669086	0.440373	-0.188053	0.666335	0.703321	0.491875	0.635761	0.756512	-0.262439	-0.323197	0.551321	0.784617	0.675011	-0.323197	0.621594	0.432724	0.375417	0.58306	0.772897	-0.0598033	0.765209	-0.149421	0.345879	0.868346	-0.323197	-0.323728
MSTRG.90507	0.855308	0.82696	0.74189	0.240803	-0.140687	0.08094	0.0549365	0.579058	-0.0902478	-0.0464984	-0.182528	0.877332	0.407741	0.465224	0.424905	0.181169	0.562396	0.922291	0.841504	0.624734	0.111569	0.76055	0.0509647	-0.062053	0.502449	0.124612	-0.13251	0.11782	0.817831	0.0839853	0.751383	0.021925	0.0509647	0.950833	0.385014	-0.0690863	0.0509647	0.573971	0.711597	0.733235	0.738539	0.77853	0.144584	0.457716	0.310655	0.517824	0.794577	0.0509647	0.0509358
MSTRG.90562	0.683405	0.646083	0.891005	0.0697943	0.334978	0.557271	0.448834	0.789221	0.420071	0.361687	0.338506	0.854068	0.364215	0.523328	0.700091	0.474834	0.800233	0.866021	0.724728	0.654097	0.567469	0.97691	-0.11407	0.433473	0.58158	0.0100446	0.385728	0.551299	0.7369	0.498937	0.875003	-0.0847625	-0.11407	0.815783	0.728382	0.430885	-0.11407	0.721483	0.661166	0.631316	0.765163	0.894646	0.104018	0.752281	0.113682	0.528508	0.952254	-0.11407	-0.114006
MSTRG.92936	0.772066	0.791577	0.75764	0.891547	0.448425	0.373117	0.652876	0.831163	0.245462	0.65022	0.124317	0.758804	0.988776	0.98452	0.820409	0.84271	0.780897	0.659702	0.798252	0.946004	0.492931	0.496941	0.827966	0.351837	0.972683	0.89619	0.169132	0.569755	0.830668	0.635188	0.788521	0.859367	0.827966	0.642657	0.697361	0.314987	0.827966	0.894567	0.916607	0.89117	0.872836	0.762491	0.932814	0.754276	0.888159	0.984381	0.641855	0.827966	0.832051
MSTRG.93031	0.22284	0.218551	0.703978	0.248536	0.971667	0.946169	0.973389	0.8232	0.917152	0.98537	0.860908	0.44806	0.509493	0.66832	0.909328	0.932392	0.842969	0.346927	0.324492	0.614436	0.984575	0.66535	0.208956	0.955543	0.696912	0.329638	0.883024	0.991802	0.394532	0.998695	0.680435	0.314297	0.208956	0.214864	0.944253	0.941983	0.208956	0.765703	0.481272	0.390775	0.57945	0.657701	0.463334	0.903756	0.209189	0.598355	0.656771	0.208956	0.210826
MSTRG.93319	0.238035	0.214289	0.750549	0.0273447	0.909454	0.96036	0.874166	0.817687	0.927226	0.880443	0.87606	0.50248	0.352015	0.556105	0.87632	0.809491	0.840957	0.422911	0.329196	0.558003	0.98054	0.80718	-0.0537755	0.948846	0.59823	0.0818077	0.906354	0.973356	0.39123	0.934807	0.729735	0.0460404	-0.0537755	0.306482	0.937238	0.932633	-0.0537755	0.715779	0.437072	0.343973	0.561308	0.708947	0.22242	0.914347	0.00616328	0.485406	0.753415	-0.0537755	-0.049522
MSTRG.94306	-0.260996	-0.273171	0.3406	-0.212197	0.948339	0.930826	0.816679	0.469711	0.985211	0.844528	0.99439	0.0133363	0.0274526	0.21253	0.596777	0.647231	0.518351	-0.060954	-0.152326	0.146318	0.905879	0.430769	-0.2	0.969233	0.249083	-0.10097	0.991379	0.872267	-0.0808032	0.850006	0.294447	-0.08604	-0.2	-0.214212	0.711068	0.974732	-0.2	0.36429	-0.00920998	-0.108197	0.128902	0.277743	0.0405278	0.620942	-0.264956	0.12265	0.339025	-0.2	-0.199887
MSTRG.95788	0.973545	0.981408	0.811797	0.823208	0.11719	0.143525	0.372645	0.772465	-0.026255	0.3267	-0.155226	0.925028	0.916694	0.902966	0.689201	0.600057	0.73225	0.880978	0.974653	0.948214	0.257994	0.602952	0.698261	0.0718664	0.900516	0.760604	-0.104882	0.324668	0.973527	0.368434	0.845062	0.690306	0.698261	0.902194	0.557646	0.0388708	0.698261	0.84849	0.986661	0.996528	0.940029	0.839804	0.763926	0.645037	0.85112	0.937202	0.74264	0.698261	0.700603
MSTRG.96133	-0.235693	-0.249482	0.368177	-0.214037	0.948761	0.941182	0.821471	0.491204	0.990288	0.845606	0.996877	0.0428815	0.034688	0.224488	0.613274	0.653541	0.54	-0.0294749	-0.126791	0.164737	0.916059	0.462994	-0.209152	0.974269	0.263123	-0.106529	0.995591	0.881631	-0.0557469	0.856794	0.321748	-0.0954301	-0.209152	-0.182868	0.728385	0.979786	-0.209152	0.383438	0.011342	-0.0877005	0.152544	0.306127	0.0370844	0.639971	-0.264336	0.135734	0.370065	-0.209152	-0.209033
MSTRG.98604	0.691332	0.669846	0.981867	0.307644	0.616567	0.751088	0.745299	0.959751	0.620604	0.679798	0.524274	0.876808	0.604401	0.759953	0.922589	0.784018	0.969754	0.839501	0.761362	0.824889	0.790571	0.975998	0.157175	0.660248	0.808579	0.292945	0.569577	0.792924	0.796941	0.777669	0.963857	0.216066	0.157175	0.752705	0.932342	0.651547	0.157175	0.914336	0.785136	0.734305	0.882672	0.970217	0.406981	0.938881	0.323715	0.744445	0.986297	0.157175	0.157086
[truncated: 890 more columns]
